# Supplementary material for: A low resource requirement molecular diagnostic and surveillance tool for Shigella in the era of vaccination
Source: Research Square preprint supplement (doi:10.21203/rs.3.rs-7399876/v1), 2025-10-09
Supplement: Supplementary file 1 [file 5db5e3344bdc89026cf5b589.xlsx]

## Sheet: Supplementary Table 5
Sample Number	Sample ID	Year	Species/serotype	Accession number	mPCR	ARIBA	ShigaPass	ShigaTyper
S041	FC1834	1995	S. flexneri	ERR3133912	S. flexneri 1b	S. flexneri 1b	S. flexneri 1b	Novel
S042	FC1277	1995	S. flexneri	ERR3133910	Shigella/EIEC	Shigella/EIEC	S. flexneri 4av	S. flexneri 4av
S043	FC0848	1994	S. flexneri	ERR3133907	S. flexneri 1b	S. flexneri 1b	S. flexneri 7b	Novel
S046	FC2216	1997	S. flexneri	ERR3133925	S. flexneri 1b	S. flexneri 1b	S. flexneri 1b	Novel
S047	FC0393	1990	S. flexneri	ERR3133892	S. flexneri 2a	S. flexneri 2a	S. flexneri 2a	S. flexneri 2a
S050	FC1728	1992	S. flexneri	ERR3133895	S. flexneri 2a	S. flexneri 2a	S. flexneri 2a	Novel
S061	FC0909	1993	S. flexneri	ERR3133903	S. flexneri 2a	S. flexneri 2a	S. flexneri 2a	S. flexneri 2a
S065	FC0315	1992	S. flexneri	ERR3133897	S. flexneri 1b	S. flexneri 1b	S. flexneri 1b	S. flexneri 1b
S068	FC1793	1992	S. flexneri	ERR3133900	S. flexneri 3a/5b	S. flexneri 3a/5b	S. flexneri 5b	S. flexneri 5b
S070	FC0122	1999	S. flexneri	ERR3133932	S. flexneri 2a	S. flexneri 2a	S. flexneri 2a	S. flexneri 2av
S080	FC0425	2003	S. flexneri	ERR3134032	S. flexneri 1b	S. flexneri 1b	S. flexneri 1b	Novel
S096	FC1536	1995	S. flexneri	ERR3133911	non-Shigella/EIEC	S. flexneri 1b	S. flexneri 1b	Novel
S097	FC1694	1998	S. flexneri	ERR3133930	S. flexneri 1b	S. flexneri 1b	S. flexneri 1b	Novel
S112	FC0026	2006	S. flexneri	ERR3134041	S. flexneri 2a	S. flexneri 2a	S. flexneri 2a	S. flexneri 2a
S115	FC1788	2008	S. flexneri	ERR3134046	S. flexneri 1b	S. flexneri 1b	S. flexneri 1b	S. flexneri 1b
S127	FC1461	2014	S. flexneri	ERR3133990	S. flexneri 2a	S. flexneri 2a	S. flexneri 2a	No prediction
S129	FC0533	2016	S. flexneri	ERR3134010	S. flexneri 2a	S. flexneri 2a	S. flexneri 2a	S. flexneri 2a
S130	FC0637	2011	S. flexneri	ERR3133949	S. flexneri 1b	S. flexneri 1b	S. flexneri 1b	S. flexneri 1b
S136	FC1912	2016	S. flexneri	ERR3134012	S. flexneri 2a	S. flexneri 2a	S. flexneri 2a	S. flexneri 2a
S138	FC1997	2006	S. flexneri	ERR3134042	S. flexneri 2b	S. flexneri 2b	S. flexneri 2b	S. flexneri 2b
S051	FC0006	1999	S. flexneri 1a	ERR3133931	S. flexneri 1a/1c(7a)	S. flexneri 2a	S. flexneri 2a	S. flexneri 2a
S039	FC0401	1995	S. flexneri 1b	ERR3133914	S. flexneri 2a	S. flexneri 2a	S. flexneri 2a	S. flexneri 2av
S107	FC0401	2017	S. flexneri 1b	NMXQ00000000	S. flexneri 1b	S. flexneri 1b	S. flexneri 1b	S. flexneri 1b
S060	FC2595	1996	S. flexneri 1c/7a	ERR3133919	S. flexneri 1a/1c(7a)	S. flexneri 1a/1c(7a)	S. flexneri 1c(7a)	S. flexneri 1c(7a)
S095	FC1113	1997	S. flexneri 1c/7a	ERR3133927	S. flexneri 1a/1c(7a)	S. flexneri 1a/1c(7a)	S. flexneri 1c(7a)	S. flexneri 1c(7a)
S117	FC2188	2009	S. flexneri 1c/7a	ERR3134059	S. flexneri 1a/1c(7a)	S. flexneri 1a/1c(7a)	S. flexneri 1c(7a)	Novel
S021	FC2101	2016	S. flexneri 2	PDXU00000000	S. flexneri 2a	S. flexneri 2a	S. flexneri 2a	S. flexneri 2a
S044	FC0193	1997	S. flexneri 2a	ERR3133924	S. flexneri 2a	S. flexneri 2a	S. flexneri 2a	S. flexneri 2a
S049	FC1739	1993	S. flexneri 2a	ERR3133902	S. flexneri 2a	S. flexneri 2a	S. flexneri 2a	EIEC
S062	FC0013	1990	S. flexneri 2a	ERR3133893	S. flexneri 2a	S. flexneri 2a	S. flexneri 2a	S. flexneri 2av
S066	FC0409	1995	S. flexneri 2a	ERR3133917	S. flexneri 2a	S. flexneri 2a	S. flexneri 2a	Novel
S072	FC0420	2017	S. flexneri 2a	NMXP00000000	S. flexneri 2a	S. flexneri 2a	S. flexneri 2a	S. flexneri 2a
S085	FC1673	2005	S. flexneri 2a	ERR3134036	S. flexneri 2a	S. flexneri 2a	S. flexneri 2a	Novel
S091	FC1050	1997	S. flexneri 2a	ERR3133926	S. flexneri 2a	S. flexneri 2a	S. flexneri 2a	Novel
S098	FC1659	2017	S. flexneri 2a	NGWA00000000	S. flexneri 2a	S. flexneri 2a	S. flexneri 2a	S. flexneri 2a
S101	FC1604	2005	S. flexneri 2a	ERR3134061	S. flexneri 2a	S. flexneri 2a	S. flexneri 2a	S. flexneri 2a
S102	FC1405	2011	S. flexneri 2a	PDXV00000000	S. flexneri 2b	S. flexneri 2a	S. flexneri 2a	S. flexneri 2a
S104	FC1268	2011	S. flexneri 2a	ERR3133954	S. flexneri 2a	S. flexneri 2a	S. flexneri 2a	S. flexneri 2a
S114	FC2003	2009	S. flexneri 2a	ERR3134057	S. flexneri 2a	S. flexneri 2a	S. flexneri 2a	Novel
S128	FC2899	2016	S. flexneri 2a	ERR3134006	S. flexneri 2a	S. flexneri 2a	Unknown	S. flexneri 2av
S133	FC2145	2008	S. flexneri 2a	ERR3134053	S. flexneri 2a	S. flexneri 2a	S. flexneri 2a	S. flexneri 2a
S134	FC1824	2017	S. flexneri 2a	NMXW00000000	S. flexneri 2a	S. flexneri 2a	S. flexneri 2a	S. flexneri 2a
S140	FC1310	2008	S. flexneri 2a	ERR3134051	S. flexneri 2a	S. flexneri 2a	S. flexneri 2a	EIEC
S143	FC0248	2001	S. flexneri 2a	NMXO00000000	S. flexneri 2a	S. flexneri 2a	S. flexneri 2a	S. flexneri 2a
S057	FC1876	1992	S. flexneri 2b	ERR3133896	S. flexneri 2b	S. flexneri 2b	S. flexneri 2b	Novel
S089	FC2242	1997	S. flexneri 2b	ERR3133923	non-Shigella/EIEC	S. flexneri 2b	S. flexneri 2b	S. flexneri 2b
S090	FC2245	1997	S. flexneri 2b	ERR3133921	S. flexneri 2b	S. flexneri 2b	S. flexneri 2b	S. flexneri 2b
S119	FC1282	2005	S. flexneri 2b	ERR3134038	S. flexneri 2b	S. flexneri 2b	S. flexneri 2b	S. flexneri 2b
S082	FC1800	2000	S. flexneri 3a	ERR3134027	S. flexneri 3a/5b	S. flexneri 3a/5b	S. flexneri 3a	S. flexneri 3a
S081	FC1996	2000	S. flexneri 5b	ERR3134026	S. flexneri 3a/5b	S. flexneri 3a/5b	S. flexneri 5b	S. flexneri 5b
S086	FC2013	2000	S. flexneri 5b	ERR3134025	S. flexneri 3a/5b	S. flexneri 3a/5b	S. flexneri 5b	S. flexneri 5b
S087	FC1885	2000	S. flexneri 5b	ERR3134024	S. flexneri 3a/5b	S. flexneri 3a/5b	S. flexneri 5b	Novel
S092	FC1905	1992	S. flexneri 5b	ERR3133899	S. flexneri 3a/5b	S. flexneri 3a/5b	S. flexneri 5b	EIEC
S099	FC1966	2000	S. flexneri 5b	ERR3134016	S. flexneri 2a	S. flexneri 2a	S. flexneri 2a	Novel
S142	FC1783	2000	S. flexneri 5b	ERR3134028	S. flexneri 3a/5b	S. flexneri 3a/5b	S. flexneri 5b	S. flexneri 5b
S045	FC1231	2017	S. sonnei	ERR3134022	S. sonnei	S. sonnei	S. sonnei	No prediction
S048	FC1794	2014	S. sonnei	ERR3133963	S. sonnei	S. sonnei	S. sonnei	EIEC
S052	FC1769	1993	S. sonnei	ERR3133904	S. sonnei	S. sonnei	S. sonnei	EIEC
S053	FC1793	2004	S. sonnei	ERR3133962	S. sonnei	S. sonnei	S. sonnei	EIEC
S054	FC2144	2014	S. sonnei	ERR3133964	S. sonnei	S. sonnei	S. sonnei	S. sonnei
S055	FC1723	1994	S. sonnei	ERR3133906	S. sonnei	S. sonnei	S. sonnei	EIEC
S056	FC1582	2014	S. sonnei	ERR3133965	S. sonnei	S. sonnei	S. sonnei	S. sonnei
S059	FC0078	1997	S. sonnei	ERR3133922	S. sonnei	S. sonnei	S. sonnei	S. sonnei
S063	FC0673	1996	S. sonnei	ERR3133920	S. sonnei	S. sonnei	S. sonnei	S. sonnei
S064	FC1582	1990	S. sonnei	ERR3133891	S. sonnei	S. sonnei	S. sonnei	S. sonnei
S069	FC1534	2014	S. sonnei	ERR3133976	S. sonnei	S. sonnei	S. sonnei	S. sonnei
S071	FC0206	1998	S. sonnei	ERR3133928	S. sonnei	S. sonnei	S. sonnei	S. sonnei
S073	FC1501	1998	S. sonnei	ERR3133929	S. sonnei	S. sonnei	S. sonnei	S. sonnei
S074	FC0015	2017	S. sonnei	NMXR00000000	S. sonnei	S. sonnei	S. sonnei	S. sonnei
S076	FC1653	2017	S. sonnei	PDXX00000000	S. sonnei	S. sonnei	S. sonnei	S. sonnei
S077	FC1706	2017	S. sonnei	PDYB00000000	S. sonnei	S. sonnei	S. sonnei	S. sonnei
S078	FC1182	2006	S. sonnei	ERR3134040	S. sonnei	S. sonnei	S. sonnei	S. sonnei
S079	FC0920	2004	S. sonnei	ERR3134033	S. sonnei	S. sonnei	S. sonnei	EIEC
S083	FC1453	2004	S. sonnei	ERR3134035	S. sonnei	S. sonnei	S. sonnei	S. sonnei
S084	FC0956	2000	S. sonnei	ERR3134034	S. sonnei	S. sonnei	S. sonnei	S. sonnei
S088	FC1454	2015	S. sonnei	ERR3133995	S. sonnei	S. sonnei	S. sonnei	EIEC
S094	FC1571	1995	S. sonnei	ERR3133918	S. sonnei	S. sonnei	S. sonnei	S. flexneri novel
S100	FC1373	2016	S. sonnei	NGWH00000000	S. sonnei	S. sonnei	S. sonnei	S. sonnei
S103	FC1172	2006	S. sonnei	ERR3134060	S. sonnei	S. sonnei	S. sonnei	S. sonnei
S106	FC0288	2016	S. sonnei	NGWI00000000	S. sonnei	S. sonnei	S. sonnei	S. sonnei
S108	FC1353	2008	S. sonnei	ERR3134050	S. sonnei	S. sonnei	S. sonnei	S. sonnei
S109	FC1316	2006	S. sonnei	ERR3134045	S. sonnei	S. sonnei	S. sonnei	EIEC
S110	FC1973	2014	S. sonnei	ERR3133971	S. sonnei	S. sonnei	S. sonnei	EIEC
S111	FC3288	2015	S. sonnei	ERR3133997	S. sonnei	S. sonnei	S. sonnei	S. sonnei
S116	FC1974	2009	S. sonnei	ERR3134058	S. sonnei	S. sonnei	S. sonnei	S. sonnei
S118	FC1219	2008	S. sonnei	ERR3134047	S. sonnei	S. sonnei	S. sonnei	S. sonnei
S121	FC0398	2005	S. sonnei	ERR3134039	S. sonnei	S. sonnei	S. sonnei	EIEC
S122	FC1984	2009	S. sonnei	ERR3134055	S. sonnei	S. sonnei	S. sonnei	S. sonnei
S123	FC2222	2009	S. sonnei	ERR3134056	S. sonnei	S. sonnei	S. sonnei	S. sonnei
S124	FC2067	2001	S. sonnei	ERR3134031	S. sonnei	S. sonnei	S. sonnei	S. sonnei
S125	FC1322	2008	S. sonnei	ERR3134048	S. sonnei	S. sonnei	S. sonnei	S. sonnei
S126	FC1341	2008	S. sonnei	ERR3134049	S. sonnei	S. sonnei	S. sonnei	S. sonnei
S131	FC1058	2010	S. sonnei	ERR3133943	S. sonnei	S. sonnei	S. sonnei	S. sonnei
S132	FC1008	2010	S. sonnei	ERR3133941	S. sonnei	S. sonnei	S. sonnei	S. sonnei
S137	FC1078	2006	S. sonnei	ERR3134043	S. sonnei	S. sonnei	S. sonnei	S. sonnei
S139	FC2064	2001	S. sonnei	ERR3134030	S. sonnei	S. sonnei	S. sonnei	S. sonnei
S141	FC1228	2008	S. sonnei	ERR3134052	S. sonnei	S. sonnei	S. sonnei	S. sonnei
S144	FC2105	2009	S. sonnei	ERR3134054	S. sonnei	S. sonnei	S. sonnei	EIEC
S145	FC2042	2001	S. sonnei	ERR3134029	S. sonnei	S. sonnei	S. sonnei	S. sonnei
S146	FC0124	2006	S. sonnei	ERR3134044	S. sonnei	S. sonnei	S. sonnei	EIEC
S158	Ss616	-	S. sonnei	SRR16612616	S. sonnei	-	-	-
S162	ECO4	-	E. coli	ERR2760053	E. coli	-	-	-

## Sheet: Supplementary Data
Accession number	Accession number (resequenced)	Data used*	Sample	Country	Region	GEMS	ShigaTyper	ShigaPass	ARIBA	RNaseP	ipaH	SS_DNAm	gtrI	gtrII	oac_1b	oac_3a	gtrX	CTX-M-1	CTX-M-3	CTX-M-14	CTX_M_15	CTX-M-27	CTX-M-55	mphA
ERR6004654		ERR6004654	100015	The Gambia	West Africa	2a	2a	2a	2a	negative	positive	negative	negative	positive	negative	negative	negative	negative	negative	negative	negative	negative	negative	negative
ERR6005431		ERR6005431	100029	The Gambia	West Africa	S. sonnei	S. sonnei	S. sonnei	S. sonnei	negative	positive	positive	negative	negative	negative	negative	negative	negative	negative	negative	negative	negative	negative	negative
ERR6004655		ERR6004655	100040	The Gambia	West Africa	2a	2a	2a	2a	negative	positive	negative	negative	positive	negative	negative	negative	negative	negative	negative	negative	negative	negative	negative
ERR6004656		ERR6004656	100060	The Gambia	West Africa	2a	2a	2a	2a	negative	positive	negative	negative	positive	negative	negative	negative	negative	negative	negative	negative	negative	negative	negative
ERR6004657		ERR6004657	100093	The Gambia	West Africa	2a	2a	2a	2a	negative	positive	negative	negative	positive	negative	negative	negative	negative	negative	negative	negative	negative	negative	negative
ERR6005432		ERR6005432	100173	The Gambia	West Africa	S. sonnei	S. sonnei	S. sonnei	S. sonnei	negative	positive	positive	negative	negative	negative	negative	negative	negative	negative	negative	negative	negative	negative	negative
ERR6005433		ERR6005433	100178	The Gambia	West Africa	S. sonnei	EIEC	S. sonnei	Shigella/EIEC	negative	positive	positive	negative	positive	negative	negative	negative	negative	negative	negative	negative	negative	negative	negative
ERR6004632		ERR6004632	100183	Pakistan	South Asia	2a	2b	2a	2a	negative	positive	negative	negative	positive	negative	negative	negative	negative	negative	negative	negative	negative	negative	negative
ERR6005434		ERR6005434	100187	The Gambia	West Africa	S. sonnei	EIEC	S. sonnei	S. sonnei	negative	positive	positive	negative	negative	negative	negative	negative	negative	negative	negative	negative	negative	negative	negative
ERR6004658		ERR6004658	100206	The Gambia	West Africa	2a	2a	2a	2a	negative	positive	negative	negative	positive	negative	negative	negative	negative	negative	negative	negative	negative	negative	negative
ERR6004659		ERR6004659	100231	The Gambia	West Africa	X	Xv(4c)	Xv	X/Xv	negative	positive	negative	negative	negative	negative	negative	positive	negative	negative	negative	negative	negative	negative	negative
ERR6004660		ERR6004660	100234	The Gambia	West Africa	2a	2a	2a	2a	negative	positive	negative	negative	positive	negative	negative	negative	negative	negative	negative	negative	negative	negative	negative
ERR6005435		ERR6005435	100239	The Gambia	West Africa	S. sonnei	S. sonnei	S. sonnei	S. sonnei	negative	positive	positive	negative	negative	negative	negative	negative	negative	negative	negative	negative	negative	negative	negative
ERR6005436		ERR6005436	100271	The Gambia	West Africa	S. sonnei	S. sonnei	S. sonnei	S. sonnei	negative	positive	positive	negative	negative	negative	negative	negative	negative	negative	negative	negative	negative	negative	negative
ERR6004661		ERR6004661	100272	The Gambia	West Africa	6	6	6	Shigella/EIEC	negative	positive	negative	negative	negative	negative	negative	negative	negative	negative	negative	negative	negative	negative	negative
ERR6005437		ERR6005437	100275	The Gambia	West Africa	S. sonnei	S. sonnei	S. sonnei	S. sonnei	negative	positive	positive	negative	negative	negative	negative	negative	negative	negative	negative	negative	negative	negative	negative
ERR6005438	ERR6006180	Merged	100296	The Gambia	West Africa	S. sonnei	No prediction	S. sonnei	S. sonnei	negative	positive	positive	negative	negative	negative	negative	negative	negative	negative	negative	negative	negative	negative	negative
ERR6004663		ERR6004663	100301	The Gambia	West Africa	X	Xv(4c)	Xv	X/Xv	negative	positive	negative	negative	negative	negative	negative	positive	negative	negative	negative	negative	negative	negative	negative
ERR6004664		ERR6004664	100321	The Gambia	West Africa	X	Xv(4c)	Xv	X/Xv	negative	positive	negative	negative	negative	negative	negative	positive	negative	negative	negative	negative	negative	negative	negative
ERR6005440		ERR6005440	100339	The Gambia	West Africa	S. sonnei	S. sonnei	S. sonnei	S. sonnei	negative	positive	positive	negative	negative	negative	negative	negative	negative	negative	negative	negative	negative	negative	negative
ERR6004662		ERR6004662	100345	The Gambia	West Africa	2a	2a	2a	2a	negative	positive	negative	negative	positive	negative	negative	negative	negative	negative	negative	negative	negative	negative	negative
ERR6005441		ERR6005441	100349	The Gambia	West Africa	S. sonnei	S. sonnei	S. sonnei	S. sonnei	negative	positive	positive	negative	negative	negative	negative	negative	negative	negative	negative	negative	negative	negative	negative
ERR6004665		ERR6004665	100367	The Gambia	West Africa	2a	2a	2a	2a	negative	positive	negative	negative	positive	negative	negative	negative	negative	negative	negative	negative	negative	negative	negative
ERR6005443		ERR6005443	100488	The Gambia	West Africa	S. sonnei	EIEC	S. sonnei	S. sonnei	negative	positive	positive	negative	negative	negative	negative	negative	negative	negative	negative	negative	negative	negative	negative
ERR6004666		ERR6004666	100490	The Gambia	West Africa	6	6	6	Shigella/EIEC	negative	positive	negative	negative	negative	negative	negative	negative	negative	negative	negative	negative	negative	negative	negative
ERR6005444		ERR6005444	100500	The Gambia	West Africa	S. sonnei	S. sonnei	S. sonnei	S. sonnei	negative	positive	positive	negative	negative	negative	negative	negative	negative	negative	negative	negative	negative	negative	negative
ERR6005445	ERR6006181	Merged	100510	The Gambia	West Africa	S. sonnei	S. sonnei	S. sonnei	S. sonnei	negative	positive	positive	negative	negative	negative	negative	negative	negative	negative	negative	negative	negative	negative	negative
ERR6004667		ERR6004667	100512	The Gambia	West Africa	6	6	6	Shigella/EIEC	negative	positive	negative	negative	negative	negative	negative	negative	negative	negative	negative	negative	negative	negative	negative
ERR6005446		ERR6005446	100522	The Gambia	West Africa	S. sonnei	S. sonnei	S. sonnei	S. sonnei	negative	positive	positive	negative	negative	negative	negative	negative	negative	negative	negative	negative	negative	negative	negative
ERR6004669		ERR6004669	100537	The Gambia	West Africa	6	6	6	Shigella/EIEC	negative	positive	negative	negative	negative	negative	negative	negative	negative	negative	negative	negative	negative	negative	negative
ERR6004670	ERR6006182	Merged	100547	The Gambia	West Africa	2a	2a	2a	2a	negative	positive	negative	negative	positive	negative	negative	negative	negative	negative	negative	negative	negative	negative	negative
ERR6005447		ERR6005447	100572	The Gambia	West Africa	S. sonnei	S. sonnei	S. sonnei	S. sonnei	negative	positive	positive	negative	negative	negative	negative	negative	negative	negative	negative	negative	negative	negative	negative
ERR6005448		ERR6005448	100579	The Gambia	West Africa	S. sonnei	S. sonnei	S. sonnei	S. sonnei	negative	positive	positive	negative	negative	negative	negative	negative	negative	negative	negative	negative	negative	negative	negative
ERR6005510		ERR6005510	100655	The Gambia	West Africa	S. sonnei	S. sonnei	S. sonnei	S. sonnei	negative	positive	positive	negative	negative	negative	negative	negative	negative	negative	negative	negative	negative	negative	negative
ERR6004866		ERR6004866	100669	The Gambia	West Africa	1b	1b	1b	1b	negative	positive	negative	positive	negative	positive	negative	negative	negative	negative	negative	negative	negative	negative	negative
ERR6004867		ERR6004867	100697	The Gambia	West Africa	2a	2a	2a	2a	negative	positive	negative	negative	positive	negative	negative	negative	negative	negative	negative	negative	negative	negative	negative
ERR6004868		ERR6004868	100704	The Gambia	West Africa	3a	3a	3a	3a/5b	negative	positive	negative	negative	negative	negative	positive	positive	negative	negative	negative	negative	negative	negative	negative
ERR6004869		ERR6004869	100706	The Gambia	West Africa	2a	2a	2a	2a	negative	positive	negative	negative	positive	negative	negative	negative	negative	negative	negative	negative	negative	negative	negative
ERR6004870		ERR6004870	100709	The Gambia	West Africa	2a	2a	2a	2a	negative	positive	negative	negative	positive	negative	negative	negative	negative	negative	negative	negative	negative	negative	negative
ERR6004871		ERR6004871	100716	The Gambia	West Africa	2a	2a	2a	2a	negative	positive	negative	negative	positive	negative	negative	negative	negative	negative	negative	negative	negative	negative	negative
ERR6004872		ERR6004872	100724	The Gambia	West Africa	6	6	6	Shigella/EIEC	negative	positive	negative	negative	negative	negative	negative	negative	negative	negative	negative	negative	negative	negative	negative
ERR6004873		ERR6004873	100753	The Gambia	West Africa	2a	2a	2a	2a	negative	positive	negative	negative	positive	negative	negative	negative	negative	negative	negative	negative	negative	negative	negative
ERR6005511		ERR6005511	100781	The Gambia	West Africa	S. sonnei	S. sonnei	S. sonnei	S. sonnei	negative	positive	positive	negative	negative	negative	negative	negative	negative	negative	negative	negative	negative	negative	negative
ERR6004874		ERR6004874	100831	The Gambia	West Africa	2a	2a	2a	2a	negative	positive	negative	negative	positive	negative	negative	negative	negative	negative	negative	negative	negative	negative	negative
ERR6004875		ERR6004875	100835	The Gambia	West Africa	2a	2a	2a	2a	negative	positive	negative	negative	positive	negative	negative	negative	negative	negative	negative	negative	negative	negative	negative
ERR6004876		ERR6004876	100842	The Gambia	West Africa	1b	1b	1b	1b	negative	positive	negative	positive	negative	positive	negative	negative	negative	negative	negative	negative	negative	negative	negative
ERR6004877		ERR6004877	100848	The Gambia	West Africa	3a	1b	1b	1b	negative	positive	negative	positive	negative	positive	negative	negative	negative	negative	negative	negative	negative	negative	negative
ERR6005078		ERR6005078	100852	The Gambia	West Africa	1c(7a)	2a	2a	2a	negative	positive	negative	negative	positive	negative	negative	negative	negative	negative	negative	negative	negative	negative	negative
ERR6004878		ERR6004878	100855	The Gambia	West Africa	2a	2a	2a	2a	negative	positive	negative	negative	positive	negative	negative	negative	negative	negative	negative	negative	negative	negative	negative
ERR6004879		ERR6004879	100868	The Gambia	West Africa	2a	2a	2a	2a	negative	positive	negative	negative	positive	negative	negative	negative	negative	negative	negative	negative	negative	negative	negative
ERR6005512		ERR6005512	100882	The Gambia	West Africa	S. sonnei	S. sonnei	S. sonnei	S. sonnei	negative	positive	positive	negative	negative	negative	negative	negative	negative	negative	negative	negative	negative	negative	negative
ERR6004880		ERR6004880	102002	The Gambia	West Africa	6	6	6	Shigella/EIEC	negative	positive	negative	negative	negative	negative	negative	negative	negative	negative	negative	negative	negative	negative	negative
ERR6004881		ERR6004881	102017	The Gambia	West Africa	2a	2a	2a	2a	negative	positive	negative	negative	positive	negative	negative	negative	negative	negative	negative	negative	negative	negative	negative
ERR6004882		ERR6004882	102070	The Gambia	West Africa	1b	1b	1b	1b	negative	positive	negative	positive	negative	positive	negative	negative	negative	negative	negative	negative	negative	negative	negative
ERR6005079		ERR6005079	102075	The Gambia	West Africa	X	Xv(4c)	Xv	X/Xv	negative	positive	negative	negative	negative	negative	negative	positive	negative	negative	negative	negative	negative	negative	negative
ERR6005514		ERR6005514	102159	The Gambia	West Africa	S. sonnei	S. sonnei	S. sonnei	S. sonnei	negative	positive	positive	negative	negative	negative	negative	negative	negative	negative	negative	negative	negative	negative	negative
ERR6005080		ERR6005080	102241	The Gambia	West Africa	1b	1b	1b	1b	negative	positive	negative	positive	negative	positive	negative	negative	negative	negative	negative	negative	negative	negative	negative
ERR6005081		ERR6005081	102263	The Gambia	West Africa	2a	2a	2a	2a	negative	positive	negative	negative	positive	negative	negative	negative	negative	negative	negative	negative	negative	negative	negative
ERR6005082		ERR6005082	102295	The Gambia	West Africa	2a	2a	2a	2a	negative	positive	negative	negative	positive	negative	negative	negative	negative	negative	negative	negative	negative	negative	negative
ERR6005599		ERR6005599	102306	The Gambia	West Africa	S. sonnei	S. sonnei	S. sonnei	S. sonnei	negative	positive	positive	negative	negative	negative	negative	negative	negative	negative	negative	negative	negative	negative	negative
ERR6005600		ERR6005600	102345	The Gambia	West Africa	S. sonnei	S. sonnei	S. sonnei	S. sonnei	negative	positive	positive	negative	negative	negative	negative	negative	negative	negative	negative	negative	negative	negative	negative
ERR6005084		ERR6005084	102349	The Gambia	West Africa	1b	1b	1b	1b	negative	positive	negative	positive	negative	positive	negative	negative	negative	negative	negative	negative	negative	negative	negative
ERR6005601		ERR6005601	102381	The Gambia	West Africa	S. sonnei	S. sonnei	S. sonnei	S. sonnei	negative	positive	positive	negative	negative	negative	negative	negative	negative	negative	negative	negative	negative	negative	negative
ERR6005085		ERR6005085	102395	The Gambia	West Africa	2a	2a	2a	2a	negative	positive	negative	negative	positive	negative	negative	negative	negative	negative	negative	negative	negative	negative	negative
ERR6005086	ERR6006186	Merged	102431	The Gambia	West Africa	1b	Novel	1b	1b	negative	positive	negative	positive	negative	positive	negative	negative	negative	negative	negative	negative	negative	negative	negative
ERR6005087		ERR6005087	102476	The Gambia	West Africa	6	6	6	Shigella/EIEC	negative	positive	negative	negative	negative	negative	negative	negative	negative	negative	negative	negative	negative	negative	negative
ERR6005603	ERR6006187	Merged	102479	The Gambia	West Africa	S. sonnei	S. sonnei	S. sonnei	S. sonnei	negative	positive	positive	negative	negative	negative	negative	negative	negative	negative	negative	negative	negative	negative	negative
ERR6005083		ERR6005083	102491	The Gambia	West Africa	6	6	6	Shigella/EIEC	negative	positive	negative	negative	negative	negative	negative	negative	negative	negative	negative	negative	negative	negative	negative
ERR6005089		ERR6005089	102493	The Gambia	West Africa	3a	3a	3a	3a/5b	negative	positive	negative	negative	negative	negative	positive	positive	negative	negative	negative	negative	negative	negative	negative
ERR6005088	ERR6006188	ERR6005088	102499	The Gambia	West Africa	1b	1b	1b	1b	negative	positive	negative	positive	negative	positive	negative	negative	negative	negative	negative	negative	negative	negative	negative
ERR6005090		ERR6005090	102533	The Gambia	West Africa	1b	1b	1b	1b	negative	positive	negative	positive	negative	positive	negative	negative	negative	negative	negative	negative	negative	negative	negative
ERR6005094		ERR6005094	102574	The Gambia	West Africa	2a	2a	2a	2a	negative	positive	negative	negative	positive	negative	negative	negative	negative	negative	negative	negative	negative	negative	negative
ERR6005096		ERR6005096	102592	The Gambia	West Africa	2a	2a	2a	2a	negative	positive	negative	negative	positive	negative	negative	negative	negative	negative	negative	negative	negative	negative	negative
ERR6005605		ERR6005605	102594	The Gambia	West Africa	S. sonnei	S. sonnei	S. sonnei	S. sonnei	negative	positive	positive	negative	negative	negative	negative	negative	negative	negative	negative	negative	negative	negative	negative
ERR6005093		ERR6005093	102609	The Gambia	West Africa	6	6	6	Shigella/EIEC	negative	positive	negative	negative	negative	negative	negative	negative	negative	negative	negative	negative	negative	negative	negative
ERR6005602	ERR6006190	Merged	102636	The Gambia	West Africa	S. sonnei	S. sonnei	S. sonnei	S. sonnei	negative	positive	positive	negative	negative	negative	negative	negative	negative	negative	negative	negative	negative	negative	negative
ERR6005091		ERR6005091	102664	The Gambia	West Africa	6	6	6	Shigella/EIEC	negative	positive	negative	negative	negative	negative	negative	negative	negative	negative	negative	negative	negative	negative	negative
ERR6005105		ERR6005105	102751	The Gambia	West Africa	6	6	6	Shigella/EIEC	negative	positive	negative	negative	negative	negative	negative	negative	negative	negative	negative	negative	negative	negative	negative
ERR6005100	ERR6006192	Merged	102759	The Gambia	West Africa	1b	1b	1b	Shigella/EIEC	negative	positive	positive	positive	negative	positive	negative	negative	negative	negative	negative	negative	negative	negative	negative
ERR6005097		ERR6005097	102763	The Gambia	West Africa	2a	2a	2a	2a	negative	positive	negative	negative	positive	negative	negative	negative	negative	negative	negative	negative	negative	negative	negative
ERR6005606		ERR6005606	102783	The Gambia	West Africa	S. sonnei	S. sonnei	S. sonnei	S. sonnei	negative	positive	positive	negative	negative	negative	negative	negative	negative	negative	negative	negative	negative	negative	negative
ERR6005607		ERR6005607	102809	The Gambia	West Africa	S. sonnei	S. sonnei	S. sonnei	S. sonnei	negative	positive	positive	negative	negative	negative	negative	negative	negative	negative	negative	negative	negative	negative	negative
ERR6005098		ERR6005098	102820	The Gambia	West Africa	2a	2a	2a	2a	negative	positive	negative	negative	positive	negative	negative	negative	negative	negative	negative	negative	negative	negative	negative
ERR6005101		ERR6005101	102824	The Gambia	West Africa	1b	1b	1b	1b	negative	positive	negative	positive	negative	positive	negative	negative	negative	negative	negative	negative	negative	negative	negative
ERR6005095		ERR6005095	102844	The Gambia	West Africa	X	Xv(4c)	Xv	X/Xv	negative	positive	negative	negative	negative	negative	negative	positive	negative	negative	negative	negative	negative	negative	negative
ERR6005099		ERR6005099	102854	The Gambia	West Africa	2a	2a	2a	2a	negative	positive	negative	negative	positive	negative	negative	negative	negative	negative	negative	negative	negative	negative	negative
ERR6005102		ERR6005102	102860	The Gambia	West Africa	2a	2a	2a	2a	negative	positive	negative	negative	positive	negative	negative	negative	negative	negative	negative	negative	negative	negative	negative
ERR6005103		ERR6005103	102926	The Gambia	West Africa	3a	3a	3b	3a/5b	negative	positive	negative	negative	negative	negative	positive	positive	negative	negative	negative	negative	negative	negative	negative
ERR6005104		ERR6005104	102933	The Gambia	West Africa	2a	2a	2a	2a	negative	positive	negative	negative	positive	negative	negative	negative	negative	negative	negative	negative	negative	negative	negative
ERR6005107		ERR6005107	102979	The Gambia	West Africa	2a	2a	2a	2a	negative	positive	negative	negative	positive	negative	negative	negative	negative	negative	negative	negative	negative	negative	negative
ERR6005109		ERR6005109	102982	The Gambia	West Africa	2a	2a	2a	2a	negative	positive	negative	negative	positive	negative	negative	negative	negative	negative	negative	negative	negative	negative	negative
ERR6005110		ERR6005110	102996	The Gambia	West Africa	3a	3a	3b	3a/5b	negative	positive	negative	negative	negative	negative	positive	positive	negative	negative	negative	negative	negative	negative	negative
ERR6005111		ERR6005111	102997	The Gambia	West Africa	2a	2a	2a	2a	negative	positive	negative	negative	positive	negative	negative	negative	negative	negative	negative	negative	negative	negative	negative
ERR6005609	ERR6006193	Merged	103008	The Gambia	West Africa	S. sonnei	S. sonnei	S. sonnei	S. sonnei	negative	positive	positive	negative	negative	negative	negative	negative	negative	negative	negative	negative	negative	negative	negative
ERR6005610		ERR6005610	103013	The Gambia	West Africa	S. sonnei	S. sonnei	S. sonnei	S. sonnei	negative	positive	positive	negative	negative	negative	negative	negative	negative	negative	negative	negative	negative	negative	negative
ERR6005112		ERR6005112	103015	The Gambia	West Africa	2b	Novel	2b	2b	negative	positive	negative	negative	positive	negative	negative	positive	negative	negative	negative	negative	negative	negative	negative
ERR6005113		ERR6005113	103163	The Gambia	West Africa	2b	2b	2b	2b	negative	positive	negative	negative	positive	negative	negative	positive	negative	negative	negative	negative	negative	negative	negative
ERR6005114		ERR6005114	103198	The Gambia	West Africa	2a	2a	2a	2a	negative	positive	negative	negative	positive	negative	negative	negative	negative	negative	negative	negative	negative	negative	negative
ERR6005108		ERR6005108	103218	The Gambia	West Africa	2a	2a	2a	2a	negative	positive	negative	negative	positive	negative	negative	negative	negative	negative	negative	negative	negative	negative	negative
ERR6005274		ERR6005274	103229	The Gambia	West Africa	1b	1b	1b	1b	negative	positive	negative	positive	negative	positive	negative	negative	negative	negative	negative	negative	negative	negative	negative
ERR6005279		ERR6005279	103265	The Gambia	West Africa	6	6	6	Shigella/EIEC	negative	positive	negative	negative	negative	negative	negative	negative	negative	negative	negative	negative	negative	negative	negative
ERR6005275		ERR6005275	103268	The Gambia	West Africa	2a	2a	2a	2a	negative	positive	negative	negative	positive	negative	negative	negative	negative	negative	negative	negative	negative	negative	negative
ERR6005276		ERR6005276	103288	The Gambia	West Africa	2b	2b	2b	2b	negative	positive	negative	negative	positive	negative	negative	positive	negative	negative	negative	negative	negative	negative	negative
ERR6005286	ERR6006195	Merged	103294	The Gambia	West Africa	1b	1b	1b	1b	negative	positive	negative	positive	negative	positive	negative	negative	negative	negative	negative	negative	negative	negative	negative
ERR6005282		ERR6005282	103295	The Gambia	West Africa	2a	2a	2a	2a	negative	positive	negative	negative	positive	negative	negative	negative	negative	negative	negative	negative	negative	negative	negative
ERR6005277		ERR6005277	103303	The Gambia	West Africa	2b	2b	2b	2b	negative	positive	negative	negative	positive	negative	negative	positive	negative	negative	negative	negative	negative	negative	negative
ERR6005278		ERR6005278	103315	The Gambia	West Africa	X	Xv(4c)	Yv	X/Xv	negative	positive	negative	negative	negative	negative	negative	positive	negative	negative	negative	negative	negative	negative	negative
ERR6005281		ERR6005281	103333	The Gambia	West Africa	3a	3a	3a	3a/5b	negative	positive	negative	negative	negative	negative	positive	positive	negative	negative	negative	negative	negative	negative	negative
ERR6005283		ERR6005283	103339	The Gambia	West Africa	1b	1b	1b	1b	negative	positive	negative	positive	negative	positive	negative	negative	negative	negative	negative	negative	negative	negative	negative
ERR6005682		ERR6005682	103366	The Gambia	West Africa	S. sonnei	S. sonnei	S. sonnei	S. sonnei	negative	positive	positive	negative	negative	negative	negative	negative	negative	negative	negative	negative	negative	negative	negative
ERR6005290		ERR6005290	103367	The Gambia	West Africa	6	6	6	Shigella/EIEC	negative	positive	negative	negative	negative	negative	negative	negative	negative	negative	negative	negative	negative	negative	negative
ERR6005284		ERR6005284	103369	The Gambia	West Africa	2a	2a	2a	2a	negative	positive	negative	negative	positive	negative	negative	negative	negative	negative	negative	negative	negative	negative	negative
ERR6005681		ERR6005681	103408	The Gambia	West Africa	S. sonnei	S. sonnei	S. sonnei	S. sonnei	negative	positive	positive	negative	negative	negative	negative	negative	negative	negative	negative	negative	negative	negative	negative
ERR6005287		ERR6005287	103413	The Gambia	West Africa	2a	2a	2a	2a	negative	positive	negative	negative	positive	negative	negative	negative	negative	negative	negative	negative	negative	negative	negative
ERR6005289		ERR6005289	103435	The Gambia	West Africa	2a	2av	2a	2a	negative	positive	negative	negative	positive	negative	negative	negative	negative	negative	negative	negative	negative	negative	negative
ERR6005291		ERR6005291	103437	The Gambia	West Africa	2a	2a	2a	2a	negative	positive	negative	negative	positive	negative	negative	negative	negative	negative	negative	negative	negative	negative	negative
ERR6005292		ERR6005292	103446	The Gambia	West Africa	2a	2a	2a	2a	negative	positive	negative	negative	positive	negative	negative	negative	negative	negative	negative	negative	negative	negative	negative
ERR6005294		ERR6005294	103489	The Gambia	West Africa	1b	1b	1b	1b	negative	positive	negative	positive	negative	positive	negative	negative	negative	negative	negative	negative	negative	negative	negative
ERR6005280		ERR6005280	103558	The Gambia	West Africa	1b	1b	1b	1b	negative	positive	negative	positive	negative	positive	negative	negative	negative	negative	negative	negative	negative	negative	negative
ERR6005355		ERR6005355	103578	The Gambia	West Africa	6	6	6	Shigella/EIEC	negative	positive	negative	negative	negative	negative	negative	negative	negative	negative	negative	negative	negative	negative	negative
ERR6005409		ERR6005409	103596	The Gambia	West Africa	1b	1b	1a	1b	negative	positive	negative	positive	negative	positive	negative	negative	negative	negative	negative	negative	negative	negative	negative
ERR6005356		ERR6005356	103612	The Gambia	West Africa	1b	1b	1b	1b	negative	positive	negative	positive	negative	positive	negative	negative	negative	negative	negative	negative	negative	negative	negative
ERR6005354		ERR6005354	103619	The Gambia	West Africa	1b	1b	1b	1b	negative	positive	negative	positive	negative	positive	negative	negative	negative	negative	negative	negative	negative	negative	negative
ERR6005408		ERR6005408	103625	The Gambia	West Africa	1b	1b	1b	1b	negative	positive	negative	positive	negative	positive	negative	negative	negative	negative	negative	negative	negative	negative	negative
ERR6005357	ERR6006196	Merged	103651	The Gambia	West Africa	1b	No prediction	1b	1b	negative	positive	negative	positive	negative	positive	negative	negative	negative	negative	negative	negative	negative	negative	negative
ERR6005736		ERR6005736	103705	The Gambia	West Africa	S. sonnei	S. sonnei	S. sonnei	S. sonnei	negative	positive	positive	negative	negative	negative	negative	negative	negative	negative	negative	negative	negative	negative	negative
ERR6005737	ERR6006197	Merged	103706	The Gambia	West Africa	S. sonnei	EIEC	S. sonnei	S. sonnei	negative	positive	positive	negative	negative	negative	negative	negative	negative	negative	negative	negative	negative	negative	negative
ERR6005358		ERR6005358	103708	The Gambia	West Africa	2a	2a	2a	2a	negative	positive	negative	negative	positive	negative	negative	negative	negative	negative	negative	negative	negative	negative	negative
ERR6004672	ERR6006198	Merged	200046	Mali	West Africa	2a	2a	2a	2a	negative	positive	negative	negative	positive	negative	negative	negative	negative	negative	negative	negative	negative	negative	negative
ERR6004675		ERR6004675	200071	Mali	West Africa	2a	2a	2a	2a	negative	positive	negative	negative	positive	negative	negative	negative	negative	negative	negative	negative	negative	negative	negative
ERR6004673	ERR6006199	Merged	200181	Mali	West Africa	3a	3a	3a	3a/5b	negative	positive	negative	negative	negative	negative	positive	positive	negative	negative	negative	negative	negative	negative	negative
ERR6004671		ERR6004671	200185	Mali	West Africa	4a	Xv(4c)	Xv	X/Xv	negative	positive	negative	negative	negative	negative	negative	positive	negative	negative	negative	negative	negative	negative	negative
ERR6004676		ERR6004676	200194	Mali	West Africa	1b	1b	1b	1b	negative	positive	negative	positive	negative	positive	negative	negative	negative	negative	negative	negative	negative	negative	negative
ERR6005398	ERR6006200	Merged	200200	Mali	West Africa	2b	2b	2b	2b	negative	positive	negative	negative	positive	negative	negative	positive	negative	negative	negative	negative	negative	negative	negative
ERR6004674		ERR6004674	200204	Mali	West Africa	1b	1b	1b	1b	negative	positive	negative	positive	negative	positive	negative	negative	negative	negative	negative	negative	negative	negative	negative
ERR6004677	ERR6006201	Merged	200294	Mali	West Africa	2b	2b	2b	2b	negative	positive	negative	negative	positive	negative	negative	positive	negative	negative	negative	negative	negative	negative	negative
ERR6005449		ERR6005449	200308	Mali	West Africa	S. sonnei	S. sonnei	S. sonnei	S. sonnei	negative	positive	positive	negative	negative	negative	negative	negative	negative	negative	negative	negative	negative	negative	negative
ERR6005450	ERR6006202	Merged	200470	Mali	West Africa	S. sonnei	S. sonnei	S. sonnei	S. sonnei	negative	positive	positive	negative	negative	negative	negative	negative	negative	negative	negative	negative	negative	negative	negative
ERR6005663		ERR6005663	200527	Mali	West Africa	S. sonnei	S. sonnei	S. sonnei	S. sonnei	negative	positive	positive	negative	negative	negative	negative	negative	negative	negative	negative	negative	negative	negative	negative
ERR6005242	ERR6006203	Merged	200923	Mali	West Africa	1b	Novel	Unknown	Shigella/EIEC	negative	positive	negative	positive	positive	positive	negative	positive	negative	negative	negative	negative	negative	negative	negative
ERR6005243		ERR6005243	201152	Mali	West Africa	2a	2a	2a	2a	negative	positive	negative	negative	positive	negative	negative	negative	negative	negative	negative	negative	negative	negative	negative
ERR6005244		ERR6005244	201203	Mali	West Africa	2a	2a	2a	2a	negative	positive	negative	negative	positive	negative	negative	negative	negative	negative	negative	negative	negative	negative	negative
ERR6005239		ERR6005239	201232	India	South Asia	2b	2b	2b	2b	negative	positive	negative	negative	positive	negative	negative	positive	negative	negative	negative	negative	negative	negative	negative
ERR6005245		ERR6005245	201355	Mali	West Africa	1b	1b	1b	1b	negative	positive	negative	positive	negative	positive	negative	negative	negative	negative	negative	negative	negative	negative	negative
ERR6005664		ERR6005664	201661	Mali	West Africa	S. sonnei	S. sonnei	S. sonnei	S. sonnei	negative	positive	positive	negative	negative	negative	negative	negative	negative	negative	negative	negative	negative	negative	negative
ERR6005247		ERR6005247	201692	Mali	West Africa	1b	1b	1b	1b	negative	positive	negative	positive	negative	positive	negative	negative	negative	negative	negative	negative	negative	negative	negative
ERR6005248		ERR6005248	202052	Mali	West Africa	X	Xv(4c)	Xv	X/Xv	negative	positive	negative	negative	negative	negative	negative	positive	negative	negative	negative	negative	negative	negative	negative
ERR6005249		ERR6005249	202113	Mali	West Africa	2b	2b	2b	2b	negative	positive	negative	negative	positive	negative	negative	positive	negative	negative	negative	negative	negative	negative	negative
ERR6005251	ERR6006206	Merged	202130	Mali	West Africa	1b	1b	1b	1b	negative	positive	negative	positive	negative	positive	negative	negative	negative	negative	negative	negative	negative	negative	negative
ERR6005252		ERR6005252	202156	Mali	West Africa	2a	2a	2a	2a	negative	positive	negative	negative	positive	negative	negative	negative	negative	negative	negative	negative	negative	negative	negative
ERR6005253		ERR6005253	202236	Mali	West Africa	6	6	6	Shigella/EIEC	negative	positive	negative	negative	negative	negative	negative	negative	negative	negative	negative	negative	negative	negative	negative
ERR6005254		ERR6005254	202260	Mali	West Africa	6	6	6	Shigella/EIEC	negative	positive	negative	negative	negative	negative	negative	negative	negative	negative	negative	negative	negative	negative	negative
ERR6005255		ERR6005255	202274	Mali	West Africa	3a	3a	3a	3a/5b	negative	positive	negative	negative	negative	negative	positive	positive	negative	negative	negative	negative	negative	negative	negative
ERR6005672		ERR6005672	202285	Mali	West Africa	S. sonnei	S. sonnei	S. sonnei	S. sonnei	negative	positive	positive	negative	negative	negative	negative	negative	negative	negative	negative	negative	negative	negative	negative
ERR6005665		ERR6005665	202510	Mali	West Africa	S. sonnei	S. sonnei	S. sonnei	S. sonnei	negative	positive	positive	negative	negative	negative	negative	negative	negative	negative	negative	negative	negative	negative	negative
ERR6005666		ERR6005666	202721	Mali	West Africa	S. sonnei	S. sonnei	S. sonnei	S. sonnei	negative	positive	positive	negative	negative	negative	negative	negative	negative	negative	negative	negative	negative	negative	negative
ERR6005256		ERR6005256	203032	Mali	West Africa	2a	2a	2a	2a	negative	positive	negative	negative	positive	negative	negative	negative	negative	negative	negative	negative	negative	negative	negative
ERR6005250		ERR6005250	203168	Mali	West Africa	1b	1b	1b	1b	negative	positive	negative	positive	negative	positive	negative	negative	negative	negative	negative	negative	negative	negative	negative
ERR6005257		ERR6005257	203270	Mali	West Africa	X	Xv(4c)	Xv	X/Xv	negative	positive	negative	negative	negative	negative	negative	positive	negative	negative	negative	negative	negative	negative	negative
ERR6005258		ERR6005258	203534	Mali	West Africa	1b	1b	1b	1b	negative	positive	negative	positive	negative	positive	negative	negative	negative	negative	negative	negative	negative	negative	negative
ERR6005667		ERR6005667	203745	Mali	West Africa	S. sonnei	S. sonnei	S. sonnei	S. sonnei	negative	positive	positive	negative	negative	negative	negative	negative	negative	negative	negative	negative	negative	negative	negative
ERR6005669		ERR6005669	203836	Mali	West Africa	S. sonnei	S. sonnei	S. sonnei	S. sonnei	negative	positive	positive	negative	negative	negative	negative	negative	negative	negative	negative	negative	negative	negative	negative
ERR6005670	ERR6006207	Merged	203864	Mali	West Africa	S. sonnei	S. sonnei	S. sonnei	S. sonnei	negative	positive	positive	negative	negative	negative	negative	negative	negative	negative	negative	negative	negative	negative	negative
ERR6005353		ERR6005353	203977	Mali	West Africa	1b	1b	1b	1b	negative	positive	negative	positive	negative	positive	negative	negative	negative	negative	negative	negative	negative	negative	negative
ERR6005671	ERR6006208	Merged	203982	Mali	West Africa	S. sonnei	S. sonnei	S. sonnei	S. sonnei	negative	positive	positive	negative	negative	negative	negative	negative	negative	negative	negative	negative	negative	negative	negative
ERR6005259		ERR6005259	204161	Mali	West Africa	6	6	6	Shigella/EIEC	negative	positive	negative	negative	negative	negative	negative	negative	negative	negative	negative	negative	negative	negative	negative
ERR6005261		ERR6005261	204210	Mali	West Africa	3a	3a	3a	3a/5b	negative	positive	negative	negative	negative	negative	positive	positive	negative	negative	negative	negative	negative	negative	negative
ERR6005673		ERR6005673	204219	Mali	West Africa	S. sonnei	S. sonnei	S. sonnei	S. sonnei	negative	positive	positive	negative	negative	negative	negative	negative	negative	negative	negative	negative	negative	negative	negative
ERR6005735	ERR6006210	Merged	204354	Mali	West Africa	S. sonnei	No prediction	S. sonnei	Shigella/EIEC	negative	positive	positive	negative	positive	negative	negative	negative	negative	negative	negative	negative	negative	negative	negative
ERR6005407		ERR6005407	204584	Mali	West Africa	1b	1b	1b	1a/1c(7a)	negative	positive	negative	positive	negative	negative	negative	negative	negative	negative	negative	negative	negative	negative	negative
ERR6004703		ERR6004703	300013	Mozambique	East Africa	2a	2a	2a	2a	negative	positive	negative	negative	positive	negative	negative	negative	negative	negative	negative	negative	negative	negative	negative
ERR6004932		ERR6004932	300020	Mozambique	East Africa	2a	2a	2a	2a	negative	positive	negative	negative	positive	negative	negative	negative	negative	negative	negative	negative	negative	negative	negative
ERR6004937		ERR6004937	300035	Mozambique	East Africa	2a	2a	2a	2a	negative	positive	negative	negative	positive	negative	negative	negative	negative	negative	negative	negative	negative	negative	negative
ERR6004704		ERR6004704	300039	Mozambique	East Africa	6	6	6	Shigella/EIEC	negative	positive	negative	negative	negative	negative	negative	negative	negative	negative	negative	negative	negative	negative	negative
ERR6004705		ERR6004705	300101	Mozambique	East Africa	2a	No prediction	2a	2a	negative	positive	negative	negative	positive	negative	negative	negative	negative	negative	negative	negative	negative	negative	negative
ERR6004708	ERR6006211	Merged	300111	Mozambique	East Africa	2a	2b	2b	2a	negative	positive	negative	negative	positive	negative	negative	negative	negative	negative	negative	negative	negative	negative	negative
ERR6005539		ERR6005539	300116	Mozambique	East Africa	S. sonnei	S. sonnei	S. sonnei	S. sonnei	negative	positive	positive	negative	negative	negative	negative	negative	negative	negative	negative	negative	negative	negative	negative
ERR6004709		ERR6004709	300117	Mozambique	East Africa	2a	2a	2a	2a	negative	positive	negative	negative	positive	negative	negative	negative	negative	negative	negative	negative	negative	negative	negative
ERR6004710		ERR6004710	300119	Mozambique	East Africa	2a	2a	2a	2a	negative	positive	negative	negative	positive	negative	negative	negative	negative	negative	negative	negative	negative	negative	negative
ERR6004933		ERR6004933	300209	Mozambique	East Africa	3a	3a	3a	3a/5b	negative	positive	negative	negative	negative	negative	positive	positive	negative	negative	negative	negative	negative	negative	negative
ERR6004711		ERR6004711	300220	Mozambique	East Africa	6	6	6	Shigella/EIEC	negative	positive	negative	negative	negative	negative	negative	negative	negative	negative	negative	negative	negative	negative	negative
ERR6004712		ERR6004712	300244	Mozambique	East Africa	2a	2a	2a	2a	negative	positive	negative	negative	positive	negative	negative	negative	negative	negative	negative	negative	negative	negative	negative
ERR6005399		ERR6005399	300501	Mozambique	East Africa	3a	3a	3a	3a/5b	negative	positive	negative	negative	negative	negative	positive	positive	negative	negative	negative	negative	negative	negative	negative
ERR6004706		ERR6004706	300730	Mozambique	East Africa	6	6	6	Shigella/EIEC	negative	positive	negative	negative	negative	negative	negative	negative	negative	negative	negative	negative	negative	negative	negative
ERR6004713		ERR6004713	300732	Mozambique	East Africa	6	2a	2a	2a	negative	positive	negative	negative	positive	negative	negative	negative	negative	negative	negative	negative	negative	negative	negative
ERR6005393	ERR6006214	Merged	302122	Mozambique	East Africa	X	Novel	Unknown	2b	negative	positive	negative	negative	positive	negative	negative	positive	negative	negative	negative	negative	negative	negative	negative
ERR6005392	ERR6006215	Merged	302123	Mozambique	East Africa	1b	Novel	Unknown	Shigella/EIEC	negative	positive	negative	positive	negative	positive	positive	positive	negative	negative	negative	negative	negative	negative	negative
ERR6004939		ERR6004939	302229	Mozambique	East Africa	X	Xv(4c)	Xv	X/Xv	negative	positive	negative	negative	negative	negative	negative	positive	negative	negative	negative	negative	negative	negative	negative
ERR6005391		ERR6005391	302524	Mozambique	East Africa	2a	2av	2a	2a	negative	positive	negative	negative	positive	negative	negative	negative	negative	negative	negative	negative	negative	negative	negative
ERR6004936		ERR6004936	302663	Mozambique	East Africa	1b	1b	1b	1b	negative	positive	negative	positive	negative	positive	negative	negative	negative	negative	negative	negative	negative	negative	negative
ERR6004935		ERR6004935	302672	Mozambique	East Africa	2a	2a	2a	2a	negative	positive	negative	negative	positive	negative	negative	negative	negative	negative	negative	negative	negative	negative	negative
ERR6005625		ERR6005625	302755	Mozambique	East Africa	S. sonnei	S. sonnei	S. sonnei	S. sonnei	negative	positive	positive	negative	negative	negative	negative	negative	negative	negative	negative	negative	negative	negative	negative
ERR6005624		ERR6005624	302912	Mozambique	East Africa	S. sonnei	S. sonnei	S. sonnei	S. sonnei	negative	positive	positive	negative	negative	negative	negative	negative	negative	negative	negative	negative	negative	negative	negative
ERR6005406		ERR6005406	303061	Mozambique	East Africa	2a	2a	2a	2a	negative	positive	negative	negative	positive	negative	negative	negative	negative	negative	negative	negative	negative	negative	negative
ERR6005311		ERR6005311	303146	Mozambique	East Africa	1b	1b	1b	1b	negative	positive	negative	positive	negative	positive	negative	negative	negative	negative	negative	negative	negative	negative	negative
ERR6005313		ERR6005313	303226	Mozambique	East Africa	2a	2a	2a	2a	negative	positive	negative	negative	positive	negative	negative	negative	negative	negative	negative	negative	negative	negative	negative
ERR6005351		ERR6005351	303287	Mozambique	East Africa	1b	1b	1b	1b	negative	positive	negative	positive	negative	positive	negative	negative	negative	negative	negative	negative	negative	negative	negative
ERR6005352	ERR6006216	Merged	303291	Mozambique	East Africa	6	No prediction	6	Shigella/EIEC	negative	positive	negative	negative	negative	negative	negative	negative	negative	negative	negative	negative	negative	negative	negative
ERR6005452		ERR6005452	400542	Kenya	East Africa	S. sonnei	S. sonnei	S. sonnei	S. sonnei	negative	positive	positive	negative	negative	negative	negative	negative	negative	negative	negative	negative	negative	negative	negative
ERR6004679		ERR6004679	400565	Kenya	East Africa	2b	2b	2b	2b	negative	positive	negative	negative	positive	negative	negative	positive	negative	negative	negative	negative	negative	negative	negative
ERR6004680		ERR6004680	400566	Kenya	East Africa	6	6	6	Shigella/EIEC	negative	positive	negative	negative	negative	negative	negative	negative	negative	negative	negative	negative	negative	negative	negative
ERR6004683		ERR6004683	400576	Kenya	East Africa	1b	1b	1b	1b	negative	positive	negative	positive	negative	positive	negative	negative	negative	negative	negative	negative	negative	negative	negative
ERR6004681		ERR6004681	400603	Kenya	East Africa	6	6	6	Shigella/EIEC	negative	positive	negative	negative	negative	negative	negative	negative	negative	negative	negative	negative	negative	negative	negative
ERR6004687		ERR6004687	400613	Kenya	East Africa	6	6	6	Shigella/EIEC	negative	positive	negative	negative	negative	negative	negative	negative	negative	negative	negative	negative	negative	negative	negative
ERR6005457		ERR6005457	400655	Kenya	East Africa	S. sonnei	S. sonnei	S. sonnei	S. sonnei	negative	positive	positive	negative	negative	negative	negative	negative	negative	negative	negative	negative	negative	negative	negative
ERR6005451		ERR6005451	400767	Kenya	East Africa	S. sonnei	S. sonnei	S. sonnei	S. sonnei	negative	positive	positive	negative	negative	negative	negative	negative	negative	negative	negative	negative	negative	negative	negative
ERR6004685		ERR6004685	400822	Kenya	East Africa	6	6	6	Shigella/EIEC	negative	positive	negative	negative	negative	negative	negative	negative	negative	negative	negative	negative	negative	negative	negative
ERR6004688		ERR6004688	400828	Kenya	East Africa	1b	1b	1b	1b	negative	positive	negative	positive	negative	positive	negative	negative	negative	negative	negative	negative	negative	negative	negative
ERR6004690		ERR6004690	400834	Kenya	East Africa	6	6	6	Shigella/EIEC	negative	positive	negative	negative	negative	negative	negative	negative	negative	negative	negative	negative	negative	negative	negative
ERR6004691		ERR6004691	400868	Kenya	East Africa	3a	3a	3a	3a/5b	negative	positive	negative	negative	negative	negative	positive	positive	negative	negative	negative	negative	negative	negative	negative
ERR6004694		ERR6004694	400877	Kenya	East Africa	2a	2a	2a	2a	negative	positive	negative	negative	positive	negative	negative	negative	negative	negative	negative	negative	negative	negative	negative
ERR6004686		ERR6004686	400891	Kenya	East Africa	6	6	6	Shigella/EIEC	negative	positive	negative	negative	negative	negative	negative	negative	negative	negative	negative	negative	negative	negative	negative
ERR6005134	ERR6006222	Merged	400910	Kenya	East Africa	6	6	6	Shigella/EIEC	negative	positive	negative	negative	negative	negative	negative	negative	negative	negative	negative	negative	negative	negative	negative
ERR6004682	ERR6006223	Merged	400918	Kenya	East Africa	6	6	6	Shigella/EIEC	negative	positive	negative	negative	negative	negative	negative	negative	negative	negative	negative	negative	negative	negative	negative
ERR6005403		ERR6005403	400924	Kenya	East Africa	4a	4av	4av	Shigella/EIEC	negative	positive	negative	negative	negative	negative	negative	negative	negative	negative	negative	negative	negative	negative	negative
ERR6004919		ERR6004919	400940	Kenya	East Africa	1c(7a)	1c(7a)	1c(7a)	1a/1c(7a)	negative	positive	negative	positive	negative	negative	negative	negative	negative	negative	negative	negative	negative	negative	negative
ERR6005458		ERR6005458	400975	Kenya	East Africa	S. sonnei	S. sonnei	S. sonnei	S. sonnei	negative	positive	positive	negative	negative	negative	negative	negative	negative	negative	negative	negative	negative	negative	negative
ERR6004692	ERR6006224	Merged	401000	Kenya	East Africa	1b	EIEC	1b	1b	negative	positive	negative	positive	negative	positive	negative	negative	negative	negative	negative	negative	negative	negative	negative
ERR6004693		ERR6004693	401001	Kenya	East Africa	1b	1b	1b	1b	negative	positive	negative	positive	negative	positive	negative	negative	negative	negative	negative	negative	negative	negative	negative
ERR6004696		ERR6004696	401016	Kenya	East Africa	6	6	6	Shigella/EIEC	negative	positive	negative	negative	negative	negative	negative	negative	negative	negative	negative	negative	negative	negative	negative
ERR6004698		ERR6004698	401192	Kenya	East Africa	6	6	6	Shigella/EIEC	negative	positive	negative	negative	negative	negative	negative	negative	negative	negative	negative	negative	negative	negative	negative
ERR6005461		ERR6005461	401266	Kenya	East Africa	S. sonnei	S. sonnei	S. sonnei	S. sonnei	negative	positive	positive	negative	negative	negative	negative	negative	negative	negative	negative	negative	negative	negative	negative
ERR6004913		ERR6004913	401357	Kenya	East Africa	2b	2b	2b	2b	negative	positive	negative	negative	positive	negative	negative	positive	negative	negative	negative	negative	negative	negative	negative
ERR6004914		ERR6004914	401368	Kenya	East Africa	1b	1b	1b	1b	negative	positive	negative	positive	negative	positive	negative	negative	negative	negative	negative	negative	negative	negative	negative
ERR6004912		ERR6004912	401393	Kenya	East Africa	2b	2b	2b	2b	negative	positive	negative	negative	positive	negative	negative	positive	negative	negative	negative	negative	negative	negative	negative
ERR6004697		ERR6004697	401434	Kenya	East Africa	6	6	6	Shigella/EIEC	negative	positive	negative	negative	negative	negative	negative	negative	negative	negative	negative	negative	negative	negative	negative
ERR6004917		ERR6004917	401528	Kenya	East Africa	6	6	6	Shigella/EIEC	negative	positive	negative	negative	negative	negative	negative	negative	negative	negative	negative	negative	negative	negative	negative
ERR6005396		ERR6005396	401555	Kenya	East Africa	1c(7a)	Novel	Unknown	1a/1c(7a)	negative	positive	negative	positive	negative	negative	negative	negative	negative	negative	negative	negative	negative	negative	negative
ERR6005402		ERR6005402	401559	Kenya	East Africa	4a	4av	4av	Shigella/EIEC	negative	positive	negative	negative	negative	negative	negative	negative	negative	negative	negative	negative	negative	negative	negative
ERR6004915		ERR6004915	401640	Kenya	East Africa	1b	1b	1b	1b	negative	positive	negative	positive	negative	positive	negative	negative	negative	negative	negative	negative	negative	negative	negative
ERR6004916		ERR6004916	401649	Kenya	East Africa	1b	1b	1b	1b	negative	positive	negative	positive	negative	positive	negative	negative	negative	negative	negative	negative	negative	negative	negative
ERR6005270		ERR6005270	401652	Kenya	East Africa	2a	2a	2a	2a	negative	positive	negative	negative	positive	negative	negative	negative	negative	negative	negative	negative	negative	negative	negative
ERR6005271		ERR6005271	401674	Kenya	East Africa	1b	1b	1b	1b	negative	positive	negative	positive	negative	positive	negative	negative	negative	negative	negative	negative	negative	negative	negative
ERR6004918		ERR6004918	401781	Kenya	East Africa	1b	1b	1b	1b	negative	positive	negative	positive	negative	positive	negative	negative	negative	negative	negative	negative	negative	negative	negative
ERR6005532		ERR6005532	401835	Kenya	East Africa	S. sonnei	S. sonnei	S. sonnei	S. sonnei	negative	positive	positive	negative	negative	negative	negative	negative	negative	negative	negative	negative	negative	negative	negative
ERR6005679		ERR6005679	401854	Kenya	East Africa	S. sonnei	S. sonnei	S. sonnei	S. sonnei	negative	positive	positive	negative	negative	negative	negative	negative	negative	negative	negative	negative	negative	negative	negative
ERR6004921		ERR6004921	401931	Kenya	East Africa	3a	3a	3a	3a/5b	negative	positive	negative	negative	negative	negative	positive	positive	negative	negative	negative	negative	negative	negative	negative
ERR6004922		ERR6004922	401932	Kenya	East Africa	1c(7a)	1c(7a)	1c(7a)	1a/1c(7a)	negative	positive	negative	positive	negative	negative	negative	negative	negative	negative	negative	negative	negative	negative	negative
ERR6005272		ERR6005272	402001	Kenya	East Africa	6	6	6	Shigella/EIEC	negative	positive	negative	negative	negative	negative	negative	negative	negative	negative	negative	negative	negative	negative	negative
ERR6005533		ERR6005533	402004	Kenya	East Africa	S. sonnei	S. sonnei	S. sonnei	S. sonnei	negative	positive	positive	negative	negative	negative	negative	negative	negative	negative	negative	negative	negative	negative	negative
ERR6005534		ERR6005534	402027	Kenya	East Africa	S. sonnei	S. sonnei	S. sonnei	S. sonnei	negative	positive	positive	negative	negative	negative	negative	negative	negative	negative	negative	negative	negative	negative	negative
ERR6004923		ERR6004923	402041	Kenya	East Africa	1c(7a)	1c(7a)	1c(7a)	1a/1c(7a)	negative	positive	negative	positive	negative	negative	negative	negative	negative	negative	negative	negative	negative	negative	negative
ERR6004924		ERR6004924	402046	Kenya	East Africa	1b	1b	1b	1b	negative	positive	negative	positive	negative	positive	negative	negative	negative	negative	negative	negative	negative	negative	negative
ERR6005404		ERR6005404	402059	Kenya	East Africa	4a	4av	4av	Shigella/EIEC	negative	positive	negative	negative	negative	negative	negative	negative	negative	negative	negative	negative	negative	negative	negative
ERR6004925		ERR6004925	402061	Kenya	East Africa	3a	3a	3a	3a/5b	negative	positive	negative	negative	negative	negative	positive	positive	negative	negative	negative	negative	negative	negative	negative
ERR6004927		ERR6004927	402123	Kenya	East Africa	3a	3a	3a	3a/5b	negative	positive	negative	negative	negative	negative	positive	positive	negative	negative	negative	negative	negative	negative	negative
ERR6004920		ERR6004920	402192	Kenya	East Africa	3a	3a	3a	3a/5b	negative	positive	negative	negative	negative	negative	positive	positive	negative	negative	negative	negative	negative	negative	negative
ERR6004931		ERR6004931	402200	Kenya	East Africa	6	6	6	Shigella/EIEC	negative	positive	negative	negative	negative	negative	negative	negative	negative	negative	negative	negative	negative	negative	negative
ERR6005536		ERR6005536	402210	Kenya	East Africa	S. sonnei	S. sonnei	S. sonnei	S. sonnei	negative	positive	positive	negative	negative	negative	negative	negative	negative	negative	negative	negative	negative	negative	negative
ERR6004928	ERR6006230	Merged	402229	Kenya	East Africa	3a	No prediction	3a	3a/5b	negative	positive	negative	negative	negative	negative	positive	positive	negative	negative	negative	negative	negative	negative	negative
ERR6005535		ERR6005535	402255	Kenya	East Africa	S. sonnei	EIEC	S. sonnei	S. sonnei	negative	positive	positive	negative	negative	negative	negative	negative	negative	negative	negative	negative	negative	negative	negative
ERR6004926		ERR6004926	402257	Kenya	East Africa	2a	2a	2a	2a	negative	positive	negative	negative	positive	negative	negative	negative	negative	negative	negative	negative	negative	negative	negative
ERR6005135		ERR6005135	402311	Kenya	East Africa	1b	1b	1b	1b	negative	positive	negative	positive	negative	positive	negative	negative	negative	negative	negative	negative	negative	negative	negative
ERR6004929		ERR6004929	402347	Kenya	East Africa	1c(7a)	1c(7a)	1c(7a)	1a/1c(7a)	negative	positive	negative	positive	negative	negative	negative	negative	negative	negative	negative	negative	negative	negative	negative
ERR6005115		ERR6005115	402357	Kenya	East Africa	1b	1b	1b	1b	negative	positive	negative	positive	negative	positive	negative	negative	negative	negative	negative	negative	negative	negative	negative
ERR6005405		ERR6005405	402389	Kenya	East Africa	4a	4av	4av	Shigella/EIEC	negative	positive	negative	negative	negative	negative	negative	negative	negative	negative	negative	negative	negative	negative	negative
ERR6005611	ERR6006232	Merged	402400	Kenya	East Africa	S. sonnei	S. sonnei	S. sonnei	S. sonnei	negative	positive	positive	negative	negative	negative	negative	negative	negative	negative	negative	negative	negative	negative	negative
ERR6005116		ERR6005116	402429	Kenya	East Africa	1b	1b	1b	1b	negative	positive	negative	positive	negative	positive	negative	negative	negative	negative	negative	negative	negative	negative	negative
ERR6005612		ERR6005612	402438	Kenya	East Africa	S. sonnei	S. sonnei	S. sonnei	S. sonnei	negative	positive	positive	negative	negative	negative	negative	negative	negative	negative	negative	negative	negative	negative	negative
ERR6004930		ERR6004930	402441	Kenya	East Africa	1b	Novel	1b	1b	negative	positive	negative	positive	negative	positive	negative	negative	negative	negative	negative	negative	negative	negative	negative
ERR6005120		ERR6005120	402573	Kenya	East Africa	6	6	6	Shigella/EIEC	negative	positive	negative	negative	negative	negative	negative	negative	negative	negative	negative	negative	negative	negative	negative
ERR6005117		ERR6005117	402709	Kenya	East Africa	3a	3a	3a	3a/5b	negative	positive	negative	negative	negative	negative	positive	positive	negative	negative	negative	negative	negative	negative	negative
ERR6005119		ERR6005119	402716	Kenya	East Africa	2b	2b	2b	2b	negative	positive	negative	negative	positive	negative	negative	positive	negative	negative	negative	negative	negative	negative	negative
ERR6005118		ERR6005118	402739	Kenya	East Africa	2a	2a	2a	2a	negative	positive	negative	negative	positive	negative	negative	negative	negative	negative	negative	negative	negative	negative	negative
ERR6005745		ERR6005745	402753	Kenya	East Africa	S. sonnei	S. sonnei	S. sonnei	S. sonnei	negative	positive	positive	negative	negative	negative	negative	negative	negative	negative	negative	negative	negative	negative	negative
ERR6005613	ERR6006233	Merged	402836	Kenya	East Africa	S. sonnei	S. sonnei	S. sonnei	S. sonnei	negative	positive	positive	negative	negative	negative	negative	negative	negative	negative	negative	negative	negative	negative	negative
ERR6005122		ERR6005122	402866	Kenya	East Africa	2b	2b	2b	2b	negative	positive	negative	negative	positive	negative	negative	positive	negative	negative	negative	negative	negative	negative	negative
ERR6005618		ERR6005618	403032	Kenya	East Africa	S. sonnei	S. sonnei	S. sonnei	S. sonnei	negative	positive	positive	negative	negative	negative	negative	negative	negative	negative	negative	negative	negative	negative	negative
ERR6005124		ERR6005124	403044	Kenya	East Africa	6	6	6	Shigella/EIEC	negative	positive	negative	negative	negative	negative	negative	negative	negative	negative	negative	negative	negative	negative	negative
ERR6005125		ERR6005125	403048	Kenya	East Africa	1b	1b	1b	1b	negative	positive	negative	positive	negative	positive	negative	negative	negative	negative	negative	negative	negative	negative	negative
ERR6005132		ERR6005132	403057	Kenya	East Africa	1b	1b	1b	1b	negative	positive	negative	positive	negative	positive	negative	negative	negative	negative	negative	negative	negative	negative	negative
ERR6005615		ERR6005615	403058	Kenya	East Africa	S. sonnei	S. sonnei	S. sonnei	S. sonnei	negative	positive	positive	negative	negative	negative	negative	negative	negative	negative	negative	negative	negative	negative	negative
ERR6005616		ERR6005616	403061	Kenya	East Africa	S. sonnei	S. sonnei	S. sonnei	S. sonnei	negative	positive	positive	negative	negative	negative	negative	negative	negative	negative	negative	negative	negative	negative	negative
ERR6005617		ERR6005617	403064	Kenya	East Africa	S. sonnei	S. sonnei	S. sonnei	S. sonnei	negative	positive	positive	negative	negative	negative	negative	negative	negative	negative	negative	negative	negative	negative	negative
ERR6005273		ERR6005273	403070	Kenya	East Africa	2b	2b	2b	2b	negative	positive	negative	negative	positive	negative	negative	positive	negative	negative	negative	negative	negative	negative	negative
ERR6005619		ERR6005619	403080	Kenya	East Africa	S. sonnei	S. sonnei	S. sonnei	S. sonnei	negative	positive	positive	negative	negative	negative	negative	negative	negative	negative	negative	negative	negative	negative	negative
ERR6005121		ERR6005121	403127	Kenya	East Africa	6	6	6	Shigella/EIEC	negative	positive	negative	negative	negative	negative	negative	negative	negative	negative	negative	negative	negative	negative	negative
ERR6005127		ERR6005127	403130	Kenya	East Africa	3a	3a	3a	3a/5b	negative	positive	negative	negative	negative	negative	positive	positive	negative	negative	negative	negative	negative	negative	negative
ERR6005130		ERR6005130	403142	Kenya	East Africa	1c(7a)	1c(7a)	1c(7a)	1a/1c(7a)	negative	positive	negative	positive	negative	negative	negative	negative	negative	negative	negative	negative	negative	negative	negative
ERR6005133		ERR6005133	403153	Kenya	East Africa	6	6	6	Shigella/EIEC	negative	positive	negative	negative	negative	negative	negative	negative	negative	negative	negative	negative	negative	negative	negative
ERR6005126		ERR6005126	403176	Kenya	East Africa	3a	3a	3a	3a/5b	negative	positive	negative	negative	negative	negative	positive	positive	negative	negative	negative	negative	negative	negative	negative
ERR6005128		ERR6005128	403184	Kenya	East Africa	3a	3a	3a	3a/5b	negative	positive	negative	negative	negative	negative	positive	positive	negative	negative	negative	negative	negative	negative	negative
ERR6005136		ERR6005136	403192	Kenya	East Africa	6	6	6	Shigella/EIEC	negative	positive	negative	negative	negative	negative	negative	negative	negative	negative	negative	negative	negative	negative	negative
ERR6005614		ERR6005614	403218	Kenya	East Africa	S. sonnei	S. sonnei	S. sonnei	S. sonnei	negative	positive	positive	negative	negative	negative	negative	negative	negative	negative	negative	negative	negative	negative	negative
ERR6005675	ERR6006235	Merged	403236	Kenya	East Africa	S. sonnei	S. sonnei	S. sonnei	S. sonnei	negative	positive	positive	negative	negative	negative	negative	negative	negative	negative	negative	negative	negative	negative	negative
ERR6005676	ERR6006237	Merged	403301	Kenya	East Africa	S. sonnei	S. sonnei	S. sonnei	S. sonnei	negative	positive	positive	negative	negative	negative	negative	negative	negative	negative	negative	negative	negative	negative	negative
ERR6005397		ERR6005397	403305	Kenya	East Africa	3a	Novel	3a	3a/5b	negative	positive	negative	negative	negative	negative	positive	positive	negative	negative	negative	negative	negative	negative	negative
ERR6005131		ERR6005131	403331	Kenya	East Africa	3a	3a	3a	3a/5b	negative	positive	negative	negative	negative	negative	positive	positive	negative	negative	negative	negative	negative	negative	negative
ERR6005268		ERR6005268	403367	Kenya	East Africa	3a	3a	3a	3a/5b	negative	positive	negative	negative	negative	negative	positive	positive	negative	negative	negative	negative	negative	negative	negative
ERR6005266		ERR6005266	403380	Kenya	East Africa	6	6	6	Shigella/EIEC	negative	positive	negative	negative	negative	negative	negative	negative	negative	negative	negative	negative	negative	negative	negative
ERR6005265	ERR6006239	Merged	403405	Kenya	East Africa	6	6	6	Shigella/EIEC	negative	positive	negative	negative	negative	negative	negative	negative	negative	negative	negative	negative	negative	negative	negative
ERR6005264		ERR6005264	403417	Kenya	East Africa	2a	2a	2a	2a	negative	positive	negative	negative	positive	negative	negative	negative	negative	negative	negative	negative	negative	negative	negative
ERR6005129		ERR6005129	403436	Kenya	East Africa	4a	4av	4av	Shigella/EIEC	negative	positive	negative	negative	negative	negative	negative	negative	negative	negative	negative	negative	negative	negative	negative
ERR6005262	ERR6006240	Merged	403477	Kenya	East Africa	6	6	6	Shigella/EIEC	negative	positive	negative	negative	negative	negative	negative	negative	negative	negative	negative	negative	negative	negative	negative
ERR6005263	ERR6006241	Merged	403488	Kenya	East Africa	3a	3a	3a	3a/5b	negative	positive	negative	negative	negative	negative	positive	positive	negative	negative	negative	negative	negative	negative	negative
ERR6005678	ERR6006243	Merged	403529	Kenya	East Africa	S. sonnei	S. sonnei	S. sonnei	S. sonnei	negative	positive	positive	negative	negative	negative	negative	negative	negative	negative	negative	negative	negative	negative	negative
ERR6005269		ERR6005269	403587	Kenya	East Africa	3a	3a	3a	3a/5b	negative	positive	negative	negative	negative	negative	positive	positive	negative	negative	negative	negative	negative	negative	negative
ERR6005384	ERR6006246	Merged	403670	Kenya	East Africa	6	No prediction	6	Shigella/EIEC	negative	positive	negative	negative	negative	negative	negative	negative	negative	negative	negative	negative	negative	negative	negative
ERR6005383	ERR6006247	Merged	403703	Kenya	East Africa	3a	3a	3a	3a/5b	negative	positive	negative	negative	negative	negative	positive	positive	negative	negative	negative	negative	negative	negative	negative
ERR6005382	ERR6006248	Merged	403723	Kenya	East Africa	6	No prediction	6	Shigella/EIEC	negative	positive	negative	negative	negative	negative	negative	negative	negative	negative	negative	negative	negative	negative	negative
ERR6005385	ERR6006249	Merged	403926	Kenya	East Africa	6	No prediction	6	Shigella/EIEC	negative	positive	negative	negative	negative	negative	negative	negative	negative	negative	negative	negative	negative	negative	negative
ERR6004616		ERR6004616	500019	India	South Asia	2a	2a	2a	2a	negative	positive	negative	negative	positive	negative	negative	negative	negative	negative	negative	negative	negative	negative	negative
ERR6004618		ERR6004618	500042	India	South Asia	2a	2a	2a	2a	negative	positive	negative	negative	positive	negative	negative	negative	negative	negative	negative	negative	negative	negative	negative
ERR6004619		ERR6004619	500062	India	South Asia	2a	2a	2a	2a	negative	positive	negative	negative	positive	negative	negative	negative	negative	negative	negative	negative	negative	negative	negative
ERR6004615		ERR6004615	500067	India	South Asia	6	6	6	Shigella/EIEC	negative	positive	negative	negative	negative	negative	negative	negative	negative	negative	negative	negative	negative	negative	negative
ERR6004620		ERR6004620	500068	India	South Asia	6	6	6	Shigella/EIEC	negative	positive	negative	negative	negative	negative	negative	negative	negative	negative	negative	negative	negative	negative	negative
ERR6004622		ERR6004622	500081	India	South Asia	3a	3a	3a	3a/5b	negative	positive	negative	negative	negative	negative	positive	positive	negative	negative	negative	negative	negative	negative	negative
ERR6005417		ERR6005417	500084	India	South Asia	S. sonnei	S. sonnei	S. sonnei	S. sonnei	negative	positive	positive	negative	negative	negative	negative	negative	negative	negative	negative	negative	negative	negative	negative
ERR6004623		ERR6004623	500201	India	South Asia	1c(7a)	1c(7a)	1c(7a)	1a/1c(7a)	negative	positive	negative	positive	negative	negative	negative	negative	negative	negative	negative	negative	negative	negative	negative
ERR6004624		ERR6004624	500229	India	South Asia	2a	2a	2a	2a	negative	positive	negative	negative	positive	negative	negative	negative	negative	negative	negative	negative	negative	negative	negative
ERR6004625		ERR6004625	500241	India	South Asia	2a	2a	2a	2a	negative	positive	negative	negative	positive	negative	negative	negative	negative	negative	negative	negative	negative	negative	negative
ERR6004626		ERR6004626	500242	India	South Asia	3a	3a	3a	3a/5b	negative	positive	negative	negative	negative	negative	positive	positive	negative	negative	negative	negative	negative	negative	negative
ERR6004621		ERR6004621	500249	India	South Asia	2a	2a	2a	2a	negative	positive	negative	negative	positive	negative	negative	negative	negative	negative	negative	negative	negative	negative	negative
ERR6004627		ERR6004627	500277	India	South Asia	4a	4av	4av	Shigella/EIEC	negative	positive	negative	negative	negative	negative	negative	negative	negative	negative	negative	negative	negative	negative	negative
ERR6005419		ERR6005419	500286	India	South Asia	S. sonnei	S. sonnei	S. sonnei	S. sonnei	negative	positive	positive	negative	negative	negative	negative	negative	negative	negative	negative	negative	negative	negative	negative
ERR6004628		ERR6004628	500290	India	South Asia	3a	3a	3a	3a/5b	negative	positive	negative	negative	negative	negative	positive	positive	negative	negative	negative	negative	negative	negative	negative
ERR6005420		ERR6005420	500292	India	South Asia	S. sonnei	S. sonnei	S. sonnei	S. sonnei	negative	positive	positive	negative	negative	negative	negative	negative	negative	negative	negative	negative	negative	negative	negative
ERR6005410		ERR6005410	500361	India	South Asia	S. sonnei	S. sonnei	S. sonnei	S. sonnei	negative	positive	positive	negative	negative	negative	negative	negative	negative	negative	negative	negative	negative	negative	negative
ERR6005421		ERR6005421	500404	India	South Asia	S. sonnei	S. sonnei	S. sonnei	S. sonnei	negative	positive	positive	negative	negative	negative	negative	negative	negative	negative	negative	negative	negative	negative	negative
ERR6004629		ERR6004629	500405	India	South Asia	2a	2a	2a	2a	negative	positive	negative	negative	positive	negative	negative	negative	negative	negative	negative	negative	negative	negative	negative
ERR6004630		ERR6004630	500410	India	South Asia	2a	2a	2a	2a	negative	positive	negative	negative	positive	negative	negative	negative	negative	negative	negative	negative	negative	negative	negative
ERR6005418		ERR6005418	500412	India	South Asia	S. sonnei	S. sonnei	S. sonnei	S. sonnei	negative	positive	positive	negative	negative	negative	negative	negative	negative	negative	negative	negative	negative	negative	negative
ERR6005516		ERR6005516	500417	India	South Asia	S. sonnei	S. sonnei	S. sonnei	S. sonnei	negative	positive	positive	negative	negative	negative	negative	negative	negative	negative	negative	negative	negative	negative	negative
ERR6004883	ERR6006251	Merged	500470	India	South Asia	2a	Novel	2a	2a	negative	positive	negative	negative	positive	negative	negative	negative	negative	negative	negative	negative	negative	negative	negative
ERR6004884	ERR6006252	Merged	500482	India	South Asia	2a	No prediction	6	2a	negative	positive	negative	negative	positive	negative	negative	negative	negative	negative	negative	negative	negative	negative	negative
ERR6004885		ERR6004885	500497	India	South Asia	2a	2a	2a	2a	negative	positive	negative	negative	positive	negative	negative	negative	negative	negative	negative	negative	negative	negative	negative
ERR6004886		ERR6004886	500580	India	South Asia	2a	2a	2a	2a	negative	positive	negative	negative	positive	negative	negative	negative	negative	negative	negative	negative	negative	negative	negative
ERR6004889		ERR6004889	500615	India	South Asia	3a	3a	3a	3a/5b	negative	positive	negative	negative	negative	negative	positive	positive	negative	negative	negative	negative	negative	negative	negative
ERR6005518		ERR6005518	500641	India	South Asia	S. sonnei	S. sonnei	S. sonnei	S. sonnei	negative	positive	positive	negative	negative	negative	negative	negative	negative	negative	negative	negative	negative	negative	negative
ERR6005519		ERR6005519	500647	India	South Asia	S. sonnei	S. sonnei	S. sonnei	S. sonnei	negative	positive	positive	negative	negative	negative	negative	negative	negative	negative	negative	negative	negative	negative	negative
ERR6005515		ERR6005515	500654	India	South Asia	S. sonnei	S. sonnei	S. sonnei	S. sonnei	negative	positive	positive	negative	negative	negative	negative	negative	negative	negative	negative	negative	negative	negative	negative
ERR6004887		ERR6004887	500678	India	South Asia	2a	2a	2a	2a	negative	positive	negative	negative	positive	negative	negative	negative	negative	negative	negative	negative	negative	negative	negative
ERR6004888		ERR6004888	500682	India	South Asia	2a	2a	2a	2a	negative	positive	negative	negative	positive	negative	negative	negative	negative	negative	negative	negative	negative	negative	negative
ERR6004890		ERR6004890	500846	India	South Asia	2a	2a	2a	2a	negative	positive	negative	negative	positive	negative	negative	negative	negative	negative	negative	negative	negative	negative	negative
ERR6005520		ERR6005520	500867	India	South Asia	S. sonnei	S. sonnei	S. sonnei	S. sonnei	negative	positive	positive	negative	negative	negative	negative	negative	negative	negative	negative	negative	negative	negative	negative
ERR6005517		ERR6005517	501002	India	South Asia	S. sonnei	S. sonnei	S. sonnei	S. sonnei	negative	positive	positive	negative	negative	negative	negative	negative	negative	negative	negative	negative	negative	negative	negative
ERR6004891		ERR6004891	501003	India	South Asia	3a	3a	3a	3a/5b	negative	positive	negative	negative	negative	negative	positive	positive	negative	negative	negative	negative	negative	negative	negative
ERR6004892		ERR6004892	503004	India	South Asia	2a	2a	2a	2a	negative	positive	negative	negative	positive	negative	negative	negative	negative	negative	negative	negative	negative	negative	negative
ERR6004893		ERR6004893	503010	India	South Asia	2a	2a	2a	2a	negative	positive	negative	negative	positive	negative	negative	negative	negative	negative	negative	negative	negative	negative	negative
ERR6005522		ERR6005522	503019	India	South Asia	S. sonnei	S. sonnei	non-Shigella/EIEC	S. sonnei	negative	positive	positive	negative	negative	negative	negative	negative	negative	negative	negative	negative	negative	negative	negative
ERR6004894		ERR6004894	503108	India	South Asia	3a	3a	3a	3a/5b	negative	positive	negative	negative	negative	negative	positive	positive	negative	negative	negative	negative	negative	negative	negative
ERR6005523		ERR6005523	503194	India	South Asia	S. sonnei	S. sonnei	S. sonnei	S. sonnei	negative	positive	positive	negative	negative	negative	negative	negative	negative	negative	negative	negative	negative	negative	negative
ERR6005591		ERR6005591	503285	India	South Asia	S. sonnei	S. sonnei	S. sonnei	S. sonnei	negative	positive	positive	negative	negative	negative	negative	negative	negative	negative	negative	negative	negative	negative	negative
ERR6005592		ERR6005592	503288	India	South Asia	S. sonnei	S. sonnei	S. sonnei	S. sonnei	negative	positive	positive	negative	negative	negative	negative	negative	negative	negative	negative	negative	negative	negative	negative
ERR6005061		ERR6005061	503414	India	South Asia	2a	2a	2a	2a	negative	positive	negative	negative	positive	negative	negative	negative	negative	negative	negative	negative	negative	negative	negative
ERR6005062		ERR6005062	503436	India	South Asia	6	6	6	Shigella/EIEC	negative	positive	negative	negative	negative	negative	negative	negative	negative	negative	negative	negative	negative	negative	negative
ERR6005066		ERR6005066	503487	India	South Asia	2a	2a	2a	2a	negative	positive	negative	negative	positive	negative	negative	negative	negative	negative	negative	negative	negative	negative	negative
ERR6005590		ERR6005590	503586	India	South Asia	S. sonnei	S. sonnei	S. sonnei	S. sonnei	negative	positive	positive	negative	negative	negative	negative	negative	negative	negative	negative	negative	negative	negative	negative
ERR6005065		ERR6005065	503608	India	South Asia	2a	2a	2a	2a	negative	positive	negative	negative	positive	negative	negative	negative	negative	negative	negative	negative	negative	negative	negative
ERR6005069		ERR6005069	503614	India	South Asia	2a	2a	2a	2a	negative	positive	negative	negative	positive	negative	negative	negative	negative	negative	negative	negative	negative	negative	negative
ERR6005594		ERR6005594	503617	India	South Asia	S. sonnei	S. sonnei	non-Shigella/EIEC	S. sonnei	negative	positive	positive	negative	negative	negative	negative	negative	negative	negative	negative	negative	negative	negative	negative
ERR6005068		ERR6005068	503640	India	South Asia	6	6	6	Shigella/EIEC	negative	positive	negative	negative	negative	negative	negative	negative	negative	negative	negative	negative	negative	negative	negative
ERR6005067		ERR6005067	503676	India	South Asia	2a	2a	2a	2a	negative	positive	negative	negative	positive	negative	negative	negative	negative	negative	negative	negative	negative	negative	negative
ERR6005596		ERR6005596	503689	India	South Asia	S. sonnei	S. sonnei	S. sonnei	S. sonnei	negative	positive	positive	negative	negative	negative	negative	negative	negative	negative	negative	negative	negative	negative	negative
ERR6005593		ERR6005593	503723	India	South Asia	S. sonnei	S. sonnei	S. sonnei	S. sonnei	negative	positive	positive	negative	negative	negative	negative	negative	negative	negative	negative	negative	negative	negative	negative
ERR6005063	ERR6006255	Merged	503771	India	South Asia	1c(7a)	1c(7a)	1c(7a)	1a/1c(7a)	negative	positive	negative	positive	negative	negative	negative	negative	negative	negative	negative	negative	negative	negative	negative
ERR6005072		ERR6005072	503816	India	South Asia	6	6	6	Shigella/EIEC	negative	positive	negative	negative	negative	negative	negative	negative	negative	negative	negative	negative	negative	negative	negative
ERR6005595		ERR6005595	503843	India	South Asia	S. sonnei	S. sonnei	non-Shigella/EIEC	S. sonnei	negative	positive	positive	negative	negative	negative	negative	negative	negative	negative	negative	negative	negative	negative	negative
ERR6005075		ERR6005075	503888	India	South Asia	3a	5b	5b	3a/5b	negative	positive	negative	negative	negative	negative	positive	positive	negative	negative	negative	negative	negative	negative	negative
ERR6005232		ERR6005232	503897	India	South Asia	2a	2a	2a	2a	negative	positive	negative	negative	positive	negative	negative	negative	negative	negative	negative	negative	negative	negative	negative
ERR6005073		ERR6005073	504008	India	South Asia	1c(7a)	1c(7a)	1c(7a)	1a/1c(7a)	negative	positive	negative	positive	negative	negative	negative	negative	negative	negative	negative	negative	negative	negative	negative
ERR6005077		ERR6005077	504032	India	South Asia	1b	1b	1b	1b	negative	positive	negative	positive	negative	positive	negative	negative	negative	negative	negative	negative	negative	negative	negative
ERR6005654		ERR6005654	504039	India	South Asia	S. sonnei	S. sonnei	non-Shigella/EIEC	S. sonnei	negative	positive	positive	negative	negative	negative	negative	negative	negative	negative	negative	negative	negative	negative	negative
ERR6005070		ERR6005070	504053	India	South Asia	2a	2a	2a	2a	negative	positive	negative	negative	positive	negative	negative	negative	negative	negative	negative	negative	negative	negative	negative
ERR6005076		ERR6005076	504056	India	South Asia	3a	3a	3a	3a/5b	negative	positive	negative	negative	negative	negative	positive	positive	negative	negative	negative	negative	negative	negative	negative
ERR6005656		ERR6005656	504086	India	South Asia	S. sonnei	S. sonnei	S. sonnei	S. sonnei	negative	positive	positive	negative	negative	negative	negative	negative	negative	negative	negative	negative	negative	negative	negative
ERR6005064		ERR6005064	504174	India	South Asia	2a	2a	2a	2a	negative	positive	negative	negative	positive	negative	negative	negative	negative	negative	negative	negative	negative	negative	negative
ERR6005071		ERR6005071	504193	India	South Asia	2a	2a	2a	2a	negative	positive	negative	negative	positive	negative	negative	negative	negative	negative	negative	negative	negative	negative	negative
ERR6005233		ERR6005233	504221	India	South Asia	3a	Novel	3a	3a/5b	negative	positive	negative	negative	negative	negative	positive	positive	negative	negative	negative	negative	negative	negative	negative
ERR6005231		ERR6005231	504261	India	South Asia	4a	4av	4av	Shigella/EIEC	negative	positive	negative	negative	negative	negative	negative	negative	negative	negative	negative	negative	negative	negative	negative
ERR6005659		ERR6005659	504267	India	South Asia	S. sonnei	S. sonnei	S. sonnei	S. sonnei	negative	positive	positive	negative	negative	negative	negative	negative	negative	negative	negative	negative	negative	negative	negative
ERR6005236		ERR6005236	504275	India	South Asia	2a	2av	2a	2a	negative	positive	negative	negative	positive	negative	negative	negative	negative	negative	negative	negative	negative	negative	negative
ERR6005657	ERR6006256	Merged	504289	India	South Asia	S. sonnei	S. sonnei	S. sonnei	S. sonnei	negative	positive	positive	negative	negative	negative	negative	negative	negative	negative	negative	negative	negative	negative	negative
ERR6005660	ERR6006257	Merged	504415	India	South Asia	S. sonnei	S. sonnei	S. sonnei	S. sonnei	negative	positive	positive	negative	negative	negative	negative	negative	negative	negative	negative	negative	negative	negative	negative
ERR6005235		ERR6005235	504435	India	South Asia	3a	Novel	3a	3a/5b	negative	positive	negative	negative	negative	negative	positive	positive	negative	negative	negative	negative	negative	negative	negative
ERR6005597		ERR6005597	504501	India	South Asia	S. sonnei	S. sonnei	S. sonnei	S. sonnei	negative	positive	positive	negative	negative	negative	negative	negative	negative	negative	negative	negative	negative	negative	negative
ERR6005074		ERR6005074	504520	India	South Asia	3a	3a	3a	3a/5b	negative	positive	negative	negative	negative	negative	positive	positive	negative	negative	negative	negative	negative	negative	negative
ERR6005237		ERR6005237	504622	India	South Asia	3a	3a	3a	3a/5b	negative	positive	negative	negative	negative	negative	positive	positive	negative	negative	negative	negative	negative	negative	negative
ERR6005661		ERR6005661	504638	India	South Asia	S. sonnei	S. sonnei	S. sonnei	S. sonnei	negative	positive	positive	negative	negative	negative	negative	negative	negative	negative	negative	negative	negative	negative	negative
ERR6005240		ERR6005240	504644	India	South Asia	4a	4av	4av	Shigella/EIEC	negative	positive	negative	negative	negative	negative	negative	negative	negative	negative	negative	negative	negative	negative	negative
ERR6005238		ERR6005238	504653	India	South Asia	3a	3a	3a	3a/5b	negative	positive	negative	negative	negative	negative	positive	positive	negative	negative	negative	negative	negative	negative	negative
ERR6005662		ERR6005662	504677	India	South Asia	S. sonnei	S. sonnei	S. sonnei	S. sonnei	negative	positive	positive	negative	negative	negative	negative	negative	negative	negative	negative	negative	negative	negative	negative
ERR6005729	ERR6006258	Merged	504686	India	South Asia	S. sonnei	S. sonnei	S. sonnei	S. sonnei	negative	positive	positive	negative	negative	negative	negative	negative	negative	negative	negative	positive	negative	negative	negative
ERR6005731		ERR6005731	504697	India	South Asia	S. sonnei	S. sonnei	S. sonnei	S. sonnei	negative	positive	positive	negative	negative	negative	negative	negative	negative	negative	negative	negative	negative	negative	negative
ERR6005734		ERR6005734	504825	India	South Asia	S. sonnei	S. sonnei	S. sonnei	S. sonnei	negative	positive	positive	negative	negative	negative	negative	negative	negative	negative	negative	positive	negative	negative	negative
ERR6005732		ERR6005732	504857	India	South Asia	S. sonnei	S. sonnei	S. sonnei	S. sonnei	negative	positive	positive	negative	negative	negative	negative	negative	negative	negative	negative	negative	negative	negative	negative
ERR6005733		ERR6005733	504892	India	South Asia	S. sonnei	S. sonnei	S. sonnei	S. sonnei	negative	positive	positive	negative	negative	negative	negative	negative	negative	negative	negative	negative	negative	negative	negative
ERR6005234		ERR6005234	504987	India	South Asia	3a	3a	3a	3a/5b	negative	positive	negative	negative	negative	negative	positive	positive	negative	negative	negative	negative	negative	negative	negative
ERR6005658	ERR6006261	Merged	505377	India	South Asia	S. sonnei	S. sonnei	S. sonnei	S. sonnei	negative	positive	positive	negative	negative	negative	negative	negative	negative	negative	negative	negative	negative	negative	negative
ERR6005730		ERR6005730	505713	India	South Asia	S. sonnei	S. sonnei	S. sonnei	S. sonnei	negative	positive	positive	negative	negative	negative	negative	negative	negative	negative	negative	negative	negative	negative	negative
ERR6005726	ERR6006262	Merged	505941	India	South Asia	S. sonnei	S. sonnei	S. sonnei	S. sonnei	negative	positive	positive	negative	negative	negative	negative	negative	negative	negative	negative	negative	negative	negative	negative
ERR6005350		ERR6005350	505942	India	South Asia	1c(7a)	1c(7a)	1c(7a)	1a/1c(7a)	negative	positive	negative	positive	negative	negative	negative	negative	negative	negative	negative	negative	negative	negative	negative
ERR6004552		ERR6004552	600002	Bangladesh	South Asia	1a	1b	1b	1b	negative	positive	negative	positive	negative	positive	negative	negative	negative	negative	negative	negative	negative	negative	negative
ERR6004554		ERR6004554	600004	Bangladesh	South Asia	2a	2a	2a	2a	negative	positive	negative	negative	positive	negative	negative	negative	negative	negative	negative	negative	negative	negative	negative
ERR6004555		ERR6004555	600006	Bangladesh	South Asia	6	6	6	Shigella/EIEC	negative	positive	negative	negative	negative	negative	negative	negative	negative	negative	negative	negative	negative	negative	negative
ERR6004556		ERR6004556	600008	Bangladesh	South Asia	6	6	6	Shigella/EIEC	negative	positive	negative	negative	negative	negative	negative	negative	negative	negative	negative	negative	negative	negative	negative
ERR6004557		ERR6004557	600018	Bangladesh	South Asia	1a	1b	1b	1b	negative	positive	negative	positive	negative	positive	negative	negative	negative	negative	negative	negative	negative	negative	negative
ERR6004558		ERR6004558	600020	Bangladesh	South Asia	2b	2b	2b	2b	negative	positive	negative	negative	positive	negative	negative	positive	negative	negative	negative	negative	negative	negative	negative
ERR6004559		ERR6004559	600023	Bangladesh	South Asia	2b	2b	2b	2b	negative	positive	negative	negative	positive	negative	negative	positive	negative	negative	negative	negative	negative	negative	negative
ERR6004560		ERR6004560	600025	Bangladesh	South Asia	2b	2b	2b	2b	negative	positive	negative	negative	positive	negative	negative	positive	negative	negative	negative	negative	negative	negative	negative
ERR6004561		ERR6004561	600026	Bangladesh	South Asia	1b	1b	1b	1b	negative	positive	negative	positive	negative	positive	negative	negative	negative	negative	negative	negative	negative	negative	negative
ERR6004553		ERR6004553	600036	Bangladesh	South Asia	2b	2b	2b	2b	negative	positive	negative	negative	positive	negative	negative	positive	negative	negative	negative	negative	negative	negative	negative
ERR6004562		ERR6004562	600040	Bangladesh	South Asia	2b	2b	2b	2b	negative	positive	negative	negative	positive	negative	negative	positive	negative	negative	negative	negative	negative	negative	negative
ERR6004564		ERR6004564	600043	Bangladesh	South Asia	4a	4av	4av	Shigella/EIEC	negative	positive	negative	negative	negative	negative	negative	negative	negative	negative	negative	negative	negative	negative	negative
ERR6005411		ERR6005411	600048	Bangladesh	South Asia	S. sonnei	S. sonnei	S. sonnei	S. sonnei	negative	positive	positive	negative	negative	negative	negative	negative	negative	negative	negative	negative	negative	negative	negative
ERR6004565		ERR6004565	600056	Bangladesh	South Asia	2a	2a	2a	2a	negative	positive	negative	negative	positive	negative	negative	negative	negative	negative	negative	negative	negative	negative	negative
ERR6004566		ERR6004566	600058	Bangladesh	South Asia	2a	2a	2a	2a	negative	positive	negative	negative	positive	negative	negative	negative	negative	negative	negative	negative	negative	negative	negative
ERR6004567		ERR6004567	600062	Bangladesh	South Asia	Y	2a	2a	2a	negative	positive	negative	negative	positive	negative	negative	negative	negative	negative	negative	negative	negative	negative	negative
ERR6004568		ERR6004568	600078	Bangladesh	South Asia	2b	2b	2b	2b	negative	positive	negative	negative	positive	negative	negative	positive	negative	negative	negative	negative	negative	negative	negative
ERR6004563		ERR6004563	600086	Bangladesh	South Asia	4a	4av	4av	Shigella/EIEC	negative	positive	negative	negative	negative	negative	negative	negative	negative	negative	negative	negative	negative	negative	negative
ERR6005412		ERR6005412	600089	Bangladesh	South Asia	S. sonnei	S. sonnei	S. sonnei	S. sonnei	negative	positive	positive	negative	negative	negative	negative	negative	negative	negative	negative	negative	negative	negative	negative
ERR6004571		ERR6004571	600106	Bangladesh	South Asia	2b	2b	2b	2b	negative	positive	negative	negative	positive	negative	negative	positive	negative	negative	negative	negative	negative	negative	negative
ERR6004572		ERR6004572	600108	Bangladesh	South Asia	1b	1b	1b	1b	negative	positive	negative	positive	negative	positive	negative	negative	negative	negative	negative	negative	negative	negative	negative
ERR6005413		ERR6005413	600111	Bangladesh	South Asia	S. sonnei	S. sonnei	S. sonnei	S. sonnei	negative	positive	positive	negative	negative	negative	negative	negative	negative	negative	negative	negative	negative	negative	negative
ERR6004573		ERR6004573	600117	Bangladesh	South Asia	2b	2b	2b	Not tested	negative	NA	NA	NA	NA	NA	NA	NA	negative	negative	negative	NA	negative	negative	NA
ERR6004574		ERR6004574	600143	Bangladesh	South Asia	2b	2b	2b	2b	negative	positive	negative	negative	positive	negative	negative	positive	negative	negative	negative	negative	negative	negative	negative
ERR6004575		ERR6004575	600144	Bangladesh	South Asia	2b	2b	2b	2b	negative	positive	negative	negative	positive	negative	negative	positive	negative	negative	negative	negative	negative	negative	negative
ERR6004576	ERR6006263	Merged	600169	Bangladesh	South Asia	6	6	6	Shigella/EIEC	negative	positive	negative	negative	negative	negative	negative	negative	negative	negative	negative	negative	negative	negative	negative
ERR6004577		ERR6004577	600174	Bangladesh	South Asia	2a	2a	2a	2a	negative	positive	negative	negative	positive	negative	negative	negative	negative	negative	negative	negative	negative	negative	negative
ERR6004570		ERR6004570	600190	Bangladesh	South Asia	1b	1b	1b	1b	negative	positive	negative	positive	negative	positive	negative	negative	negative	negative	negative	negative	negative	negative	negative
ERR6005414	ERR6006264	Merged	600202	Bangladesh	South Asia	S. sonnei	S. sonnei	S. sonnei	S. sonnei	negative	positive	positive	negative	negative	negative	negative	negative	negative	negative	negative	negative	negative	negative	negative
ERR6004579		ERR6004579	600206	Bangladesh	South Asia	2a	2a	2a	2a	negative	positive	negative	negative	positive	negative	negative	negative	negative	negative	negative	negative	negative	negative	negative
ERR6004580		ERR6004580	600213	Bangladesh	South Asia	1b	1b	1b	1b	negative	positive	negative	positive	negative	positive	negative	negative	negative	negative	negative	negative	negative	negative	negative
ERR6004581		ERR6004581	600216	Bangladesh	South Asia	3a	3a	3a	3a/5b	negative	positive	negative	negative	negative	negative	positive	positive	negative	negative	negative	negative	negative	negative	negative
ERR6004582		ERR6004582	600221	Bangladesh	South Asia	1b	1b	1b	1b	negative	positive	negative	positive	negative	positive	negative	negative	negative	negative	negative	negative	negative	negative	negative
ERR6004583		ERR6004583	600226	Bangladesh	South Asia	3a	5b	5b	3a/5b	negative	positive	negative	negative	negative	negative	positive	positive	negative	negative	negative	negative	negative	negative	negative
ERR6004584		ERR6004584	600239	Bangladesh	South Asia	1b	1b	1b	1b	negative	positive	negative	positive	negative	positive	negative	negative	negative	negative	negative	negative	negative	negative	negative
ERR6004585		ERR6004585	600241	Bangladesh	South Asia	2a	2a	2a	2a	negative	positive	negative	negative	positive	negative	negative	negative	negative	negative	negative	negative	negative	negative	negative
ERR6004586		ERR6004586	600242	Bangladesh	South Asia	5b	2b	2b	2b	negative	positive	negative	negative	positive	negative	negative	positive	negative	negative	negative	negative	negative	negative	negative
ERR6004578		ERR6004578	600247	Bangladesh	South Asia	2b	2b	2b	2b	negative	positive	negative	negative	positive	negative	negative	positive	negative	negative	negative	negative	negative	negative	negative
ERR6004587		ERR6004587	600253	Bangladesh	South Asia	2b	2b	2b	2b	negative	positive	negative	negative	positive	negative	negative	positive	negative	negative	negative	negative	negative	negative	negative
ERR6004589		ERR6004589	600255	Bangladesh	South Asia	2b	2b	2b	2b	negative	positive	negative	negative	positive	negative	negative	positive	negative	negative	negative	negative	negative	negative	negative
ERR6004590		ERR6004590	600257	Bangladesh	South Asia	2a	2b	2a	2a	negative	positive	negative	negative	positive	negative	negative	negative	negative	negative	negative	negative	negative	negative	negative
ERR6004591		ERR6004591	600267	Bangladesh	South Asia	2b	2b	2b	2b	negative	positive	negative	negative	positive	negative	negative	positive	negative	negative	negative	negative	negative	negative	negative
ERR6004592		ERR6004592	600276	Bangladesh	South Asia	2b	2b	2b	2b	negative	positive	negative	negative	positive	negative	negative	positive	negative	negative	negative	negative	negative	negative	negative
ERR6004593		ERR6004593	600281	Bangladesh	South Asia	2b	2b	2b	2b	negative	positive	negative	negative	positive	negative	negative	positive	negative	negative	negative	negative	negative	negative	negative
ERR6004594		ERR6004594	600285	Bangladesh	South Asia	2a	2a	2a	2a	negative	positive	negative	negative	positive	negative	negative	negative	negative	negative	negative	negative	negative	negative	negative
ERR6004595		ERR6004595	600296	Bangladesh	South Asia	2a	2a	2a	2a	negative	positive	negative	negative	positive	negative	negative	negative	negative	negative	negative	negative	negative	negative	negative
ERR6004588		ERR6004588	600301	Bangladesh	South Asia	2b	2b	2b	2b	negative	positive	negative	negative	positive	negative	negative	positive	negative	negative	negative	negative	negative	negative	negative
ERR6004597		ERR6004597	600305	Bangladesh	South Asia	1b	1b	1b	1b	negative	positive	negative	positive	negative	positive	negative	negative	negative	negative	negative	negative	negative	negative	negative
ERR6004599		ERR6004599	600316	Bangladesh	South Asia	5b	2b	2b	2b	negative	positive	negative	negative	positive	negative	negative	positive	negative	negative	negative	negative	negative	negative	negative
ERR6004600		ERR6004600	600320	Bangladesh	South Asia	3a	5b	5b	3a/5b	negative	positive	negative	negative	negative	negative	positive	positive	negative	negative	negative	negative	negative	negative	negative
ERR6004601		ERR6004601	600322	Bangladesh	South Asia	1b	1b	1b	1b	negative	positive	negative	positive	negative	positive	negative	negative	negative	negative	negative	negative	negative	negative	negative
ERR6004602		ERR6004602	600325	Bangladesh	South Asia	2a	2a	2a	2a	negative	positive	negative	negative	positive	negative	negative	negative	negative	negative	negative	negative	negative	negative	negative
ERR6004603		ERR6004603	600334	Bangladesh	South Asia	2b	2b	2b	2b	negative	positive	negative	negative	positive	negative	negative	positive	negative	negative	negative	negative	negative	negative	negative
ERR6004604		ERR6004604	600335	Bangladesh	South Asia	2b	2b	2b	2b	negative	positive	negative	negative	positive	negative	negative	positive	negative	negative	negative	negative	negative	negative	negative
ERR6004605		ERR6004605	600336	Bangladesh	South Asia	2b	2b	2b	2b	negative	positive	negative	negative	positive	negative	negative	positive	negative	negative	negative	negative	negative	negative	negative
ERR6004606		ERR6004606	600340	Bangladesh	South Asia	2a	2a	2a	2a	negative	positive	negative	negative	positive	negative	negative	negative	negative	negative	negative	negative	negative	negative	negative
ERR6004598		ERR6004598	600341	Bangladesh	South Asia	2a	2a	2a	2a	negative	positive	negative	negative	positive	negative	negative	negative	negative	negative	negative	negative	negative	negative	negative
ERR6004607		ERR6004607	600350	Bangladesh	South Asia	2b	2b	2b	2b	negative	positive	negative	negative	positive	negative	negative	positive	negative	negative	negative	negative	negative	negative	negative
ERR6004609		ERR6004609	600351	Bangladesh	South Asia	2b	2b	2b	2b	negative	positive	negative	negative	positive	negative	negative	positive	negative	negative	negative	negative	negative	negative	negative
ERR6004610		ERR6004610	600352	Bangladesh	South Asia	2b	2b	2b	2b	negative	positive	negative	negative	positive	negative	negative	positive	negative	negative	negative	negative	negative	negative	negative
ERR6004611		ERR6004611	600356	Bangladesh	South Asia	2b	Novel	Unknown	2b	negative	positive	negative	negative	positive	negative	negative	positive	negative	negative	negative	negative	negative	negative	negative
ERR6004612		ERR6004612	600357	Bangladesh	South Asia	2a	2a	2a	2a	negative	positive	negative	negative	positive	negative	negative	negative	negative	negative	negative	negative	negative	negative	negative
ERR6005415		ERR6005415	600358	Bangladesh	South Asia	S. sonnei	S. sonnei	S. sonnei	S. sonnei	negative	positive	positive	negative	negative	negative	negative	negative	negative	negative	negative	negative	negative	negative	negative
ERR6005416		ERR6005416	600359	Bangladesh	South Asia	S. sonnei	S. sonnei	S. sonnei	S. sonnei	negative	positive	positive	negative	negative	negative	negative	negative	negative	negative	negative	negative	negative	negative	negative
ERR6004613		ERR6004613	600364	Bangladesh	South Asia	2b	2b	2b	2b	negative	positive	negative	negative	positive	negative	negative	positive	negative	negative	negative	negative	negative	negative	negative
ERR6004614		ERR6004614	600366	Bangladesh	South Asia	2a	2a	2a	2a	negative	positive	negative	negative	positive	negative	negative	negative	negative	negative	negative	negative	negative	negative	negative
ERR6005057		ERR6005057	600369	Bangladesh	South Asia	2a	2a	2a	2a	negative	positive	negative	negative	positive	negative	negative	negative	negative	negative	negative	negative	negative	negative	negative
ERR6005058	ERR6006265	Merged	600370	Bangladesh	South Asia	2a	2a	non-Shigella/EIEC	2a	negative	positive	negative	negative	positive	negative	negative	negative	negative	negative	negative	negative	negative	negative	negative
ERR6004608		ERR6004608	600377	Bangladesh	South Asia	2b	2b	2b	2b	negative	positive	negative	negative	positive	negative	negative	positive	negative	negative	negative	negative	negative	negative	negative
ERR6004729		ERR6004729	600381	Bangladesh	South Asia	2a	2a	2a	2a	negative	positive	negative	negative	positive	negative	negative	negative	negative	negative	negative	negative	negative	negative	negative
ERR6005469		ERR6005469	600383	Bangladesh	South Asia	S. sonnei	S. sonnei	S. sonnei	S. sonnei	negative	positive	positive	negative	negative	negative	negative	negative	negative	negative	negative	negative	negative	negative	negative
ERR6004730		ERR6004730	600385	Bangladesh	South Asia	1c(7a)	1c(7a)	1c(7a)	1a/1c(7a)	negative	positive	negative	positive	negative	negative	negative	negative	negative	negative	negative	negative	negative	negative	negative
ERR6004731		ERR6004731	600388	Bangladesh	South Asia	2b	2b	2b	2b	negative	positive	negative	negative	positive	negative	negative	positive	negative	negative	negative	negative	negative	negative	negative
ERR6004732		ERR6004732	600390	Bangladesh	South Asia	1b	1b	1b	1b	negative	positive	negative	positive	negative	positive	negative	negative	negative	negative	negative	negative	negative	negative	negative
ERR6004733		ERR6004733	600392	Bangladesh	South Asia	2b	2b	2b	2b	negative	positive	negative	negative	positive	negative	negative	positive	negative	negative	negative	negative	negative	negative	negative
ERR6004734		ERR6004734	600393	Bangladesh	South Asia	2a	2a	2a	2a	negative	positive	negative	negative	positive	negative	negative	negative	negative	negative	negative	negative	negative	negative	negative
ERR6004735		ERR6004735	600403	Bangladesh	South Asia	2b	2b	2b	2b	negative	positive	negative	negative	positive	negative	negative	positive	negative	negative	negative	negative	negative	negative	negative
ERR6004736		ERR6004736	600406	Bangladesh	South Asia	6	6	6	Shigella/EIEC	negative	positive	negative	negative	negative	negative	negative	negative	negative	negative	negative	negative	negative	negative	negative
ERR6004737		ERR6004737	600409	Bangladesh	South Asia	2a	2a	2a	2a	negative	positive	negative	negative	positive	negative	negative	negative	negative	negative	negative	negative	negative	negative	negative
ERR6004738		ERR6004738	600410	Bangladesh	South Asia	2b	2b	2b	2b	negative	positive	negative	negative	positive	negative	negative	positive	negative	negative	negative	negative	negative	negative	negative
ERR6004739		ERR6004739	600413	Bangladesh	South Asia	2b	2b	2b	2b	negative	positive	negative	negative	positive	negative	negative	positive	negative	negative	negative	negative	negative	negative	negative
ERR6004740		ERR6004740	600423	Bangladesh	South Asia	2b	2b	2b	2b	negative	positive	negative	negative	positive	negative	negative	positive	negative	negative	negative	negative	negative	negative	negative
ERR6004741		ERR6004741	600427	Bangladesh	South Asia	2a	2a	2a	2a	negative	positive	negative	negative	positive	negative	negative	negative	negative	negative	negative	negative	negative	negative	negative
ERR6004742		ERR6004742	600429	Bangladesh	South Asia	2b	2b	2b	2b	negative	positive	negative	negative	positive	negative	negative	positive	negative	negative	negative	negative	negative	negative	negative
ERR6004743		ERR6004743	600430	Bangladesh	South Asia	2a	2a	2a	2a	negative	positive	negative	negative	positive	negative	negative	negative	negative	negative	negative	negative	negative	negative	negative
ERR6004744		ERR6004744	600432	Bangladesh	South Asia	3a	5b	5b	3a/5b	negative	positive	negative	negative	negative	negative	positive	positive	negative	negative	negative	negative	negative	negative	negative
ERR6004745		ERR6004745	600433	Bangladesh	South Asia	2a	2a	2a	2a	negative	positive	negative	negative	positive	negative	negative	negative	negative	negative	negative	negative	negative	negative	negative
ERR6004746		ERR6004746	600434	Bangladesh	South Asia	2b	2b	2b	2b	negative	positive	negative	negative	positive	negative	negative	positive	negative	negative	negative	negative	negative	negative	negative
ERR6004747		ERR6004747	600435	Bangladesh	South Asia	2b	2b	2b	2b	negative	positive	negative	negative	positive	negative	negative	positive	negative	negative	negative	negative	negative	negative	negative
ERR6004748		ERR6004748	600440	Bangladesh	South Asia	2b	2b	2b	2b	negative	positive	negative	negative	positive	negative	negative	positive	negative	negative	negative	negative	negative	negative	negative
ERR6004749		ERR6004749	600455	Bangladesh	South Asia	2b	2b	2b	2b	negative	positive	negative	negative	positive	negative	negative	positive	negative	negative	negative	negative	negative	negative	negative
ERR6005470		ERR6005470	600456	Bangladesh	South Asia	S. sonnei	S. sonnei	S. sonnei	S. sonnei	negative	positive	positive	negative	negative	negative	negative	negative	negative	negative	negative	negative	negative	negative	negative
ERR6004750		ERR6004750	600463	Bangladesh	South Asia	1b	1b	1b	1b	negative	positive	negative	positive	negative	positive	negative	negative	negative	negative	negative	negative	negative	negative	negative
ERR6005471	ERR6006268	Merged	600469	Bangladesh	South Asia	S. sonnei	EIEC	S. sonnei	Shigella/EIEC	negative	positive	positive	negative	positive	negative	negative	positive	negative	negative	negative	negative	negative	negative	negative
ERR6004752		ERR6004752	600471	Bangladesh	South Asia	1c(7a)	1c(7a)	1c(7a)	1a/1c(7a)	negative	positive	negative	positive	negative	negative	negative	negative	negative	negative	negative	negative	negative	negative	negative
ERR6004753		ERR6004753	600480	Bangladesh	South Asia	6	6	6	Shigella/EIEC	negative	positive	negative	negative	negative	negative	negative	negative	negative	negative	negative	negative	negative	negative	negative
ERR6004754		ERR6004754	600490	Bangladesh	South Asia	2a	2a	2a	2a	negative	positive	negative	negative	positive	negative	negative	negative	negative	negative	negative	negative	negative	negative	negative
ERR6005472		ERR6005472	600496	Bangladesh	South Asia	S. sonnei	S. sonnei	S. sonnei	S. sonnei	negative	positive	positive	negative	negative	negative	negative	negative	negative	negative	negative	negative	negative	negative	negative
ERR6004755		ERR6004755	600497	Bangladesh	South Asia	2a	2a	2a	2a	negative	positive	negative	negative	positive	negative	negative	negative	negative	negative	negative	negative	negative	negative	negative
ERR6004756		ERR6004756	600500	Bangladesh	South Asia	2a	2a	2a	2a	negative	positive	negative	negative	positive	negative	negative	negative	negative	negative	negative	negative	negative	negative	negative
ERR6004757		ERR6004757	600502	Bangladesh	South Asia	2a	2a	2a	2a	negative	positive	negative	negative	positive	negative	negative	negative	negative	negative	negative	negative	negative	negative	negative
ERR6004758		ERR6004758	600503	Bangladesh	South Asia	2a	2a	2a	2a	negative	positive	negative	negative	positive	negative	negative	negative	negative	negative	negative	negative	negative	negative	negative
ERR6004759		ERR6004759	600504	Bangladesh	South Asia	2b	2b	2b	2b	negative	positive	negative	negative	positive	negative	negative	positive	negative	negative	negative	negative	negative	negative	negative
ERR6004760		ERR6004760	600505	Bangladesh	South Asia	1b	1b	1b	1b	negative	positive	negative	positive	negative	positive	negative	negative	negative	negative	negative	negative	negative	negative	negative
ERR6005473		ERR6005473	600512	Bangladesh	South Asia	S. sonnei	S. sonnei	non-Shigella/EIEC	S. sonnei	negative	positive	positive	negative	negative	negative	negative	negative	negative	negative	negative	negative	negative	negative	negative
ERR6005400		ERR6005400	600514	Bangladesh	South Asia	Y	Yv	Yv	Shigella/EIEC	negative	positive	negative	negative	negative	negative	negative	negative	negative	negative	negative	negative	negative	negative	negative
ERR6004761		ERR6004761	600516	Bangladesh	South Asia	2b	2b	2b	2b	negative	positive	negative	negative	positive	negative	negative	positive	negative	negative	negative	negative	negative	negative	negative
ERR6004762		ERR6004762	600518	Bangladesh	South Asia	1b	1b	1b	1b	negative	positive	negative	positive	negative	positive	negative	negative	negative	negative	negative	negative	negative	negative	negative
ERR6004763		ERR6004763	600519	Bangladesh	South Asia	2a	2a	2a	2a	negative	positive	negative	negative	positive	negative	negative	negative	negative	negative	negative	negative	negative	negative	negative
ERR6004764		ERR6004764	600520	Bangladesh	South Asia	1b	1b	1b	1b	negative	positive	negative	positive	negative	positive	negative	negative	negative	negative	negative	negative	negative	negative	negative
ERR6004765		ERR6004765	600521	Bangladesh	South Asia	2a	2a	2a	2a	negative	positive	negative	negative	positive	negative	negative	negative	negative	negative	negative	negative	negative	negative	negative
ERR6004766		ERR6004766	600529	Bangladesh	South Asia	3a	5b	5b	3a/5b	negative	positive	negative	negative	negative	negative	positive	positive	negative	negative	negative	negative	negative	negative	negative
ERR6005474		ERR6005474	600532	Bangladesh	South Asia	S. sonnei	S. sonnei	S. sonnei	S. sonnei	negative	positive	positive	negative	negative	negative	negative	negative	negative	negative	negative	negative	negative	negative	negative
ERR6004768		ERR6004768	600537	Bangladesh	South Asia	3a	3a	3a	3a/5b	negative	positive	negative	negative	negative	negative	positive	positive	negative	negative	negative	negative	negative	negative	negative
ERR6004769		ERR6004769	600538	Bangladesh	South Asia	2a	2a	2a	2a	negative	positive	negative	negative	positive	negative	negative	negative	negative	negative	negative	negative	negative	negative	negative
ERR6004770		ERR6004770	600539	Bangladesh	South Asia	2b	2b	2b	2b	negative	positive	negative	negative	positive	negative	negative	positive	negative	negative	negative	negative	negative	negative	negative
ERR6004771		ERR6004771	600540	Bangladesh	South Asia	2b	2b	2b	2b	negative	positive	negative	negative	positive	negative	negative	positive	negative	negative	negative	negative	negative	negative	negative
ERR6005475		ERR6005475	600553	Bangladesh	South Asia	S. sonnei	S. sonnei	S. sonnei	S. sonnei	negative	positive	positive	negative	negative	negative	negative	negative	negative	negative	negative	negative	negative	negative	positive
ERR6004773		ERR6004773	600554	Bangladesh	South Asia	2b	2b	2b	2b	negative	positive	negative	negative	positive	negative	negative	positive	negative	negative	negative	negative	negative	negative	negative
ERR6004775		ERR6004775	600557	Bangladesh	South Asia	6	6	6	Shigella/EIEC	negative	positive	negative	negative	negative	negative	negative	negative	negative	negative	negative	negative	negative	negative	negative
ERR6004776		ERR6004776	600558	Bangladesh	South Asia	3a	5b	5b	3a/5b	negative	positive	negative	negative	negative	negative	positive	positive	negative	negative	negative	negative	negative	negative	negative
ERR6005476		ERR6005476	600559	Bangladesh	South Asia	S. sonnei	S. sonnei	S. sonnei	S. sonnei	negative	positive	positive	negative	negative	negative	negative	negative	negative	negative	negative	negative	negative	negative	negative
ERR6004777		ERR6004777	600571	Bangladesh	South Asia	3a	5b	5b	3a/5b	negative	positive	negative	negative	negative	negative	positive	positive	negative	negative	negative	negative	negative	negative	negative
ERR6004778		ERR6004778	600577	Bangladesh	South Asia	2b	2b	2b	2b	negative	positive	negative	negative	positive	negative	negative	positive	negative	negative	negative	negative	negative	negative	negative
ERR6004780		ERR6004780	600579	Bangladesh	South Asia	2a	2a	2a	2a	negative	positive	negative	negative	positive	negative	negative	negative	negative	negative	negative	negative	negative	negative	negative
ERR6005477	ERR6006270	Merged	600581	Bangladesh	South Asia	S. sonnei	S. sonnei	EIEC	S. sonnei	negative	positive	positive	negative	negative	negative	negative	negative	negative	negative	negative	negative	negative	negative	negative
ERR6004779		ERR6004779	600589	Bangladesh	South Asia	1b	1b	1b	1b	negative	positive	negative	positive	negative	positive	negative	negative	negative	negative	negative	negative	negative	negative	negative
ERR6004781	ERR6006271	Merged	600592	Bangladesh	South Asia	2a	2a	2a	2a	negative	positive	negative	negative	positive	negative	negative	negative	negative	negative	negative	negative	negative	negative	negative
ERR6005478	ERR6006272	Merged	600601	Bangladesh	South Asia	S. sonnei	S. sonnei	S. sonnei	S. sonnei	negative	positive	positive	negative	negative	negative	negative	negative	negative	negative	negative	negative	negative	negative	negative
ERR6005479		ERR6005479	600602	Bangladesh	South Asia	S. sonnei	S. sonnei	S. sonnei	S. sonnei	negative	positive	positive	negative	negative	negative	negative	negative	negative	negative	negative	negative	negative	negative	negative
ERR6005481		ERR6005481	600608	Bangladesh	South Asia	S. sonnei	S. sonnei	S. sonnei	S. sonnei	negative	positive	positive	negative	negative	negative	negative	negative	negative	negative	negative	negative	negative	negative	negative
ERR6004789		ERR6004789	600610	Bangladesh	South Asia	2a	2a	2a	2a	negative	positive	negative	negative	positive	negative	negative	negative	negative	negative	negative	negative	negative	negative	negative
ERR6004791		ERR6004791	600617	Bangladesh	South Asia	2a	2a	2a	2a	negative	positive	negative	negative	positive	negative	negative	negative	negative	negative	negative	negative	negative	negative	negative
ERR6004793		ERR6004793	600620	Bangladesh	South Asia	2b	2b	2b	2b	negative	positive	negative	negative	positive	negative	negative	positive	negative	negative	negative	negative	negative	negative	negative
ERR6004795		ERR6004795	600622	Bangladesh	South Asia	2a	2a	2a	2a	negative	positive	negative	negative	positive	negative	negative	negative	negative	negative	negative	negative	negative	negative	negative
ERR6004782		ERR6004782	600644	Bangladesh	South Asia	3a	Novel	5b	3a/5b	negative	positive	negative	negative	negative	negative	positive	positive	negative	negative	negative	negative	negative	negative	negative
ERR6004783		ERR6004783	600646	Bangladesh	South Asia	3a	5b	5b	3a/5b	negative	positive	negative	negative	negative	negative	positive	positive	negative	negative	negative	negative	negative	negative	negative
ERR6004785		ERR6004785	600649	Bangladesh	South Asia	2a	2a	2a	2a	negative	positive	negative	negative	positive	negative	negative	negative	negative	negative	negative	negative	negative	negative	negative
ERR6004787		ERR6004787	600650	Bangladesh	South Asia	2a	2a	2a	2a	negative	positive	negative	negative	positive	negative	negative	negative	negative	negative	negative	negative	negative	negative	negative
ERR6004790		ERR6004790	600652	Bangladesh	South Asia	6	6	6	Shigella/EIEC	negative	positive	negative	negative	negative	negative	negative	negative	negative	negative	negative	negative	negative	negative	negative
ERR6005483		ERR6005483	600658	Bangladesh	South Asia	S. sonnei	S. sonnei	S. sonnei	S. sonnei	negative	positive	positive	negative	negative	negative	negative	negative	negative	negative	negative	negative	negative	negative	negative
ERR6004796		ERR6004796	600662	Bangladesh	South Asia	3a	5b	5b	3a/5b	negative	positive	negative	negative	negative	negative	positive	positive	negative	negative	negative	negative	negative	negative	negative
ERR6004798		ERR6004798	600673	Bangladesh	South Asia	6	6	6	Shigella/EIEC	negative	positive	negative	negative	negative	negative	negative	negative	negative	negative	negative	negative	negative	negative	negative
ERR6004799		ERR6004799	600674	Bangladesh	South Asia	6	6	6	Shigella/EIEC	negative	positive	negative	negative	negative	negative	negative	negative	negative	negative	negative	negative	negative	negative	negative
ERR6004786		ERR6004786	600676	Bangladesh	South Asia	2b	2b	2b	2b	negative	positive	negative	negative	positive	negative	negative	positive	negative	negative	negative	negative	negative	negative	negative
ERR6004788		ERR6004788	600679	Bangladesh	South Asia	1b	1b	1b	1b	negative	positive	negative	positive	negative	positive	negative	negative	negative	negative	negative	negative	negative	negative	negative
ERR6005482		ERR6005482	600684	Bangladesh	South Asia	S. sonnei	S. sonnei	S. sonnei	S. sonnei	negative	positive	positive	negative	negative	negative	negative	negative	negative	negative	negative	negative	negative	negative	negative
ERR6004792		ERR6004792	600687	Bangladesh	South Asia	3a	3a	3a	3a/5b	negative	positive	negative	negative	negative	negative	positive	positive	negative	negative	negative	negative	negative	negative	negative
ERR6004794		ERR6004794	600689	Bangladesh	South Asia	3a	3a	3a	3a/5b	negative	positive	negative	negative	negative	negative	positive	positive	negative	negative	negative	negative	negative	negative	negative
ERR6005484		ERR6005484	600691	Bangladesh	South Asia	S. sonnei	S. sonnei	S. sonnei	S. sonnei	negative	positive	positive	negative	negative	negative	negative	negative	negative	negative	negative	negative	negative	negative	negative
ERR6005485		ERR6005485	600692	Bangladesh	South Asia	S. sonnei	S. sonnei	S. sonnei	S. sonnei	negative	positive	positive	negative	negative	negative	negative	negative	negative	negative	negative	negative	negative	negative	negative
ERR6004800		ERR6004800	600701	Bangladesh	South Asia	1b	1b	1b	1b	negative	positive	negative	positive	negative	positive	negative	negative	negative	negative	negative	negative	negative	negative	negative
ERR6004801		ERR6004801	600702	Bangladesh	South Asia	2b	2b	2b	2b	negative	positive	negative	negative	positive	negative	negative	positive	negative	negative	negative	negative	negative	negative	negative
ERR6005486		ERR6005486	600709	Bangladesh	South Asia	S. sonnei	S. sonnei	S. sonnei	S. sonnei	negative	positive	positive	negative	negative	negative	negative	negative	negative	negative	negative	negative	negative	negative	negative
ERR6005480		ERR6005480	600716	Bangladesh	South Asia	S. sonnei	S. sonnei	S. sonnei	S. sonnei	negative	positive	positive	negative	negative	negative	negative	negative	negative	negative	negative	negative	negative	negative	negative
ERR6004802		ERR6004802	600717	Bangladesh	South Asia	6	6	6	Shigella/EIEC	negative	positive	negative	negative	negative	negative	negative	negative	negative	negative	negative	negative	negative	negative	negative
ERR6005487		ERR6005487	600718	Bangladesh	South Asia	S. sonnei	S. sonnei	S. sonnei	S. sonnei	negative	positive	positive	negative	negative	negative	negative	negative	negative	negative	negative	negative	negative	negative	negative
ERR6004803	ERR6006273	Merged	600721	Bangladesh	South Asia	2b	No prediction	2b	2b	negative	positive	negative	negative	positive	negative	negative	positive	negative	negative	negative	negative	negative	negative	negative
ERR6004806		ERR6004806	600726	Bangladesh	South Asia	2a	2av	2a	2a	negative	positive	negative	negative	positive	negative	negative	negative	negative	negative	negative	negative	negative	negative	negative
ERR6004808		ERR6004808	600739	Bangladesh	South Asia	2b	2b	2b	2b	negative	positive	negative	negative	positive	negative	negative	positive	negative	negative	negative	negative	negative	negative	negative
ERR6004809		ERR6004809	600749	Bangladesh	South Asia	2a	2a	2a	2a	negative	positive	negative	negative	positive	negative	negative	negative	negative	negative	negative	negative	negative	negative	negative
ERR6005489		ERR6005489	600753	Bangladesh	South Asia	S. sonnei	S. sonnei	S. sonnei	S. sonnei	negative	positive	positive	negative	negative	negative	negative	negative	negative	negative	negative	negative	negative	negative	negative
ERR6004810		ERR6004810	600757	Bangladesh	South Asia	3a	5b	5b	3a/5b	negative	positive	negative	negative	negative	negative	positive	positive	negative	negative	negative	negative	negative	negative	positive
ERR6005490	ERR6006276	Merged	600758	Bangladesh	South Asia	S. sonnei	S. sonnei	S. sonnei	S. sonnei	negative	positive	positive	negative	negative	negative	negative	negative	negative	negative	negative	negative	negative	negative	negative
ERR6005491	ERR6006277	Merged	600761	Bangladesh	South Asia	S. sonnei	S. sonnei	S. sonnei	S. sonnei	negative	positive	positive	negative	negative	negative	negative	negative	negative	negative	negative	negative	negative	negative	negative
ERR6004812	ERR6006278	Merged	600775	Bangladesh	South Asia	2a	2av	2a	2a	negative	positive	negative	negative	positive	negative	negative	negative	negative	negative	negative	negative	negative	negative	negative
ERR6004813	ERR6006279	Merged	600776	Bangladesh	South Asia	2b	2b	non-Shigella/EIEC	2b	negative	positive	negative	negative	positive	negative	negative	positive	negative	negative	negative	negative	negative	negative	negative
ERR6004814		ERR6004814	600785	Bangladesh	South Asia	6	6	6	Shigella/EIEC	negative	positive	negative	negative	negative	negative	negative	negative	negative	negative	negative	negative	negative	negative	negative
ERR6004815	ERR6006280	Merged	600793	Bangladesh	South Asia	2b	2b	non-Shigella/EIEC	2b	negative	positive	negative	negative	positive	negative	negative	positive	negative	negative	negative	negative	negative	negative	negative
ERR6004816		ERR6004816	600794	Bangladesh	South Asia	2a	2a	2a	2a	negative	positive	negative	negative	positive	negative	negative	negative	negative	negative	negative	negative	negative	negative	negative
ERR6005492	ERR6006281	Merged	600795	Bangladesh	South Asia	S. sonnei	S. sonnei	EIEC	S. sonnei	negative	positive	positive	negative	negative	negative	negative	negative	negative	negative	negative	negative	negative	negative	negative
ERR6005493		ERR6005493	600796	Bangladesh	South Asia	S. sonnei	S. sonnei	S. sonnei	S. sonnei	negative	positive	positive	negative	negative	negative	negative	negative	negative	negative	negative	negative	negative	negative	negative
ERR6005494		ERR6005494	600808	Bangladesh	South Asia	S. sonnei	S. sonnei	S. sonnei	S. sonnei	negative	positive	positive	negative	negative	negative	negative	negative	negative	negative	negative	negative	negative	negative	negative
ERR6004817		ERR6004817	600818	Bangladesh	South Asia	2b	2b	2b	2b	negative	positive	negative	negative	positive	negative	negative	positive	negative	negative	negative	negative	negative	negative	negative
ERR6005495	ERR6006282	Merged	600824	Bangladesh	South Asia	S. sonnei	S. sonnei	S. sonnei	S. sonnei	negative	positive	positive	negative	negative	negative	negative	negative	negative	negative	negative	negative	negative	negative	negative
ERR6004818	ERR6006283	Merged	600832	Bangladesh	South Asia	6	No prediction	6	Shigella/EIEC	negative	positive	negative	negative	negative	negative	negative	negative	negative	negative	negative	negative	negative	negative	negative
ERR6005496	ERR6006284	Merged	600835	Bangladesh	South Asia	S. sonnei	S. sonnei	EIEC	S. sonnei	negative	positive	positive	negative	negative	negative	negative	negative	negative	negative	negative	negative	negative	negative	negative
ERR6005497		ERR6005497	600847	Bangladesh	South Asia	S. sonnei	S. sonnei	S. sonnei	S. sonnei	negative	positive	positive	negative	negative	negative	negative	negative	negative	negative	negative	negative	negative	negative	negative
ERR6005498	ERR6006285	Merged	600854	Bangladesh	South Asia	S. sonnei	S. sonnei	S. sonnei	S. sonnei	negative	positive	positive	negative	negative	negative	negative	negative	negative	negative	negative	negative	negative	negative	negative
ERR6005499		ERR6005499	600856	Bangladesh	South Asia	S. sonnei	S. sonnei	S. sonnei	S. sonnei	negative	positive	positive	negative	negative	negative	negative	negative	negative	negative	negative	negative	negative	negative	negative
ERR6004819	ERR6006286	Merged	600858	Bangladesh	South Asia	6	6	6	Shigella/EIEC	negative	positive	negative	negative	negative	negative	negative	negative	negative	negative	negative	negative	negative	negative	negative
ERR6005500		ERR6005500	600862	Bangladesh	South Asia	S. sonnei	S. sonnei	S. sonnei	S. sonnei	negative	positive	positive	negative	negative	negative	negative	negative	negative	negative	negative	negative	negative	negative	negative
ERR6004820	ERR6006287	Merged	600866	Bangladesh	South Asia	2b	EIEC	non-Shigella/EIEC	2b	negative	positive	negative	negative	positive	negative	negative	positive	negative	negative	negative	negative	negative	negative	negative
ERR6005501	ERR6006288	Merged	600868	Bangladesh	South Asia	S. sonnei	S. sonnei	EIEC	S. sonnei	negative	positive	positive	negative	negative	negative	negative	negative	negative	negative	negative	negative	negative	negative	negative
ERR6005502		ERR6005502	600876	Bangladesh	South Asia	S. sonnei	S. sonnei	S. sonnei	S. sonnei	negative	positive	positive	negative	negative	negative	negative	negative	negative	negative	negative	negative	negative	negative	negative
ERR6005503	ERR6006289	Merged	600879	Bangladesh	South Asia	S. sonnei	EIEC	S. sonnei	Shigella/EIEC	negative	positive	positive	negative	positive	negative	negative	positive	negative	negative	negative	negative	negative	negative	negative
ERR6004821		ERR6004821	600891	Bangladesh	South Asia	2a	2a	2a	2a	negative	positive	negative	negative	positive	negative	negative	negative	negative	negative	negative	negative	negative	negative	negative
ERR6005504		ERR6005504	600896	Bangladesh	South Asia	S. sonnei	S. sonnei	S. sonnei	S. sonnei	negative	positive	positive	negative	negative	negative	negative	negative	negative	negative	negative	negative	negative	negative	negative
ERR6004822	ERR6006290	Merged	600906	Bangladesh	South Asia	1b	1b	1b	1b	negative	positive	negative	positive	negative	positive	negative	negative	negative	negative	negative	negative	negative	negative	negative
ERR6004823		ERR6004823	600911	Bangladesh	South Asia	4a	4av	4av	Shigella/EIEC	negative	positive	negative	negative	negative	negative	negative	negative	negative	negative	negative	negative	negative	negative	negative
ERR6004824		ERR6004824	600919	Bangladesh	South Asia	2b	2b	2b	2b	negative	positive	negative	negative	positive	negative	negative	positive	negative	negative	negative	negative	negative	negative	negative
ERR6005505	ERR6006291	Merged	600923	Bangladesh	South Asia	S. sonnei	S. sonnei	S. sonnei	S. sonnei	negative	positive	positive	negative	negative	negative	negative	negative	negative	negative	negative	negative	negative	negative	negative
ERR6004825		ERR6004825	600939	Bangladesh	South Asia	6	6	6	Shigella/EIEC	negative	positive	negative	negative	negative	negative	negative	negative	negative	negative	negative	negative	negative	negative	negative
ERR6004826	ERR6006292	Merged	600941	Bangladesh	South Asia	1b	1b	1b	1b	negative	positive	negative	positive	negative	positive	negative	negative	negative	negative	negative	negative	negative	negative	negative
ERR6004827		ERR6004827	600945	Bangladesh	South Asia	2b	2b	2b	2b	negative	positive	negative	negative	positive	negative	negative	positive	negative	negative	negative	negative	negative	negative	negative
ERR6004828		ERR6004828	600958	Bangladesh	South Asia	2b	2b	2b	2b	negative	positive	negative	negative	positive	negative	negative	positive	negative	negative	negative	negative	negative	negative	negative
ERR6004829		ERR6004829	600960	Bangladesh	South Asia	2b	2b	2b	2b	negative	positive	negative	negative	positive	negative	negative	positive	negative	negative	negative	negative	negative	negative	negative
ERR6004830		ERR6004830	600982	Bangladesh	South Asia	1b	1b	1b	1b	negative	positive	negative	positive	negative	positive	negative	negative	negative	negative	negative	negative	negative	negative	negative
ERR6004831		ERR6004831	600987	Bangladesh	South Asia	2a	2a	2a	2a	negative	positive	negative	negative	positive	negative	negative	negative	negative	negative	negative	negative	negative	negative	negative
ERR6004832	ERR6006293	Merged	600988	Bangladesh	South Asia	2b	Novel	non-Shigella/EIEC	2b	negative	positive	negative	negative	positive	negative	negative	positive	negative	negative	negative	negative	negative	negative	negative
ERR6004833	ERR6006294	Merged	600996	Bangladesh	South Asia	6	No prediction	6	Shigella/EIEC	negative	positive	negative	negative	negative	negative	negative	negative	negative	negative	negative	negative	negative	negative	negative
ERR6004834		ERR6004834	601012	Bangladesh	South Asia	2b	2b	2b	2b	negative	positive	negative	negative	positive	negative	negative	positive	negative	negative	negative	negative	negative	negative	negative
ERR6004835		ERR6004835	601016	Bangladesh	South Asia	1c(7a)	1c(7a)	1c(7a)	1a/1c(7a)	negative	positive	negative	positive	negative	negative	negative	negative	negative	negative	negative	negative	negative	negative	negative
ERR6004836	ERR6006296	Merged	601022	Bangladesh	South Asia	2b	Novel	non-Shigella/EIEC	2b	negative	positive	negative	negative	positive	negative	negative	positive	negative	negative	negative	negative	negative	negative	negative
ERR6004837		ERR6004837	601027	Bangladesh	South Asia	2b	2b	2b	2b	negative	positive	negative	negative	positive	negative	negative	positive	negative	negative	negative	negative	negative	negative	negative
ERR6004838	ERR6006297	Merged	601030	Bangladesh	South Asia	1b	1b	1b	1b	negative	positive	negative	positive	negative	positive	negative	negative	negative	negative	negative	negative	negative	negative	negative
ERR6004839		ERR6004839	601036	Bangladesh	South Asia	3a	5b	5b	3a/5b	negative	positive	negative	negative	negative	negative	positive	positive	negative	negative	negative	negative	negative	negative	negative
ERR6005506	ERR6006298	Merged	601042	Bangladesh	South Asia	S. sonnei	S. sonnei	S. sonnei	S. sonnei	negative	positive	positive	negative	negative	negative	negative	negative	negative	negative	negative	negative	negative	negative	negative
ERR6004840		ERR6004840	601046	Bangladesh	South Asia	2a	2a	2a	2a	negative	positive	negative	negative	positive	negative	negative	negative	negative	negative	negative	negative	negative	negative	negative
ERR6004841		ERR6004841	601057	Bangladesh	South Asia	4a	4av	4av	Shigella/EIEC	negative	positive	negative	negative	negative	negative	negative	negative	negative	negative	negative	negative	negative	negative	negative
ERR6004843		ERR6004843	601060	Bangladesh	South Asia	4a	4av	4av	Shigella/EIEC	negative	positive	negative	negative	negative	negative	negative	negative	negative	negative	negative	negative	negative	negative	negative
ERR6004844	ERR6006300	Merged	601076	Bangladesh	South Asia	2a	Novel	2a	Shigella/EIEC	negative	positive	negative	negative	positive	negative	positive	positive	negative	negative	negative	negative	negative	negative	negative
ERR6004845		ERR6004845	601078	Bangladesh	South Asia	6	6	6	Shigella/EIEC	negative	positive	negative	negative	negative	negative	negative	negative	negative	negative	negative	negative	negative	negative	negative
ERR6004846		ERR6004846	601087	Bangladesh	South Asia	3a	5b	5b	3a/5b	negative	positive	negative	negative	negative	negative	positive	positive	negative	negative	negative	negative	negative	negative	negative
ERR6004847	ERR6006302	Merged	601091	Bangladesh	South Asia	3a	Novel	5b	3a/5b	negative	positive	negative	negative	negative	negative	positive	positive	negative	negative	negative	negative	negative	negative	negative
ERR6004848	ERR6006303	Merged	601111	Bangladesh	South Asia	2a	2a	2a	2a	negative	positive	negative	negative	positive	negative	negative	negative	negative	negative	negative	negative	negative	negative	negative
ERR6004849		ERR6004849	601132	Bangladesh	South Asia	2a	2a	2a	2a	negative	positive	negative	negative	positive	negative	negative	negative	negative	negative	negative	negative	negative	negative	negative
ERR6005507		ERR6005507	601133	Bangladesh	South Asia	S. sonnei	S. sonnei	S. sonnei	S. sonnei	negative	positive	positive	negative	negative	negative	negative	negative	negative	negative	negative	negative	negative	negative	negative
ERR6005508		ERR6005508	601138	Bangladesh	South Asia	S. sonnei	S. sonnei	S. sonnei	S. sonnei	negative	positive	positive	negative	negative	negative	negative	negative	negative	negative	negative	negative	negative	negative	negative
ERR6004850		ERR6004850	601142	Bangladesh	South Asia	3a	5b	5b	3a/5b	negative	positive	negative	negative	negative	negative	positive	positive	negative	negative	negative	negative	negative	negative	negative
ERR6004851	ERR6006305	Merged	601151	Bangladesh	South Asia	2b	2b	2b	2b	negative	positive	negative	negative	positive	negative	negative	positive	negative	negative	negative	negative	negative	negative	negative
ERR6004852	ERR6006306	Merged	601156	Bangladesh	South Asia	3a	5b	5b	3a/5b	negative	positive	negative	negative	negative	negative	positive	positive	negative	negative	negative	negative	negative	negative	negative
ERR6004853	ERR6006307	Merged	601160	Bangladesh	South Asia	3a	5b	5b	3a/5b	negative	positive	negative	negative	negative	negative	positive	positive	negative	negative	negative	negative	negative	negative	negative
ERR6004854		ERR6004854	601161	Bangladesh	South Asia	1b	Novel	1b	1b	negative	positive	negative	positive	negative	positive	negative	negative	negative	negative	negative	negative	negative	negative	negative
ERR6004855		ERR6004855	601166	Bangladesh	South Asia	2a	2a	2a	2a	negative	positive	negative	negative	positive	negative	negative	negative	negative	negative	negative	negative	negative	negative	negative
ERR6004856	ERR6006308	Merged	601176	Bangladesh	South Asia	2b	2b	2b	2b	negative	positive	negative	negative	positive	negative	negative	positive	negative	negative	negative	negative	negative	negative	negative
ERR6005509	ERR6006309	Merged	601185	Bangladesh	South Asia	S. sonnei	S. sonnei	S. sonnei	S. sonnei	negative	positive	positive	negative	negative	negative	negative	negative	negative	negative	negative	negative	negative	negative	negative
ERR6004857		ERR6004857	601187	Bangladesh	South Asia	3a	3a	3a	3a/5b	negative	positive	negative	negative	negative	negative	positive	positive	negative	negative	negative	negative	negative	negative	negative
ERR6004858		ERR6004858	601208	Bangladesh	South Asia	6	6	6	Shigella/EIEC	negative	positive	negative	negative	negative	negative	negative	negative	negative	negative	negative	negative	negative	negative	negative
ERR6004859		ERR6004859	601226	Bangladesh	South Asia	2a	2a	2a	2a	negative	positive	negative	negative	positive	negative	negative	negative	negative	negative	negative	negative	negative	negative	negative
ERR6004860	ERR6006310	Merged	601230	Bangladesh	South Asia	2b	Novel	2b	Shigella/EIEC	negative	positive	negative	negative	positive	positive	negative	positive	negative	negative	negative	negative	negative	negative	negative
ERR6005401		ERR6005401	601238	Bangladesh	South Asia	5b	2b	2b	2b	negative	positive	negative	negative	positive	negative	negative	positive	negative	negative	negative	negative	negative	negative	negative
ERR6004861	ERR6006311	Merged	601250	Bangladesh	South Asia	2a	2a	2a	2a	negative	positive	negative	negative	positive	negative	negative	negative	negative	negative	negative	negative	negative	negative	negative
ERR6004862		ERR6004862	601257	Bangladesh	South Asia	2a	2a	2a	2a	negative	positive	negative	negative	positive	negative	negative	negative	negative	negative	negative	negative	negative	negative	negative
ERR6004863		ERR6004863	601267	Bangladesh	South Asia	3a	5b	5b	3a/5b	negative	positive	negative	negative	negative	negative	positive	positive	negative	negative	negative	negative	negative	negative	negative
ERR6004864		ERR6004864	601269	Bangladesh	South Asia	2a	2a	2a	2a	negative	positive	negative	negative	positive	negative	negative	negative	negative	negative	negative	negative	negative	negative	negative
ERR6004865		ERR6004865	601279	Bangladesh	South Asia	4a	4av	4av	Shigella/EIEC	negative	positive	negative	negative	negative	negative	negative	negative	negative	negative	negative	negative	negative	negative	negative
ERR6004715		ERR6004715	601296	Bangladesh	South Asia	4a	4av	4av	Shigella/EIEC	negative	positive	negative	negative	negative	negative	negative	negative	negative	negative	negative	negative	negative	negative	negative
ERR6004716		ERR6004716	601297	Bangladesh	South Asia	2b	2b	2b	2b	negative	positive	negative	negative	positive	negative	negative	positive	negative	negative	negative	negative	negative	negative	negative
ERR6004718		ERR6004718	602014	Bangladesh	South Asia	1b	1b	1b	1b	negative	positive	negative	positive	negative	positive	negative	negative	negative	negative	negative	negative	negative	negative	negative
ERR6004719		ERR6004719	602017	Bangladesh	South Asia	2a	2a	2a	2a	negative	positive	negative	negative	positive	negative	negative	negative	negative	negative	negative	negative	negative	negative	negative
ERR6004720		ERR6004720	602028	Bangladesh	South Asia	2a	2a	2a	2a	negative	positive	negative	negative	positive	negative	negative	negative	negative	negative	negative	negative	negative	negative	negative
ERR6004721		ERR6004721	602035	Bangladesh	South Asia	6	6	6	Shigella/EIEC	negative	positive	negative	negative	negative	negative	negative	negative	negative	negative	negative	negative	negative	negative	negative
ERR6005462		ERR6005462	602042	Bangladesh	South Asia	S. sonnei	S. sonnei	S. sonnei	S. sonnei	negative	positive	positive	negative	negative	negative	negative	negative	negative	negative	negative	negative	negative	negative	negative
ERR6004723		ERR6004723	602054	Bangladesh	South Asia	2a	2a	2a	2a	negative	positive	negative	negative	positive	negative	negative	negative	negative	negative	negative	negative	negative	negative	negative
ERR6004724	ERR6006315	Merged	602062	Bangladesh	South Asia	2a	EIEC	2a	2a	negative	positive	negative	negative	positive	negative	negative	negative	negative	negative	negative	negative	negative	negative	negative
ERR6004725	ERR6006316	Merged	602063	Bangladesh	South Asia	3a	No prediction	5b	3a/5b	negative	positive	negative	negative	negative	negative	positive	positive	negative	negative	negative	negative	negative	negative	negative
ERR6005465	ERR6006320	Merged	602078	Bangladesh	South Asia	S. sonnei	S. sonnei	S. sonnei	S. sonnei	negative	positive	positive	negative	negative	negative	negative	negative	negative	negative	negative	negative	negative	negative	negative
ERR6004727	ERR6006321	Merged	602119	Bangladesh	South Asia	2a	2av	2a	2a	negative	positive	negative	negative	positive	negative	negative	negative	negative	negative	negative	negative	negative	negative	negative
ERR6005466	ERR6006322	Merged	602131	Bangladesh	South Asia	S. sonnei	No prediction	S. sonnei	Shigella/EIEC	negative	positive	positive	positive	negative	negative	negative	negative	negative	negative	negative	positive	negative	negative	negative
ERR6005467		ERR6005467	602139	Bangladesh	South Asia	S. sonnei	S. sonnei	S. sonnei	S. sonnei	negative	positive	positive	negative	negative	negative	negative	negative	negative	negative	negative	negative	negative	negative	negative
ERR6004728		ERR6004728	602141	Bangladesh	South Asia	3a	5b	5b	3a/5b	negative	positive	negative	negative	negative	negative	positive	positive	negative	negative	negative	negative	negative	negative	negative
ERR6005468		ERR6005468	602157	Bangladesh	South Asia	S. sonnei	S. sonnei	S. sonnei	S. sonnei	negative	positive	positive	negative	negative	negative	negative	negative	negative	negative	negative	negative	negative	negative	negative
ERR6004940		ERR6004940	602174	Bangladesh	South Asia	6	6	6	Shigella/EIEC	negative	positive	negative	negative	negative	negative	negative	negative	negative	negative	negative	negative	negative	negative	negative
ERR6004941		ERR6004941	602184	Bangladesh	South Asia	2a	2a	2a	2a	negative	positive	negative	negative	positive	negative	negative	negative	negative	negative	negative	negative	negative	negative	negative
ERR6004942		ERR6004942	602191	Bangladesh	South Asia	3a	3a	3a	3a/5b	negative	positive	negative	negative	negative	negative	positive	positive	negative	negative	negative	negative	negative	negative	negative
ERR6004943		ERR6004943	602205	Bangladesh	South Asia	2a	2a	2a	2a	negative	positive	negative	negative	positive	negative	negative	negative	negative	negative	negative	negative	negative	negative	positive
ERR6004944		ERR6004944	602218	Bangladesh	South Asia	2b	2b	2b	2b	negative	positive	negative	negative	positive	negative	negative	positive	negative	negative	negative	negative	negative	negative	negative
ERR6004938	ERR6006323	Merged	602219	Mozambique	East Africa	2a	2a	2a	2a	negative	positive	negative	negative	positive	negative	negative	negative	negative	negative	negative	negative	negative	negative	negative
ERR6004946		ERR6004946	602220	Bangladesh	South Asia	4a	4av	4av	Shigella/EIEC	negative	positive	negative	negative	negative	negative	negative	negative	negative	negative	negative	negative	negative	negative	negative
ERR6004947		ERR6004947	602221	Bangladesh	South Asia	4a	4av	4av	Shigella/EIEC	negative	positive	negative	negative	negative	negative	negative	negative	negative	negative	negative	negative	negative	negative	negative
ERR6004948	ERR6006324	Merged	602223	Bangladesh	South Asia	4a	No prediction	4av	Shigella/EIEC	negative	positive	negative	negative	negative	negative	negative	negative	negative	negative	negative	negative	negative	negative	negative
ERR6004949		ERR6004949	602248	Bangladesh	South Asia	2b	2b	2b	2b	negative	positive	negative	negative	positive	negative	negative	positive	negative	negative	negative	negative	negative	negative	negative
ERR6004950		ERR6004950	602262	Bangladesh	South Asia	2b	2b	2b	2b	negative	positive	negative	negative	positive	negative	negative	positive	negative	negative	negative	negative	negative	negative	negative
ERR6004951		ERR6004951	602280	Bangladesh	South Asia	2a	2a	2a	2a	negative	positive	negative	negative	positive	negative	negative	negative	negative	negative	negative	negative	negative	negative	negative
ERR6004945		ERR6004945	602281	Bangladesh	South Asia	2b	2b	2b	2b	negative	positive	negative	negative	positive	negative	negative	positive	negative	negative	negative	negative	negative	negative	negative
ERR6004953		ERR6004953	602282	Bangladesh	South Asia	2b	2b	2b	2b	negative	positive	negative	negative	positive	negative	negative	positive	negative	negative	negative	negative	negative	negative	negative
ERR6004954		ERR6004954	602293	Bangladesh	South Asia	1c(7a)	1c(7a)	1c(7a)	1a/1c(7a)	negative	positive	negative	positive	negative	negative	negative	negative	negative	negative	negative	negative	negative	negative	negative
ERR6004955		ERR6004955	602295	Bangladesh	South Asia	2a	2a	2a	2a	negative	positive	negative	negative	positive	negative	negative	negative	negative	negative	negative	negative	negative	negative	negative
ERR6004956		ERR6004956	602296	Bangladesh	South Asia	2a	2a	2a	2a	negative	positive	negative	negative	positive	negative	negative	negative	negative	negative	negative	negative	negative	negative	negative
ERR6005540		ERR6005540	602297	Bangladesh	South Asia	S. sonnei	S. sonnei	S. sonnei	S. sonnei	negative	positive	positive	negative	negative	negative	negative	negative	negative	negative	negative	negative	negative	negative	negative
ERR6004957		ERR6004957	602303	Bangladesh	South Asia	2a	2a	2a	2a	negative	positive	negative	negative	positive	negative	negative	negative	negative	negative	negative	negative	negative	negative	negative
ERR6004952		ERR6004952	602312	Bangladesh	South Asia	2b	2b	2b	2b	negative	positive	negative	negative	positive	negative	negative	positive	negative	negative	negative	negative	negative	negative	negative
ERR6004958		ERR6004958	602327	Bangladesh	South Asia	2a	2a	2a	2a	negative	positive	negative	negative	positive	negative	negative	negative	negative	negative	negative	negative	negative	negative	negative
ERR6004960		ERR6004960	602336	Bangladesh	South Asia	3a	5b	5b	3a/5b	negative	positive	negative	negative	negative	negative	positive	positive	negative	negative	negative	negative	negative	negative	negative
ERR6004962		ERR6004962	602342	Bangladesh	South Asia	1c(7a)	1c(7a)	1c(7a)	1a/1c(7a)	negative	positive	negative	positive	negative	negative	negative	negative	negative	negative	negative	negative	negative	negative	negative
ERR6004963	ERR6006325	Merged	602347	Bangladesh	South Asia	2b	2b	2b	2b	negative	positive	negative	negative	positive	negative	negative	positive	negative	negative	negative	negative	negative	negative	negative
ERR6004964		ERR6004964	602354	Bangladesh	South Asia	2a	2a	2a	2a	negative	positive	negative	negative	positive	negative	negative	negative	negative	negative	negative	negative	negative	negative	negative
ERR6004965		ERR6004965	602361	Bangladesh	South Asia	2b	2b	2b	2b	negative	positive	negative	negative	positive	negative	negative	positive	negative	negative	negative	negative	negative	negative	negative
ERR6004959		ERR6004959	602367	Bangladesh	South Asia	3a	5b	5b	3a/5b	negative	positive	negative	negative	negative	negative	positive	positive	negative	negative	negative	negative	negative	negative	negative
ERR6004966	ERR6006326	Merged	602377	Bangladesh	South Asia	6	No prediction	6	Shigella/EIEC	negative	positive	negative	negative	negative	negative	negative	negative	negative	negative	negative	negative	negative	negative	negative
ERR6004967		ERR6004967	602378	Bangladesh	South Asia	1c(7a)	1c(7a)	1c(7a)	1a/1c(7a)	negative	positive	negative	positive	negative	negative	negative	negative	negative	negative	negative	negative	negative	negative	negative
ERR6004968		ERR6004968	602379	Bangladesh	South Asia	2b	2b	2b	2b	negative	positive	negative	negative	positive	negative	negative	positive	negative	negative	negative	negative	negative	negative	negative
ERR6005541		ERR6005541	602380	Bangladesh	South Asia	S. sonnei	S. sonnei	S. sonnei	S. sonnei	negative	positive	positive	negative	negative	negative	negative	negative	negative	negative	negative	negative	negative	negative	negative
ERR6004969		ERR6004969	602383	Bangladesh	South Asia	2a	2a	2a	2a	negative	positive	negative	negative	positive	negative	negative	negative	negative	negative	negative	negative	negative	negative	negative
ERR6004970		ERR6004970	602390	Bangladesh	South Asia	6	6	6	Shigella/EIEC	negative	positive	negative	negative	negative	negative	negative	negative	negative	negative	negative	negative	negative	negative	negative
ERR6004971		ERR6004971	602397	Bangladesh	South Asia	2b	2b	2b	2b	negative	positive	negative	negative	positive	negative	negative	positive	negative	negative	negative	negative	negative	negative	negative
ERR6005542		ERR6005542	602399	Bangladesh	South Asia	S. sonnei	S. sonnei	S. sonnei	S. sonnei	negative	positive	positive	negative	negative	negative	negative	negative	negative	negative	negative	negative	negative	negative	negative
ERR6004973		ERR6004973	602418	Bangladesh	South Asia	2a	2a	2a	2a	negative	positive	negative	negative	positive	negative	negative	negative	negative	negative	negative	negative	negative	negative	negative
ERR6005543		ERR6005543	602427	Bangladesh	South Asia	S. sonnei	S. sonnei	S. sonnei	S. sonnei	negative	positive	positive	negative	negative	negative	negative	negative	negative	negative	negative	negative	negative	negative	negative
ERR6005544		ERR6005544	602430	Bangladesh	South Asia	S. sonnei	S. sonnei	S. sonnei	S. sonnei	negative	positive	positive	negative	negative	negative	negative	negative	negative	negative	negative	negative	negative	negative	negative
ERR6005545		ERR6005545	602431	Bangladesh	South Asia	S. sonnei	S. sonnei	S. sonnei	S. sonnei	negative	positive	positive	negative	negative	negative	negative	negative	negative	negative	negative	negative	negative	negative	negative
ERR6004972		ERR6004972	602434	Bangladesh	South Asia	6	6	6	Shigella/EIEC	negative	positive	negative	negative	negative	negative	negative	negative	negative	negative	negative	negative	negative	negative	negative
ERR6005546		ERR6005546	602438	Bangladesh	South Asia	S. sonnei	S. sonnei	S. sonnei	S. sonnei	negative	positive	positive	negative	negative	negative	negative	negative	negative	negative	negative	negative	negative	negative	negative
ERR6004976		ERR6004976	602442	Bangladesh	South Asia	2b	2b	2b	2b	negative	positive	negative	negative	positive	negative	negative	positive	negative	negative	negative	negative	negative	negative	negative
ERR6004977		ERR6004977	602454	Bangladesh	South Asia	2b	2b	2b	2b	negative	positive	negative	negative	positive	negative	negative	positive	negative	negative	negative	negative	negative	negative	negative
ERR6004978		ERR6004978	602458	Bangladesh	South Asia	2a	2a	2a	2a	negative	positive	negative	negative	positive	negative	negative	negative	negative	negative	negative	negative	negative	negative	negative
ERR6005547		ERR6005547	602483	Bangladesh	South Asia	S. sonnei	S. sonnei	S. sonnei	S. sonnei	negative	positive	positive	negative	negative	negative	negative	negative	negative	negative	negative	negative	negative	negative	negative
ERR6005548		ERR6005548	602487	Bangladesh	South Asia	S. sonnei	S. sonnei	S. sonnei	S. sonnei	negative	positive	positive	negative	negative	negative	negative	negative	negative	negative	negative	negative	negative	negative	negative
ERR6004980		ERR6004980	602491	Bangladesh	South Asia	2a	2a	2a	2a	negative	positive	negative	negative	positive	negative	negative	negative	negative	negative	negative	negative	negative	negative	negative
ERR6004975		ERR6004975	602509	Bangladesh	South Asia	2a	2a	2a	2a	negative	positive	negative	negative	positive	negative	negative	negative	negative	negative	negative	negative	negative	negative	negative
ERR6004981		ERR6004981	602521	Bangladesh	South Asia	1b	1b	1b	1b	negative	positive	negative	positive	negative	positive	negative	negative	negative	negative	negative	negative	negative	negative	negative
ERR6004983		ERR6004983	602528	Bangladesh	South Asia	1c(7a)	1c(7a)	1c(7a)	1a/1c(7a)	negative	positive	negative	positive	negative	negative	negative	negative	negative	negative	negative	negative	negative	negative	negative
ERR6004988		ERR6004988	602542	Bangladesh	South Asia	2a	2a	2a	2a	negative	positive	negative	negative	positive	negative	negative	negative	negative	negative	negative	negative	negative	negative	negative
ERR6004989		ERR6004989	602560	Bangladesh	South Asia	3a	5b	5b	3a/5b	negative	positive	negative	negative	negative	negative	positive	positive	negative	negative	negative	negative	negative	negative	negative
ERR6004990		ERR6004990	602562	Bangladesh	South Asia	2a	2a	2a	2a	negative	positive	negative	negative	positive	negative	negative	negative	negative	negative	negative	negative	negative	negative	negative
ERR6005549		ERR6005549	602572	Bangladesh	South Asia	S. sonnei	S. sonnei	S. sonnei	S. sonnei	negative	positive	positive	negative	negative	negative	negative	negative	negative	negative	negative	negative	negative	negative	negative
ERR6004992		ERR6004992	602596	Bangladesh	South Asia	3a	5b	5b	3a/5b	negative	positive	negative	negative	negative	negative	positive	positive	negative	negative	negative	negative	negative	negative	negative
ERR6004993		ERR6004993	602597	Bangladesh	South Asia	2a	2a	2a	2a	negative	positive	negative	negative	positive	negative	negative	negative	negative	negative	negative	negative	negative	negative	negative
ERR6004994		ERR6004994	602601	Bangladesh	South Asia	2b	2b	2b	2b	negative	positive	negative	negative	positive	negative	negative	positive	negative	negative	negative	negative	negative	negative	negative
ERR6005550		ERR6005550	602602	Bangladesh	South Asia	S. sonnei	S. sonnei	S. sonnei	S. sonnei	negative	positive	positive	negative	negative	negative	negative	negative	negative	negative	negative	negative	negative	negative	negative
ERR6004995		ERR6004995	602606	Bangladesh	South Asia	2a	No prediction	2a	2a	negative	positive	negative	negative	positive	negative	negative	negative	negative	negative	negative	negative	negative	negative	negative
ERR6004991		ERR6004991	602614	Bangladesh	South Asia	2a	2a	2a	2a	negative	positive	negative	negative	positive	negative	negative	negative	negative	negative	negative	negative	negative	negative	negative
ERR6004996		ERR6004996	602626	Bangladesh	South Asia	2a	2a	2a	2a	negative	positive	negative	negative	positive	negative	negative	negative	negative	negative	negative	negative	negative	negative	negative
ERR6004998		ERR6004998	602644	Bangladesh	South Asia	3a	5b	5b	3a/5b	negative	positive	negative	negative	negative	negative	positive	positive	negative	negative	negative	negative	negative	negative	negative
ERR6005551		ERR6005551	602658	Bangladesh	South Asia	S. sonnei	S. sonnei	S. sonnei	S. sonnei	negative	positive	positive	negative	negative	negative	negative	negative	negative	negative	negative	negative	negative	negative	negative
ERR6004999		ERR6004999	602660	Bangladesh	South Asia	6	6	6	Shigella/EIEC	negative	positive	negative	negative	negative	negative	negative	negative	negative	negative	negative	negative	negative	negative	negative
ERR6005000		ERR6005000	602684	Bangladesh	South Asia	6	6	6	Shigella/EIEC	negative	positive	negative	negative	negative	negative	negative	negative	negative	negative	negative	negative	negative	negative	negative
ERR6005001		ERR6005001	602685	Bangladesh	South Asia	1b	1b	1b	1b	negative	positive	negative	positive	negative	positive	negative	negative	negative	negative	negative	negative	negative	negative	negative
ERR6005002		ERR6005002	602686	Bangladesh	South Asia	2b	2b	2b	2b	negative	positive	negative	negative	positive	negative	negative	positive	negative	negative	negative	negative	negative	negative	negative
ERR6004997		ERR6004997	602687	Bangladesh	South Asia	6	6	6	Shigella/EIEC	negative	positive	negative	negative	negative	negative	negative	negative	negative	negative	negative	negative	negative	negative	positive
ERR6005003		ERR6005003	602693	Bangladesh	South Asia	3a	3a	3a	3a/5b	negative	positive	negative	negative	negative	negative	positive	positive	negative	negative	negative	negative	negative	negative	negative
ERR6005005		ERR6005005	602706	Bangladesh	South Asia	3a	3a	3a	3a/5b	negative	positive	negative	negative	negative	negative	positive	positive	negative	negative	negative	negative	negative	negative	negative
ERR6005552		ERR6005552	602710	Bangladesh	South Asia	S. sonnei	S. sonnei	S. sonnei	S. sonnei	negative	positive	positive	negative	negative	negative	negative	negative	negative	negative	negative	negative	negative	negative	negative
ERR6005006		ERR6005006	602714	Bangladesh	South Asia	2a	2a	2a	2a	negative	positive	negative	negative	positive	negative	negative	negative	negative	negative	negative	negative	negative	negative	negative
ERR6005007		ERR6005007	602719	Bangladesh	South Asia	2b	2b	2b	2b	negative	positive	negative	negative	positive	negative	negative	positive	negative	negative	negative	negative	negative	negative	negative
ERR6005553	ERR6006331	Merged	602720	Bangladesh	South Asia	S. sonnei	S. sonnei	S. sonnei	S. sonnei	negative	positive	positive	negative	negative	negative	negative	negative	negative	negative	negative	negative	negative	negative	negative
ERR6005555		ERR6005555	602730	Bangladesh	South Asia	S. sonnei	S. sonnei	S. sonnei	S. sonnei	negative	positive	positive	negative	negative	negative	negative	negative	negative	negative	negative	negative	negative	negative	negative
ERR6005556		ERR6005556	602737	Bangladesh	South Asia	S. sonnei	S. sonnei	S. sonnei	S. sonnei	negative	positive	positive	negative	negative	negative	negative	negative	negative	negative	negative	negative	negative	negative	negative
ERR6005004		ERR6005004	602755	Bangladesh	South Asia	2a	2a	2a	2a	negative	positive	negative	negative	positive	negative	negative	negative	negative	negative	negative	negative	negative	negative	negative
ERR6005557		ERR6005557	602758	Bangladesh	South Asia	S. sonnei	S. sonnei	S. sonnei	S. sonnei	negative	positive	positive	negative	negative	negative	negative	negative	negative	negative	negative	negative	negative	negative	negative
ERR6005008		ERR6005008	602774	Bangladesh	South Asia	2a	2a	2a	2a	negative	positive	negative	negative	positive	negative	negative	negative	negative	negative	negative	negative	negative	negative	negative
ERR6005009		ERR6005009	602784	Bangladesh	South Asia	3a	5b	5b	3a/5b	negative	positive	negative	negative	negative	negative	positive	positive	negative	negative	negative	negative	negative	negative	negative
ERR6005559		ERR6005559	602789	Bangladesh	South Asia	S. sonnei	S. sonnei	S. sonnei	S. sonnei	negative	positive	positive	negative	negative	negative	negative	negative	negative	negative	negative	negative	negative	negative	negative
ERR6005012		ERR6005012	602826	Bangladesh	South Asia	3a	5b	5b	3a/5b	negative	positive	negative	negative	negative	negative	positive	positive	negative	negative	negative	negative	negative	negative	negative
ERR6005558		ERR6005558	602841	Bangladesh	South Asia	S. sonnei	S. sonnei	S. sonnei	S. sonnei	negative	positive	positive	negative	negative	negative	negative	negative	negative	negative	negative	negative	negative	negative	negative
ERR6005013		ERR6005013	602850	Bangladesh	South Asia	6	6	6	Shigella/EIEC	negative	positive	negative	negative	negative	negative	negative	negative	negative	negative	negative	negative	negative	negative	negative
ERR6005560		ERR6005560	602852	Bangladesh	South Asia	S. sonnei	S. sonnei	S. sonnei	S. sonnei	negative	positive	positive	negative	negative	negative	negative	negative	negative	negative	negative	negative	negative	negative	negative
ERR6005015		ERR6005015	602855	Bangladesh	South Asia	4a	4av	4av	Shigella/EIEC	negative	positive	negative	negative	negative	negative	negative	negative	negative	negative	negative	negative	negative	negative	negative
ERR6005016		ERR6005016	602856	Bangladesh	South Asia	3a	3a	3a	3a/5b	negative	positive	negative	negative	negative	negative	positive	positive	negative	negative	negative	negative	negative	negative	negative
ERR6005017		ERR6005017	602857	Bangladesh	South Asia	6	6	6	Shigella/EIEC	negative	positive	negative	negative	negative	negative	negative	negative	negative	negative	negative	negative	negative	negative	negative
ERR6005561		ERR6005561	602868	Bangladesh	South Asia	S. sonnei	S. sonnei	S. sonnei	S. sonnei	negative	positive	positive	negative	negative	negative	negative	negative	negative	negative	negative	negative	negative	negative	negative
ERR6005018		ERR6005018	602872	Bangladesh	South Asia	3a	3a	3a	3a/5b	negative	positive	negative	negative	negative	negative	positive	positive	negative	negative	negative	negative	negative	negative	negative
ERR6005019		ERR6005019	602877	Bangladesh	South Asia	2b	2b	2b	2b	negative	positive	negative	negative	positive	negative	negative	positive	negative	negative	negative	negative	negative	negative	negative
ERR6005562		ERR6005562	602878	Bangladesh	South Asia	S. sonnei	S. sonnei	S. sonnei	S. sonnei	negative	positive	positive	negative	negative	negative	negative	negative	negative	negative	negative	negative	negative	negative	negative
ERR6005564		ERR6005564	602900	Bangladesh	South Asia	S. sonnei	S. sonnei	S. sonnei	S. sonnei	negative	positive	positive	negative	negative	negative	negative	negative	negative	negative	negative	negative	negative	negative	positive
ERR6005565		ERR6005565	602905	Bangladesh	South Asia	S. sonnei	S. sonnei	S. sonnei	S. sonnei	negative	positive	positive	negative	negative	negative	negative	negative	negative	negative	negative	negative	negative	negative	negative
ERR6005021		ERR6005021	602907	Bangladesh	South Asia	2b	2b	2b	2b	negative	positive	negative	negative	positive	negative	negative	positive	negative	negative	negative	negative	negative	negative	negative
ERR6005022		ERR6005022	602913	Bangladesh	South Asia	2a	2a	2a	2a	negative	positive	negative	negative	positive	negative	negative	negative	negative	negative	negative	negative	negative	negative	negative
ERR6005023		ERR6005023	602914	Bangladesh	South Asia	1b	1b	1b	1b	negative	positive	negative	positive	negative	positive	negative	negative	negative	negative	negative	negative	negative	negative	negative
ERR6005024		ERR6005024	602921	Bangladesh	South Asia	2b	2b	2b	2b	negative	positive	negative	negative	positive	negative	negative	positive	negative	negative	negative	negative	negative	negative	negative
ERR6005059		ERR6005059	602925	Bangladesh	South Asia	1b	1b	1b	1b	negative	positive	negative	positive	negative	positive	negative	negative	negative	negative	negative	negative	negative	negative	negative
ERR6005025		ERR6005025	602927	Bangladesh	South Asia	1b	1b	1b	1b	negative	positive	negative	positive	negative	positive	negative	negative	negative	negative	negative	negative	negative	negative	negative
ERR6005566		ERR6005566	602932	Bangladesh	South Asia	S. sonnei	S. sonnei	S. sonnei	S. sonnei	negative	positive	positive	negative	negative	negative	negative	negative	negative	negative	negative	negative	negative	negative	negative
ERR6005020		ERR6005020	602935	Bangladesh	South Asia	3a	5b	5b	3a/5b	negative	positive	negative	negative	negative	negative	positive	positive	negative	negative	negative	negative	negative	negative	negative
ERR6005568		ERR6005568	602936	Bangladesh	South Asia	S. sonnei	S. sonnei	S. sonnei	S. sonnei	negative	positive	positive	negative	negative	negative	negative	negative	negative	negative	negative	negative	negative	negative	negative
ERR6005570		ERR6005570	602961	Bangladesh	South Asia	S. sonnei	S. sonnei	S. sonnei	S. sonnei	negative	positive	positive	negative	negative	negative	negative	negative	negative	negative	negative	negative	negative	negative	negative
ERR6005026		ERR6005026	602962	Bangladesh	South Asia	3a	3a	3a	3a/5b	negative	positive	negative	negative	negative	negative	positive	positive	negative	negative	negative	negative	negative	negative	negative
ERR6005027		ERR6005027	602979	Bangladesh	South Asia	2b	2b	2b	2b	negative	positive	negative	negative	positive	negative	negative	positive	negative	negative	negative	negative	negative	negative	negative
ERR6005028		ERR6005028	602985	Bangladesh	South Asia	3a	5b	5b	3a/5b	negative	positive	negative	negative	negative	negative	positive	positive	negative	negative	negative	negative	negative	negative	negative
ERR6005029		ERR6005029	602999	Bangladesh	South Asia	6	6	6	Shigella/EIEC	negative	positive	negative	negative	negative	negative	negative	negative	negative	negative	negative	negative	negative	negative	negative
ERR6005567		ERR6005567	603011	Bangladesh	South Asia	S. sonnei	S. sonnei	S. sonnei	S. sonnei	negative	positive	positive	negative	negative	negative	negative	negative	negative	negative	negative	negative	negative	negative	negative
ERR6005032		ERR6005032	603020	Bangladesh	South Asia	6	6	6	Shigella/EIEC	negative	positive	negative	negative	negative	negative	negative	negative	negative	negative	negative	negative	negative	negative	negative
ERR6005033		ERR6005033	603021	Bangladesh	South Asia	6	6	6	Shigella/EIEC	negative	positive	negative	negative	negative	negative	negative	negative	negative	negative	negative	negative	negative	negative	negative
ERR6005571		ERR6005571	603025	Bangladesh	South Asia	S. sonnei	S. sonnei	S. sonnei	S. sonnei	negative	positive	positive	negative	negative	negative	negative	negative	negative	negative	negative	negative	negative	negative	negative
ERR6005034		ERR6005034	603026	Bangladesh	South Asia	1b	1b	1b	1b	negative	positive	negative	positive	negative	positive	negative	negative	negative	negative	negative	negative	negative	negative	negative
ERR6005035		ERR6005035	603030	Bangladesh	South Asia	1c(7a)	1c(7a)	1c(7a)	1a/1c(7a)	negative	positive	negative	positive	negative	negative	negative	negative	negative	negative	negative	negative	negative	negative	negative
ERR6005036		ERR6005036	603039	Bangladesh	South Asia	1c(7a)	1c(7a)	1c(7a)	1a/1c(7a)	negative	positive	negative	positive	negative	negative	negative	negative	negative	negative	negative	negative	negative	negative	negative
ERR6005037		ERR6005037	603040	Bangladesh	South Asia	2a	2a	2a	2a	negative	positive	negative	negative	positive	negative	negative	negative	negative	negative	negative	negative	negative	negative	negative
ERR6005038		ERR6005038	603041	Bangladesh	South Asia	6	6	6	Shigella/EIEC	negative	positive	negative	negative	negative	negative	negative	negative	negative	negative	negative	negative	negative	negative	negative
ERR6005031		ERR6005031	603047	Bangladesh	South Asia	2b	2b	2b	2b	negative	positive	negative	negative	positive	negative	negative	positive	negative	negative	negative	negative	negative	negative	negative
ERR6005572		ERR6005572	603058	Bangladesh	South Asia	S. sonnei	S. sonnei	non-Shigella/EIEC	S. sonnei	negative	positive	positive	negative	negative	negative	negative	negative	negative	negative	negative	negative	negative	negative	negative
ERR6005039		ERR6005039	603076	Bangladesh	South Asia	2a	2a	2a	2a	negative	positive	negative	negative	positive	negative	negative	negative	negative	negative	negative	negative	negative	negative	negative
ERR6005574		ERR6005574	603078	Bangladesh	South Asia	S. sonnei	S. sonnei	S. sonnei	S. sonnei	negative	positive	positive	negative	negative	negative	negative	negative	negative	negative	negative	negative	negative	negative	negative
ERR6005040		ERR6005040	603079	Bangladesh	South Asia	3a	3a	3a	3a/5b	negative	positive	negative	negative	negative	negative	positive	positive	negative	negative	negative	negative	negative	negative	negative
ERR6005575		ERR6005575	603084	Bangladesh	South Asia	S. sonnei	S. sonnei	S. sonnei	S. sonnei	negative	positive	positive	negative	negative	negative	negative	negative	negative	negative	negative	negative	negative	negative	negative
ERR6005576		ERR6005576	603085	Bangladesh	South Asia	S. sonnei	S. sonnei	S. sonnei	S. sonnei	negative	positive	positive	negative	negative	negative	negative	negative	negative	negative	negative	negative	negative	negative	negative
ERR6005041		ERR6005041	603091	Bangladesh	South Asia	3a	5b	5b	3a/5b	negative	positive	negative	negative	negative	negative	positive	positive	negative	negative	negative	negative	negative	negative	negative
ERR6005042	ERR6006333	Merged	603092	Bangladesh	South Asia	6	6	6	Shigella/EIEC	negative	positive	negative	negative	negative	negative	negative	negative	negative	negative	negative	negative	negative	negative	negative
ERR6005577		ERR6005577	603099	Bangladesh	South Asia	S. sonnei	S. sonnei	S. sonnei	S. sonnei	negative	positive	positive	negative	negative	negative	negative	negative	negative	negative	negative	negative	negative	negative	negative
ERR6005573		ERR6005573	603100	Bangladesh	South Asia	S. sonnei	S. sonnei	S. sonnei	S. sonnei	negative	positive	positive	negative	negative	negative	negative	negative	negative	negative	negative	negative	negative	negative	negative
ERR6005043		ERR6005043	603101	Bangladesh	South Asia	4a	6	6	Shigella/EIEC	negative	positive	negative	negative	negative	negative	negative	negative	negative	negative	negative	negative	negative	negative	negative
ERR6005045		ERR6005045	603109	Bangladesh	South Asia	3a	3a	3a	3a/5b	negative	positive	negative	negative	negative	negative	positive	positive	negative	negative	negative	negative	negative	negative	negative
ERR6005046		ERR6005046	603113	Bangladesh	South Asia	2a	2a	2a	2a	negative	positive	negative	negative	positive	negative	negative	negative	negative	negative	negative	negative	negative	negative	negative
ERR6005047		ERR6005047	603114	Bangladesh	South Asia	2a	2a	2a	2a	negative	positive	negative	negative	positive	negative	negative	negative	negative	negative	negative	negative	negative	negative	negative
ERR6005578		ERR6005578	603131	Bangladesh	South Asia	S. sonnei	S. sonnei	S. sonnei	S. sonnei	negative	positive	positive	negative	negative	negative	negative	negative	negative	negative	negative	negative	negative	negative	negative
ERR6005579		ERR6005579	603137	Bangladesh	South Asia	S. sonnei	S. sonnei	S. sonnei	S. sonnei	negative	positive	positive	negative	negative	negative	negative	negative	negative	negative	negative	negative	negative	negative	negative
ERR6005580		ERR6005580	603166	Bangladesh	South Asia	S. sonnei	S. sonnei	S. sonnei	S. sonnei	negative	positive	positive	negative	negative	negative	negative	negative	negative	negative	negative	negative	negative	negative	negative
ERR6005044		ERR6005044	603179	Bangladesh	South Asia	6	4av	4av	Shigella/EIEC	negative	positive	negative	negative	negative	negative	negative	negative	negative	negative	negative	negative	negative	negative	negative
ERR6005048		ERR6005048	603183	Bangladesh	South Asia	Y	Xv(4c)	Xv	X/Xv	negative	positive	negative	negative	negative	negative	negative	positive	negative	negative	negative	negative	negative	negative	negative
ERR6005050		ERR6005050	603219	Bangladesh	South Asia	2a	2a	2a	2a	negative	positive	negative	negative	positive	negative	negative	negative	negative	negative	negative	negative	negative	negative	negative
ERR6005582		ERR6005582	603241	Bangladesh	South Asia	S. sonnei	S. sonnei	S. sonnei	S. sonnei	negative	positive	positive	negative	negative	negative	negative	negative	negative	negative	negative	negative	negative	negative	negative
ERR6005051		ERR6005051	603245	Bangladesh	South Asia	2b	2b	2b	2b	negative	positive	negative	negative	positive	negative	negative	positive	negative	negative	negative	negative	negative	negative	negative
ERR6005583		ERR6005583	603246	Bangladesh	South Asia	S. sonnei	S. sonnei	S. sonnei	S. sonnei	negative	positive	positive	negative	negative	negative	negative	negative	negative	negative	negative	negative	negative	negative	negative
ERR6005052		ERR6005052	603251	Bangladesh	South Asia	2b	2b	2b	2b	negative	positive	negative	negative	positive	negative	negative	positive	negative	negative	negative	negative	negative	negative	negative
ERR6005584		ERR6005584	603261	Bangladesh	South Asia	S. sonnei	S. sonnei	S. sonnei	S. sonnei	negative	positive	positive	negative	negative	negative	negative	negative	negative	negative	negative	negative	negative	negative	negative
ERR6005585		ERR6005585	603268	Bangladesh	South Asia	S. sonnei	EIEC	S. sonnei	S. sonnei	negative	positive	positive	negative	negative	negative	negative	negative	negative	negative	negative	negative	negative	negative	negative
ERR6005586		ERR6005586	603285	Bangladesh	South Asia	S. sonnei	S. sonnei	S. sonnei	S. sonnei	negative	positive	positive	negative	negative	negative	negative	negative	negative	negative	negative	negative	negative	negative	negative
ERR6005587		ERR6005587	603286	Bangladesh	South Asia	S. sonnei	EIEC	S. sonnei	S. sonnei	negative	positive	positive	negative	negative	negative	negative	negative	negative	negative	negative	negative	negative	negative	negative
ERR6005588		ERR6005588	603318	Bangladesh	South Asia	S. sonnei	S. sonnei	S. sonnei	S. sonnei	negative	positive	positive	negative	negative	negative	negative	negative	negative	negative	negative	negative	negative	negative	negative
ERR6005589		ERR6005589	603323	Bangladesh	South Asia	S. sonnei	S. sonnei	S. sonnei	S. sonnei	negative	positive	positive	negative	negative	negative	negative	negative	negative	negative	negative	negative	negative	negative	negative
ERR6005053		ERR6005053	603327	Bangladesh	South Asia	2a	2av	2a	2a	negative	positive	negative	negative	positive	negative	negative	negative	negative	negative	negative	negative	negative	negative	negative
ERR6005056		ERR6005056	603337	Bangladesh	South Asia	3b	Novel	5a	Shigella/EIEC	negative	positive	negative	negative	negative	negative	positive	negative	negative	negative	negative	negative	negative	negative	negative
ERR6005169		ERR6005169	603345	Bangladesh	South Asia	6	6	6	Shigella/EIEC	negative	positive	negative	negative	negative	negative	negative	negative	negative	negative	negative	negative	negative	negative	positive
ERR6005394		ERR6005394	603355	Bangladesh	South Asia	4a	4av	4av	Shigella/EIEC	negative	positive	negative	negative	negative	negative	negative	negative	negative	negative	negative	negative	negative	negative	negative
ERR6005168		ERR6005168	603358	Bangladesh	South Asia	2a	2a	2a	2a	negative	positive	negative	negative	positive	negative	negative	negative	negative	negative	negative	negative	negative	negative	negative
ERR6005395		ERR6005395	603368	Bangladesh	South Asia	4a	4av	4av	Shigella/EIEC	negative	positive	negative	negative	negative	negative	negative	negative	negative	negative	negative	negative	negative	negative	negative
ERR6005170		ERR6005170	603403	Bangladesh	South Asia	3a	3a	3a	3a/5b	negative	positive	negative	negative	negative	negative	positive	positive	negative	negative	negative	negative	negative	negative	negative
ERR6005173		ERR6005173	603422	Bangladesh	South Asia	2a	2a	2a	2a	negative	positive	negative	negative	positive	negative	negative	negative	negative	negative	negative	negative	negative	negative	negative
ERR6005174		ERR6005174	603430	Bangladesh	South Asia	2a	2a	2a	2a	negative	positive	negative	negative	positive	negative	negative	negative	negative	negative	negative	negative	negative	negative	negative
ERR6005387	ERR6006334	Merged	603435	Bangladesh	South Asia	1b	Novel	Unknown	Shigella/EIEC	negative	positive	negative	positive	positive	positive	negative	negative	negative	negative	negative	negative	negative	negative	negative
ERR6005176		ERR6005176	603451	Bangladesh	South Asia	2b	2b	2b	2b	negative	positive	negative	negative	positive	negative	negative	positive	negative	negative	negative	negative	negative	negative	positive
ERR6005177		ERR6005177	603476	Bangladesh	South Asia	2a	2a	2a	2a	negative	positive	negative	negative	positive	negative	negative	negative	negative	negative	negative	negative	negative	negative	negative
ERR6005178		ERR6005178	603503	Bangladesh	South Asia	3a	No prediction	5b	3a/5b	negative	positive	negative	negative	negative	negative	positive	positive	negative	negative	negative	negative	negative	negative	negative
ERR6005179		ERR6005179	603554	Bangladesh	South Asia	2b	2b	2b	2b	negative	positive	negative	negative	positive	negative	negative	positive	negative	negative	negative	negative	negative	negative	negative
ERR6005181		ERR6005181	603560	Bangladesh	South Asia	2b	2b	2b	2b	negative	positive	negative	negative	positive	negative	negative	positive	negative	negative	negative	negative	negative	negative	negative
ERR6005388		ERR6005388	603569	Bangladesh	South Asia	1b	1b	1b	1b	negative	positive	negative	positive	negative	positive	negative	negative	negative	negative	negative	negative	negative	negative	negative
ERR6005183		ERR6005183	603608	Bangladesh	South Asia	3a	5b	5b	3a/5b	negative	positive	negative	negative	negative	negative	positive	positive	negative	negative	negative	negative	negative	negative	negative
ERR6005184		ERR6005184	603625	Bangladesh	South Asia	2b	2b	2b	2b	negative	positive	negative	negative	positive	negative	negative	positive	negative	negative	negative	negative	negative	negative	negative
ERR6005627		ERR6005627	603632	Bangladesh	South Asia	S. sonnei	S. sonnei	S. sonnei	S. sonnei	negative	positive	positive	negative	negative	negative	negative	negative	negative	negative	negative	negative	negative	negative	negative
ERR6005185		ERR6005185	603636	Bangladesh	South Asia	6	6	6	Shigella/EIEC	negative	positive	negative	negative	negative	negative	negative	negative	negative	negative	negative	negative	negative	negative	negative
ERR6005628		ERR6005628	603637	Bangladesh	South Asia	S. sonnei	S. sonnei	S. sonnei	S. sonnei	negative	positive	positive	negative	negative	negative	negative	negative	negative	negative	negative	negative	negative	negative	negative
ERR6005180		ERR6005180	603642	Bangladesh	South Asia	3a	3a	3a	3a/5b	negative	positive	negative	negative	negative	negative	positive	positive	negative	negative	negative	negative	negative	negative	negative
ERR6005186		ERR6005186	603651	Bangladesh	South Asia	6	6	6	Shigella/EIEC	negative	positive	negative	negative	negative	negative	negative	negative	negative	negative	negative	negative	negative	negative	negative
ERR6005187		ERR6005187	603662	Bangladesh	South Asia	2b	2b	2b	2b	negative	positive	negative	negative	positive	negative	negative	positive	negative	negative	negative	negative	negative	negative	negative
ERR6005188		ERR6005188	603663	Bangladesh	South Asia	2a	2a	2a	2a	negative	positive	negative	negative	positive	negative	negative	negative	negative	negative	negative	negative	negative	negative	negative
ERR6005631		ERR6005631	603666	Bangladesh	South Asia	S. sonnei	S. sonnei	S. sonnei	S. sonnei	negative	positive	positive	negative	negative	negative	negative	negative	negative	negative	negative	negative	negative	negative	negative
ERR6005632		ERR6005632	603669	Bangladesh	South Asia	S. sonnei	S. sonnei	S. sonnei	S. sonnei	negative	positive	positive	negative	negative	negative	negative	negative	negative	negative	negative	negative	negative	negative	negative
ERR6005633		ERR6005633	603670	Bangladesh	South Asia	S. sonnei	S. sonnei	S. sonnei	S. sonnei	negative	positive	positive	negative	negative	negative	negative	negative	negative	negative	negative	negative	negative	negative	negative
ERR6005634		ERR6005634	603671	Bangladesh	South Asia	S. sonnei	S. sonnei	S. sonnei	S. sonnei	negative	positive	positive	negative	negative	negative	negative	negative	negative	negative	negative	negative	negative	negative	negative
ERR6005189	ERR6006336	Merged	603683	Bangladesh	South Asia	6	6	6	Shigella/EIEC	negative	positive	negative	negative	negative	negative	negative	negative	negative	negative	negative	negative	negative	negative	negative
ERR6005629		ERR6005629	603688	Bangladesh	South Asia	S. sonnei	EIEC	S. sonnei	S. sonnei	negative	positive	positive	negative	negative	negative	negative	negative	negative	negative	negative	negative	negative	negative	negative
ERR6005193		ERR6005193	603694	Bangladesh	South Asia	6	6	6	Shigella/EIEC	negative	positive	negative	negative	negative	negative	negative	negative	negative	negative	negative	negative	negative	negative	negative
ERR6005196		ERR6005196	603696	Bangladesh	South Asia	2b	2b	2b	2b	negative	positive	negative	negative	positive	negative	negative	positive	negative	negative	negative	negative	negative	negative	negative
ERR6005197		ERR6005197	603698	Bangladesh	South Asia	5b	2b	2b	2b	negative	positive	negative	negative	positive	negative	negative	positive	negative	negative	negative	negative	negative	negative	negative
ERR6005198		ERR6005198	603705	Bangladesh	South Asia	2a	2b	2b	2b	negative	positive	negative	negative	positive	negative	negative	positive	negative	negative	negative	negative	negative	negative	negative
ERR6005199		ERR6005199	603706	Bangladesh	South Asia	2a	2a	2a	2a	negative	positive	negative	negative	positive	negative	negative	negative	negative	negative	negative	negative	negative	negative	negative
ERR6005191		ERR6005191	603715	Bangladesh	South Asia	6	6	6	Shigella/EIEC	negative	positive	negative	negative	negative	negative	negative	negative	negative	negative	negative	negative	negative	negative	negative
ERR6005200		ERR6005200	603720	Bangladesh	South Asia	2a	2a	2a	2a	negative	positive	negative	negative	positive	negative	negative	negative	negative	negative	negative	negative	negative	negative	negative
ERR6005635	ERR6006337	Merged	603727	Bangladesh	South Asia	S. sonnei	EIEC	EIEC	S. sonnei	negative	positive	positive	negative	negative	negative	negative	negative	negative	negative	negative	negative	negative	negative	negative
ERR6005202		ERR6005202	603749	Bangladesh	South Asia	2a	2a	2a	2a	negative	positive	negative	negative	positive	negative	negative	negative	negative	negative	negative	negative	negative	negative	negative
ERR6005636		ERR6005636	603757	Bangladesh	South Asia	S. sonnei	EIEC	S. sonnei	S. sonnei	negative	positive	positive	negative	negative	negative	negative	negative	negative	negative	negative	negative	negative	negative	negative
ERR6005204		ERR6005204	603765	Bangladesh	South Asia	2a	2a	2a	2a	negative	positive	negative	negative	positive	negative	negative	negative	negative	negative	negative	negative	negative	negative	negative
ERR6005389		ERR6005389	603766	Bangladesh	South Asia	6	No prediction	6	Shigella/EIEC	negative	positive	negative	negative	negative	negative	negative	negative	negative	negative	negative	negative	negative	negative	negative
ERR6005638		ERR6005638	603768	Bangladesh	South Asia	S. sonnei	S. sonnei	S. sonnei	S. sonnei	negative	positive	positive	negative	negative	negative	negative	negative	negative	negative	negative	negative	negative	negative	negative
ERR6005201		ERR6005201	603781	Bangladesh	South Asia	3a	3a	3a	3a/5b	negative	positive	negative	negative	negative	negative	positive	positive	negative	negative	negative	negative	negative	negative	negative
ERR6005639		ERR6005639	603784	Bangladesh	South Asia	S. sonnei	S. sonnei	S. sonnei	S. sonnei	negative	positive	positive	negative	negative	negative	negative	negative	negative	negative	negative	negative	negative	negative	negative
ERR6005640		ERR6005640	603786	Bangladesh	South Asia	S. sonnei	S. sonnei	S. sonnei	S. sonnei	negative	positive	positive	negative	negative	negative	negative	negative	negative	negative	negative	negative	negative	negative	negative
ERR6005206		ERR6005206	603787	Bangladesh	South Asia	2b	2b	2b	2b	negative	positive	negative	negative	positive	negative	negative	positive	negative	negative	negative	negative	negative	negative	negative
ERR6005207	ERR6006338	Merged	603801	Bangladesh	South Asia	1b	1b	1b	1b	negative	positive	negative	positive	negative	positive	negative	negative	negative	negative	negative	negative	negative	negative	negative
ERR6005641		ERR6005641	603802	Bangladesh	South Asia	S. sonnei	S. sonnei	S. sonnei	S. sonnei	negative	positive	positive	negative	negative	negative	negative	negative	negative	negative	negative	negative	negative	negative	negative
ERR6005208		ERR6005208	603804	Bangladesh	South Asia	6	6	6	Shigella/EIEC	negative	positive	negative	negative	negative	negative	negative	negative	negative	negative	negative	negative	negative	negative	negative
ERR6005643		ERR6005643	603812	Bangladesh	South Asia	S. sonnei	S. sonnei	S. sonnei	S. sonnei	negative	positive	positive	negative	negative	negative	negative	negative	negative	negative	negative	negative	negative	negative	negative
ERR6005205		ERR6005205	603814	Bangladesh	South Asia	6	6	6	Shigella/EIEC	negative	positive	negative	negative	negative	negative	negative	negative	negative	negative	negative	negative	negative	negative	negative
ERR6005390		ERR6005390	603815	Bangladesh	South Asia	4a	4av	4av	Shigella/EIEC	negative	positive	negative	negative	negative	negative	negative	negative	negative	negative	negative	negative	negative	negative	negative
ERR6005644		ERR6005644	603817	Bangladesh	South Asia	S. sonnei	S. sonnei	S. sonnei	S. sonnei	negative	positive	positive	negative	negative	negative	negative	negative	negative	negative	negative	negative	negative	negative	negative
ERR6005210		ERR6005210	603851	Bangladesh	South Asia	2b	2b	2b	2b	negative	positive	negative	negative	positive	negative	negative	positive	negative	negative	negative	negative	negative	negative	negative
ERR6005211		ERR6005211	603854	Bangladesh	South Asia	2b	2b	2b	2b	negative	positive	negative	negative	positive	negative	negative	positive	negative	negative	negative	negative	negative	negative	negative
ERR6005212		ERR6005212	603855	Bangladesh	South Asia	2b	2b	2b	2b	negative	positive	negative	negative	positive	negative	negative	positive	negative	negative	negative	negative	negative	negative	positive
ERR6005213		ERR6005213	603859	Bangladesh	South Asia	3a	5b	5b	3a/5b	negative	positive	negative	negative	negative	negative	positive	positive	negative	negative	negative	negative	negative	negative	negative
ERR6005214		ERR6005214	603867	Bangladesh	South Asia	2b	2b	2b	2b	negative	positive	negative	negative	positive	negative	negative	positive	negative	negative	negative	negative	negative	negative	negative
ERR6005646		ERR6005646	603869	Bangladesh	South Asia	S. sonnei	S. sonnei	S. sonnei	S. sonnei	negative	positive	positive	negative	negative	negative	negative	negative	negative	negative	negative	negative	negative	negative	negative
ERR6005215		ERR6005215	603870	Bangladesh	South Asia	2a	2a	2a	2a	negative	positive	negative	negative	positive	negative	negative	negative	negative	negative	negative	negative	negative	negative	negative
ERR6005648		ERR6005648	603894	Bangladesh	South Asia	S. sonnei	EIEC	S. sonnei	S. sonnei	negative	positive	positive	negative	negative	negative	negative	negative	negative	negative	negative	negative	negative	negative	negative
ERR6005219	ERR6006340	Merged	603901	Bangladesh	South Asia	6	6	6	Shigella/EIEC	negative	positive	negative	negative	negative	negative	negative	negative	negative	negative	negative	negative	negative	negative	negative
ERR6005220		ERR6005220	603913	Bangladesh	South Asia	2b	2b	2b	2b	negative	positive	negative	negative	positive	negative	negative	positive	negative	negative	negative	negative	negative	negative	negative
ERR6005221		ERR6005221	603922	Bangladesh	South Asia	6	6	6	Shigella/EIEC	negative	positive	negative	negative	negative	negative	negative	negative	negative	negative	negative	negative	negative	negative	negative
ERR6005647		ERR6005647	603923	Bangladesh	South Asia	S. sonnei	S. sonnei	non-Shigella/EIEC	S. sonnei	negative	positive	positive	negative	negative	negative	negative	negative	negative	negative	negative	negative	negative	negative	negative
ERR6005649		ERR6005649	603944	Bangladesh	South Asia	S. sonnei	S. sonnei	S. sonnei	S. sonnei	negative	positive	positive	negative	negative	negative	negative	negative	negative	negative	negative	negative	negative	negative	negative
ERR6005224	ERR6006342	Merged	603966	Bangladesh	South Asia	6	6	6	Shigella/EIEC	negative	positive	negative	negative	negative	negative	negative	negative	negative	negative	negative	negative	negative	negative	negative
ERR6005225	ERR6006343	Merged	603973	Bangladesh	South Asia	2a	2a	2a	2a	negative	positive	negative	negative	positive	negative	negative	negative	negative	negative	negative	negative	negative	negative	negative
ERR6005651	ERR6006345	Merged	603980	Bangladesh	South Asia	S. sonnei	S. sonnei	EIEC	S. sonnei	negative	positive	positive	negative	negative	negative	negative	negative	negative	negative	negative	negative	negative	negative	negative
ERR6005652		ERR6005652	603982	Bangladesh	South Asia	S. sonnei	S. sonnei	S. sonnei	S. sonnei	negative	positive	positive	negative	negative	negative	negative	negative	negative	negative	negative	negative	negative	negative	negative
ERR6005226		ERR6005226	603990	Bangladesh	South Asia	2a	2a	2a	2a	negative	positive	negative	negative	positive	negative	negative	negative	negative	negative	negative	negative	negative	negative	negative
ERR6005222		ERR6005222	604000	Bangladesh	South Asia	3a	3a	3a	3a/5b	negative	positive	negative	negative	negative	negative	positive	positive	negative	negative	negative	negative	negative	negative	negative
ERR6005227		ERR6005227	604001	Bangladesh	South Asia	6	6	6	Shigella/EIEC	negative	positive	negative	negative	negative	negative	negative	negative	negative	negative	negative	negative	negative	negative	negative
ERR6005653		ERR6005653	604002	Bangladesh	South Asia	S. sonnei	S. sonnei	S. sonnei	S. sonnei	negative	positive	positive	negative	negative	negative	negative	negative	negative	negative	negative	negative	negative	negative	negative
ERR6005228		ERR6005228	604003	Bangladesh	South Asia	3a	5b	5b	3a/5b	negative	positive	negative	negative	negative	negative	positive	positive	negative	negative	negative	negative	negative	negative	negative
ERR6005229		ERR6005229	604006	Bangladesh	South Asia	6	6	6	Shigella/EIEC	negative	positive	negative	negative	negative	negative	negative	negative	negative	negative	negative	negative	negative	negative	negative
ERR6005230		ERR6005230	604008	Bangladesh	South Asia	6	6	6	Shigella/EIEC	negative	positive	negative	negative	negative	negative	negative	negative	negative	negative	negative	negative	negative	negative	negative
ERR6005314		ERR6005314	604014	Bangladesh	South Asia	6	6	6	Shigella/EIEC	negative	positive	negative	negative	negative	negative	negative	negative	negative	negative	negative	negative	negative	negative	negative
ERR6005315		ERR6005315	604015	Bangladesh	South Asia	6	6	6	Shigella/EIEC	negative	positive	negative	negative	negative	negative	negative	negative	negative	negative	negative	negative	negative	negative	negative
ERR6005691	ERR6006346	Merged	604016	Bangladesh	South Asia	S. sonnei	S. sonnei	S. sonnei	S. sonnei	negative	positive	positive	negative	negative	negative	negative	negative	negative	negative	negative	negative	negative	negative	negative
ERR6005692		ERR6005692	604025	Bangladesh	South Asia	S. sonnei	S. sonnei	non-Shigella/EIEC	S. sonnei	negative	positive	positive	negative	negative	negative	negative	negative	negative	negative	negative	negative	negative	negative	negative
ERR6005317		ERR6005317	604053	Bangladesh	South Asia	2a	2a	2a	2a	negative	positive	negative	negative	positive	negative	negative	negative	negative	negative	negative	negative	negative	negative	negative
ERR6005318		ERR6005318	604056	Bangladesh	South Asia	3a	5b	5b	3a/5b	negative	positive	negative	negative	negative	negative	positive	positive	negative	negative	negative	negative	negative	negative	negative
ERR6005693		ERR6005693	604057	Bangladesh	South Asia	S. sonnei	S. sonnei	S. sonnei	S. sonnei	negative	positive	positive	negative	negative	negative	negative	negative	negative	negative	negative	negative	negative	negative	negative
ERR6005319		ERR6005319	604058	Bangladesh	South Asia	2a	2a	2a	2a	negative	positive	negative	negative	positive	negative	negative	negative	negative	negative	negative	negative	negative	negative	negative
ERR6005320		ERR6005320	604060	Bangladesh	South Asia	6	6	6	Shigella/EIEC	negative	positive	negative	negative	negative	negative	negative	negative	negative	negative	negative	negative	negative	negative	negative
ERR6005321		ERR6005321	604073	Bangladesh	South Asia	2b	2b	2b	2b	negative	positive	negative	negative	positive	negative	negative	positive	negative	negative	negative	negative	negative	negative	negative
ERR6005322		ERR6005322	604074	Bangladesh	South Asia	2b	2b	2b	2b	negative	positive	negative	negative	positive	negative	negative	positive	negative	negative	negative	negative	negative	negative	negative
ERR6005323		ERR6005323	604075	Bangladesh	South Asia	2b	2b	2b	2b	negative	positive	negative	negative	positive	negative	negative	positive	negative	negative	negative	negative	negative	negative	negative
ERR6005694		ERR6005694	604081	Bangladesh	South Asia	S. sonnei	S. sonnei	S. sonnei	S. sonnei	negative	positive	positive	negative	negative	negative	negative	negative	negative	negative	negative	negative	negative	negative	negative
ERR6005324		ERR6005324	604083	Bangladesh	South Asia	2a	2a	2a	2a	negative	positive	negative	negative	positive	negative	negative	negative	negative	negative	negative	negative	negative	negative	negative
ERR6005316		ERR6005316	604088	Bangladesh	South Asia	6	6	6	Shigella/EIEC	negative	positive	negative	negative	negative	negative	negative	negative	negative	negative	negative	negative	negative	negative	negative
ERR6005695		ERR6005695	604091	Bangladesh	South Asia	S. sonnei	S. sonnei	S. sonnei	S. sonnei	negative	positive	positive	negative	negative	negative	negative	negative	negative	negative	negative	negative	negative	negative	negative
ERR6005698	ERR6006347	Merged	604118	Bangladesh	South Asia	S. sonnei	EIEC	S. sonnei	Shigella/EIEC	negative	positive	positive	negative	negative	negative	negative	positive	negative	negative	negative	negative	negative	negative	negative
ERR6005699		ERR6005699	604135	Bangladesh	South Asia	S. sonnei	S. sonnei	S. sonnei	S. sonnei	negative	positive	positive	negative	negative	negative	negative	negative	negative	negative	negative	negative	negative	negative	negative
ERR6005700		ERR6005700	604136	Bangladesh	South Asia	S. sonnei	S. sonnei	S. sonnei	S. sonnei	negative	positive	positive	negative	negative	negative	negative	negative	negative	negative	negative	negative	negative	negative	negative
ERR6005701		ERR6005701	604141	Bangladesh	South Asia	S. sonnei	S. sonnei	S. sonnei	S. sonnei	negative	positive	positive	negative	negative	negative	negative	negative	negative	negative	negative	negative	negative	negative	negative
ERR6005325		ERR6005325	604151	Bangladesh	South Asia	2a	2a	2a	2a	negative	positive	negative	negative	positive	negative	negative	negative	negative	negative	negative	negative	negative	negative	negative
ERR6005703	ERR6006348	Merged	604176	Bangladesh	South Asia	S. sonnei	S. sonnei	S. sonnei	S. sonnei	negative	positive	positive	negative	negative	negative	negative	negative	negative	negative	negative	negative	negative	negative	negative
ERR6005327		ERR6005327	604181	Bangladesh	South Asia	2b	2b	2b	2b	negative	positive	negative	negative	positive	negative	negative	positive	negative	negative	negative	negative	negative	negative	negative
ERR6005329		ERR6005329	604193	Bangladesh	South Asia	6	6	6	Shigella/EIEC	negative	positive	negative	negative	negative	negative	negative	negative	negative	negative	negative	negative	negative	negative	negative
ERR6005704	ERR6006349	Merged	604199	Bangladesh	South Asia	S. sonnei	S. sonnei	S. sonnei	S. sonnei	negative	positive	positive	negative	negative	negative	negative	negative	negative	negative	negative	negative	negative	negative	negative
ERR6005330		ERR6005330	604208	Bangladesh	South Asia	6	6	6	Shigella/EIEC	negative	positive	negative	negative	negative	negative	negative	negative	negative	negative	negative	negative	negative	negative	negative
ERR6005696	ERR6006350	Merged	604209	Bangladesh	South Asia	S. sonnei	S. sonnei	S. sonnei	S. sonnei	negative	positive	positive	negative	negative	negative	negative	negative	negative	negative	negative	negative	negative	negative	negative
ERR6005705	ERR6006351	Merged	604210	Bangladesh	South Asia	S. sonnei	S. sonnei	S. sonnei	S. sonnei	negative	positive	positive	negative	negative	negative	negative	negative	negative	negative	negative	negative	negative	negative	negative
ERR6005707	ERR6006352	Merged	604218	Bangladesh	South Asia	S. sonnei	EIEC	S. sonnei	S. sonnei	negative	positive	positive	negative	negative	negative	negative	negative	negative	negative	negative	negative	negative	negative	negative
ERR6005331		ERR6005331	604219	Bangladesh	South Asia	6	6	6	Shigella/EIEC	negative	positive	negative	negative	negative	negative	negative	negative	negative	negative	negative	negative	negative	negative	negative
ERR6005332		ERR6005332	604233	Bangladesh	South Asia	2a	2a	2a	2a	negative	positive	negative	negative	positive	negative	negative	negative	negative	negative	negative	negative	negative	negative	negative
ERR6005708	ERR6006353	Merged	604244	Bangladesh	South Asia	S. sonnei	S. sonnei	S. sonnei	S. sonnei	negative	positive	positive	negative	negative	negative	negative	negative	negative	negative	negative	negative	negative	negative	negative
ERR6005709		ERR6005709	604252	Bangladesh	South Asia	S. sonnei	S. sonnei	S. sonnei	S. sonnei	negative	positive	positive	negative	negative	negative	negative	negative	negative	negative	negative	negative	negative	negative	negative
ERR6005710		ERR6005710	604261	Bangladesh	South Asia	S. sonnei	S. sonnei	S. sonnei	S. sonnei	negative	positive	positive	negative	negative	negative	negative	negative	negative	negative	negative	negative	negative	negative	negative
ERR6005326		ERR6005326	604281	Bangladesh	South Asia	2a	2a	2a	2a	negative	positive	negative	negative	positive	negative	negative	negative	negative	negative	negative	negative	negative	negative	negative
ERR6005333		ERR6005333	604286	Bangladesh	South Asia	6	6	6	Shigella/EIEC	negative	positive	negative	negative	negative	negative	negative	negative	negative	negative	negative	negative	negative	negative	positive
ERR6005711	ERR6006355	Merged	604294	Bangladesh	South Asia	S. sonnei	S. sonnei	S. sonnei	S. sonnei	negative	positive	positive	negative	negative	negative	negative	negative	negative	negative	negative	negative	negative	negative	negative
ERR6005712	ERR6006356	Merged	604296	Bangladesh	South Asia	S. sonnei	S. sonnei	S. sonnei	S. sonnei	negative	positive	positive	negative	negative	negative	negative	negative	negative	negative	negative	negative	negative	negative	negative
ERR6005713	ERR6006357	Merged	604303	Bangladesh	South Asia	S. sonnei	S. sonnei	S. sonnei	S. sonnei	negative	positive	positive	negative	negative	negative	negative	negative	negative	negative	negative	negative	negative	negative	negative
ERR6005714	ERR6006358	Merged	604304	Bangladesh	South Asia	S. sonnei	S. sonnei	S. sonnei	S. sonnei	negative	positive	positive	negative	negative	negative	negative	negative	negative	negative	negative	negative	negative	negative	negative
ERR6005706	ERR6006359	Merged	604325	Bangladesh	South Asia	S. sonnei	S. sonnei	S. sonnei	S. sonnei	negative	positive	positive	negative	negative	negative	negative	negative	negative	negative	negative	negative	negative	negative	negative
ERR6005715	ERR6006360	Merged	604326	Bangladesh	South Asia	S. sonnei	S. sonnei	S. sonnei	S. sonnei	negative	positive	positive	negative	negative	negative	negative	negative	negative	negative	negative	negative	negative	negative	negative
ERR6005717	ERR6006361	Merged	604332	Bangladesh	South Asia	S. sonnei	S. sonnei	S. sonnei	S. sonnei	negative	positive	positive	negative	negative	negative	negative	negative	negative	negative	negative	negative	negative	negative	negative
ERR6005335		ERR6005335	604340	Bangladesh	South Asia	3a	3a	3a	Shigella/EIEC	negative	positive	negative	negative	negative	positive	positive	positive	negative	negative	negative	negative	negative	negative	negative
ERR6005336		ERR6005336	604361	Bangladesh	South Asia	2b	No prediction	2b	2b	negative	positive	negative	negative	positive	negative	negative	positive	negative	negative	negative	negative	negative	negative	negative
ERR6005718	ERR6006362	Merged	604367	Bangladesh	South Asia	S. sonnei	S. sonnei	S. sonnei	S. sonnei	negative	positive	positive	negative	negative	negative	negative	negative	negative	negative	negative	negative	negative	negative	negative
ERR6005337		ERR6005337	604369	Bangladesh	South Asia	2b	2b	2b	2b	negative	positive	negative	negative	positive	negative	negative	positive	negative	negative	negative	negative	negative	negative	negative
ERR6005719	ERR6006364	Merged	604377	Bangladesh	South Asia	S. sonnei	S. sonnei	S. sonnei	S. sonnei	negative	positive	positive	negative	negative	negative	negative	negative	negative	negative	negative	negative	negative	negative	negative
ERR6005339	ERR6006365	Merged	604378	Bangladesh	South Asia	2a	2a	2a	2a	negative	positive	negative	negative	positive	negative	negative	negative	negative	negative	negative	negative	negative	negative	negative
ERR6005340		ERR6005340	604397	Bangladesh	South Asia	3a	3a	3a	3a/5b	negative	positive	negative	negative	negative	negative	positive	positive	negative	negative	negative	negative	negative	negative	negative
ERR6005720		ERR6005720	604398	Bangladesh	South Asia	S. sonnei	S. sonnei	S. sonnei	S. sonnei	negative	positive	positive	negative	negative	negative	negative	negative	negative	negative	negative	negative	negative	negative	positive
ERR6005721	ERR6006366	Merged	604402	Bangladesh	South Asia	S. sonnei	S. sonnei	S. sonnei	S. sonnei	negative	positive	positive	negative	negative	negative	negative	negative	negative	negative	negative	negative	negative	negative	negative
ERR6005341		ERR6005341	604416	Bangladesh	South Asia	2a	2a	2a	2a	negative	positive	negative	negative	positive	negative	negative	negative	negative	negative	negative	negative	negative	negative	negative
ERR6005722	ERR6006367	Merged	604422	Bangladesh	South Asia	S. sonnei	S. sonnei	S. sonnei	S. sonnei	negative	positive	positive	negative	negative	negative	negative	negative	negative	negative	negative	negative	negative	negative	negative
ERR6005342		ERR6005342	604423	Bangladesh	South Asia	6	6	6	Shigella/EIEC	negative	positive	negative	negative	negative	negative	negative	negative	negative	negative	negative	negative	negative	negative	negative
ERR6005343		ERR6005343	604434	Bangladesh	South Asia	2a	2a	2a	2a	negative	positive	negative	negative	positive	negative	negative	negative	negative	negative	negative	negative	negative	negative	negative
ERR6005723	ERR6006368	Merged	604457	Bangladesh	South Asia	S. sonnei	S. sonnei	S. sonnei	S. sonnei	negative	positive	positive	negative	negative	negative	negative	negative	negative	negative	negative	negative	negative	negative	negative
ERR6005724		ERR6005724	604461	Bangladesh	South Asia	S. sonnei	S. sonnei	S. sonnei	S. sonnei	negative	positive	positive	negative	negative	negative	negative	negative	negative	negative	negative	negative	negative	negative	negative
ERR6005344		ERR6005344	604462	Bangladesh	South Asia	1c(7a)	1c(7a)	1c(7a)	1a/1c(7a)	negative	positive	negative	positive	negative	negative	negative	negative	negative	negative	negative	negative	negative	negative	negative
ERR6005716		ERR6005716	604464	Bangladesh	South Asia	S. sonnei	No prediction	S. sonnei	S. sonnei	negative	positive	positive	negative	negative	negative	negative	negative	negative	negative	negative	negative	negative	negative	negative
ERR6005725	ERR6006370	Merged	604482	Bangladesh	South Asia	S. sonnei	S. sonnei	S. sonnei	S. sonnei	negative	positive	positive	negative	negative	negative	negative	negative	negative	negative	negative	negative	negative	negative	negative
ERR6005727	ERR6006371	Merged	604502	Bangladesh	South Asia	S. sonnei	S. sonnei	S. sonnei	S. sonnei	negative	positive	positive	negative	negative	negative	negative	negative	negative	negative	negative	negative	negative	negative	negative
ERR6005728		ERR6005728	604532	Bangladesh	South Asia	S. sonnei	S. sonnei	S. sonnei	S. sonnei	negative	positive	positive	negative	negative	negative	negative	negative	negative	negative	negative	negative	negative	negative	negative
ERR6005346		ERR6005346	604534	Bangladesh	South Asia	3a	5b	5b	3a/5b	negative	positive	negative	negative	negative	negative	positive	positive	negative	negative	negative	negative	negative	negative	negative
ERR6005347		ERR6005347	604548	Bangladesh	South Asia	2a	2a	2a	2a	negative	positive	negative	negative	positive	negative	negative	negative	negative	negative	negative	negative	negative	negative	negative
ERR6005348	ERR6006372	Merged	604551	Bangladesh	South Asia	6	6	6	Shigella/EIEC	negative	positive	negative	negative	negative	negative	negative	negative	negative	negative	negative	negative	negative	negative	negative
ERR6005349		ERR6005349	604554	Bangladesh	South Asia	3a	3a	3b	3a/5b	negative	positive	negative	negative	negative	negative	positive	positive	negative	negative	negative	negative	negative	negative	negative
ERR6005428		ERR6005428	700007	Pakistan	South Asia	S. sonnei	S. sonnei	S. sonnei	S. sonnei	negative	positive	positive	negative	negative	negative	negative	negative	negative	negative	negative	negative	negative	negative	negative
ERR6004635		ERR6004635	700014	Pakistan	South Asia	6	6	6	Shigella/EIEC	negative	positive	negative	negative	negative	negative	negative	negative	negative	negative	negative	negative	negative	negative	negative
ERR6004631		ERR6004631	700016	Pakistan	South Asia	6	6	6	Shigella/EIEC	negative	positive	negative	negative	negative	negative	negative	negative	negative	negative	negative	negative	negative	negative	negative
ERR6005424		ERR6005424	700017	Pakistan	South Asia	S. sonnei	S. sonnei	S. sonnei	S. sonnei	negative	positive	positive	negative	negative	negative	negative	negative	negative	negative	negative	negative	negative	negative	negative
ERR6005425		ERR6005425	700018	Pakistan	South Asia	S. sonnei	S. sonnei	S. sonnei	S. sonnei	negative	positive	positive	negative	negative	negative	negative	negative	negative	negative	negative	negative	negative	negative	negative
ERR6005422		ERR6005422	700058	Pakistan	South Asia	S. sonnei	S. sonnei	S. sonnei	S. sonnei	negative	positive	positive	negative	negative	negative	negative	negative	negative	negative	negative	negative	negative	negative	negative
ERR6004650		ERR6004650	700083	Pakistan	South Asia	6	6	6	Shigella/EIEC	negative	positive	negative	negative	negative	negative	negative	negative	negative	negative	negative	negative	negative	negative	negative
ERR6005430		ERR6005430	700088	Pakistan	South Asia	S. sonnei	EIEC	S. sonnei	S. sonnei	negative	positive	positive	negative	negative	negative	negative	negative	negative	negative	negative	negative	negative	negative	negative
ERR6004643		ERR6004643	700091	Pakistan	South Asia	2a	2a	2a	2a	negative	positive	negative	negative	positive	negative	negative	negative	negative	negative	negative	negative	negative	negative	negative
ERR6004633		ERR6004633	700131	Pakistan	South Asia	1c(7a)	1c(7a)	1c(7a)	1a/1c(7a)	negative	positive	negative	positive	negative	negative	negative	negative	negative	negative	negative	negative	negative	negative	negative
ERR6005426		ERR6005426	700155	Pakistan	South Asia	S. sonnei	No prediction	S. sonnei	S. sonnei	negative	positive	positive	negative	negative	negative	negative	negative	negative	negative	negative	negative	negative	negative	negative
ERR6004642		ERR6004642	700201	Pakistan	South Asia	2a	2a	2a	2a	negative	positive	negative	negative	positive	negative	negative	negative	negative	negative	negative	negative	negative	negative	negative
ERR6004644		ERR6004644	700241	Pakistan	South Asia	2a	2a	2a	2a	negative	positive	negative	negative	positive	negative	negative	negative	negative	negative	negative	negative	negative	negative	negative
ERR6004641		ERR6004641	700245	Pakistan	South Asia	3a	3a	3a	3a/5b	negative	positive	negative	negative	negative	negative	positive	positive	negative	negative	negative	negative	negative	negative	negative
ERR6004638		ERR6004638	700277	Pakistan	South Asia	6	6	6	Shigella/EIEC	negative	positive	negative	negative	negative	negative	negative	negative	negative	negative	negative	negative	negative	negative	negative
ERR6004640		ERR6004640	700284	Pakistan	South Asia	3a	3a	3b	3a/5b	negative	positive	negative	negative	negative	negative	positive	positive	negative	negative	negative	negative	negative	negative	negative
ERR6004648		ERR6004648	700302	Pakistan	South Asia	6	6	6	Shigella/EIEC	negative	positive	negative	negative	negative	negative	negative	negative	negative	negative	negative	negative	negative	negative	negative
ERR6005429		ERR6005429	700335	Pakistan	South Asia	S. sonnei	S. sonnei	S. sonnei	S. sonnei	negative	positive	positive	negative	negative	negative	negative	negative	negative	negative	negative	negative	negative	negative	negative
ERR6005423		ERR6005423	700339	Pakistan	South Asia	S. sonnei	S. sonnei	non-Shigella/EIEC	S. sonnei	negative	positive	positive	negative	negative	negative	negative	negative	negative	negative	negative	negative	negative	negative	negative
ERR6004645		ERR6004645	700360	Pakistan	South Asia	1c(7a)	Novel	1c(7a)	1a/1c(7a)	negative	positive	negative	positive	negative	negative	negative	negative	negative	negative	negative	negative	negative	negative	negative
ERR6004637		ERR6004637	700381	Pakistan	South Asia	6	6	6	Shigella/EIEC	negative	positive	negative	negative	negative	negative	negative	negative	negative	negative	negative	negative	negative	negative	negative
ERR6005427		ERR6005427	700388	Pakistan	South Asia	S. sonnei	S. sonnei	S. sonnei	S. sonnei	negative	positive	positive	negative	negative	negative	negative	negative	negative	negative	negative	negative	negative	negative	negative
ERR6005524	ERR6006373	Merged	700432	Pakistan	South Asia	S. sonnei	S. sonnei	S. sonnei	S. sonnei	negative	positive	positive	negative	negative	negative	negative	negative	negative	negative	negative	negative	negative	negative	negative
ERR6004636		ERR6004636	700482	Pakistan	South Asia	6	6	6	Shigella/EIEC	negative	positive	negative	negative	negative	negative	negative	negative	negative	negative	negative	negative	negative	negative	negative
ERR6004647		ERR6004647	700506	Pakistan	South Asia	2a	2a	2a	2a	negative	positive	negative	negative	positive	negative	negative	negative	negative	negative	negative	negative	negative	negative	negative
ERR6004651		ERR6004651	700546	Pakistan	South Asia	2a	2a	2a	2a	negative	positive	negative	negative	positive	negative	negative	negative	negative	negative	negative	negative	negative	negative	negative
ERR6004649		ERR6004649	700548	Pakistan	South Asia	6	6	6	Shigella/EIEC	negative	positive	negative	negative	negative	negative	negative	negative	negative	negative	negative	negative	negative	negative	negative
ERR6004897	ERR6006374	Merged	700678	Pakistan	South Asia	1c(7a)	1c(7a)	1c(7a)	1a/1c(7a)	negative	positive	negative	positive	negative	negative	negative	negative	negative	negative	negative	negative	negative	negative	negative
ERR6004899	ERR6006375	Merged	700712	Pakistan	South Asia	2a	2a	2a	2a	negative	positive	negative	negative	positive	negative	negative	negative	negative	negative	negative	negative	negative	negative	negative
ERR6004898		ERR6004898	700738	Pakistan	South Asia	3a	3a	3a	3a/5b	negative	positive	negative	negative	negative	negative	positive	positive	negative	negative	negative	negative	negative	negative	negative
ERR6004895		ERR6004895	700750	Pakistan	South Asia	6	6	6	Shigella/EIEC	negative	positive	negative	negative	negative	negative	negative	negative	negative	negative	negative	negative	negative	negative	negative
ERR6004896	ERR6006376	ERR6004896	700753	Pakistan	South Asia	3a	3a	EIEC	Shigella/EIEC	negative	positive	negative	positive	negative	negative	positive	positive	negative	negative	negative	negative	negative	negative	negative
ERR6004903		ERR6004903	700812	Pakistan	South Asia	2a	2a	2a	2a	negative	positive	negative	negative	positive	negative	negative	negative	negative	negative	negative	negative	negative	negative	negative
ERR6005525		ERR6005525	700818	Pakistan	South Asia	S. sonnei	S. sonnei	S. sonnei	S. sonnei	negative	positive	positive	negative	negative	negative	negative	negative	negative	negative	negative	negative	negative	negative	negative
ERR6004900		ERR6004900	700868	Pakistan	South Asia	4a	4av	4av	Shigella/EIEC	negative	positive	negative	negative	negative	negative	negative	negative	negative	negative	negative	negative	negative	negative	negative
ERR6004904		ERR6004904	700918	Pakistan	South Asia	6	6	6	Shigella/EIEC	negative	positive	negative	negative	negative	negative	negative	negative	negative	negative	negative	negative	negative	negative	negative
ERR6005526		ERR6005526	700973	Pakistan	South Asia	S. sonnei	S. sonnei	S. sonnei	S. sonnei	negative	positive	positive	negative	negative	negative	negative	negative	negative	negative	negative	negative	negative	negative	negative
ERR6004902		ERR6004902	702013	Pakistan	South Asia	4a	4av	4av	Shigella/EIEC	negative	positive	negative	negative	negative	negative	negative	negative	negative	negative	negative	negative	negative	negative	negative
ERR6004906		ERR6004906	702019	Pakistan	South Asia	2a	2a	2a	2a	negative	positive	negative	negative	positive	negative	negative	negative	negative	negative	negative	negative	negative	negative	negative
ERR6005527		ERR6005527	702021	Pakistan	South Asia	S. sonnei	S. sonnei	S. sonnei	S. sonnei	negative	positive	positive	negative	negative	negative	negative	negative	negative	negative	negative	negative	negative	negative	negative
ERR6004908		ERR6004908	702033	Pakistan	South Asia	1b	1b	1b	Shigella/EIEC	negative	positive	negative	negative	negative	positive	negative	negative	negative	negative	negative	negative	negative	negative	negative
ERR6005528		ERR6005528	702089	Pakistan	South Asia	S. sonnei	S. sonnei	S. sonnei	S. sonnei	negative	positive	positive	negative	negative	negative	negative	negative	negative	negative	negative	negative	negative	negative	negative
ERR6004907		ERR6004907	702096	Pakistan	South Asia	2a	2a	2a	2a	negative	positive	negative	negative	positive	negative	negative	negative	negative	negative	negative	negative	negative	negative	negative
ERR6004910		ERR6004910	702102	Pakistan	South Asia	3a	3a	3a	3a/5b	negative	positive	negative	negative	negative	negative	positive	positive	negative	negative	negative	negative	negative	negative	negative
ERR6005529		ERR6005529	702154	Pakistan	South Asia	S. sonnei	S. sonnei	S. sonnei	S. sonnei	negative	positive	positive	negative	negative	negative	negative	negative	negative	negative	negative	negative	negative	negative	negative
ERR6004909		ERR6004909	702167	Pakistan	South Asia	2a	2a	2a	2a	negative	positive	negative	negative	positive	negative	negative	negative	negative	negative	negative	negative	negative	negative	negative
ERR6005137		ERR6005137	702207	Pakistan	South Asia	6	6	6	Shigella/EIEC	negative	positive	negative	negative	negative	negative	negative	negative	negative	negative	negative	negative	negative	negative	negative
ERR6004911		ERR6004911	702230	Pakistan	South Asia	1b	1b	1b	1b	negative	positive	negative	positive	negative	positive	negative	negative	negative	negative	negative	negative	negative	negative	negative
ERR6005138	ERR6006377	Merged	702248	Pakistan	South Asia	6	No prediction	6	Shigella/EIEC	negative	positive	negative	negative	negative	negative	negative	negative	negative	negative	negative	negative	negative	negative	negative
ERR6005620		ERR6005620	702252	Pakistan	South Asia	S. sonnei	S. sonnei	S. sonnei	S. sonnei	negative	positive	positive	negative	negative	negative	negative	negative	negative	negative	negative	negative	negative	negative	negative
ERR6005139		ERR6005139	702387	Pakistan	South Asia	1b	1b	1b	1b	negative	positive	negative	positive	negative	positive	negative	negative	negative	negative	negative	negative	negative	negative	negative
ERR6005141		ERR6005141	702530	Pakistan	South Asia	6	6	6	Shigella/EIEC	negative	positive	negative	negative	negative	negative	negative	negative	negative	negative	negative	negative	negative	negative	negative
ERR6005143		ERR6005143	702540	Pakistan	South Asia	1b	1b	1b	1b	negative	positive	negative	positive	negative	positive	negative	negative	negative	negative	negative	negative	negative	negative	negative
ERR6005140		ERR6005140	702690	Pakistan	South Asia	1b	1b	1b	1b	negative	positive	negative	positive	negative	positive	negative	negative	negative	negative	negative	negative	negative	negative	negative
ERR6005144		ERR6005144	702705	Pakistan	South Asia	1b	1b	1b	1b	negative	positive	negative	positive	negative	positive	negative	negative	negative	negative	negative	negative	negative	negative	negative
ERR6005145		ERR6005145	702711	Pakistan	South Asia	2a	2a	2a	2a	negative	positive	negative	negative	positive	negative	negative	negative	negative	negative	negative	negative	negative	negative	negative
ERR6005146		ERR6005146	702718	Pakistan	South Asia	6	6	6	Shigella/EIEC	negative	positive	negative	negative	negative	negative	negative	negative	negative	negative	negative	negative	negative	negative	negative
ERR6005147		ERR6005147	702752	Pakistan	South Asia	1b	1b	1b	1b	negative	positive	negative	positive	negative	positive	negative	negative	negative	negative	negative	negative	negative	negative	negative
ERR6005312		ERR6005312	702761	Pakistan	South Asia	3a	3a	3a	3a/5b	negative	positive	negative	negative	negative	negative	positive	positive	negative	negative	negative	negative	negative	negative	negative
ERR6005149		ERR6005149	702822	Pakistan	South Asia	6	6	6	Shigella/EIEC	negative	positive	negative	negative	negative	negative	negative	negative	negative	negative	negative	negative	negative	negative	negative
ERR6005151		ERR6005151	702824	Pakistan	South Asia	2a	2a	2a	2a	negative	positive	negative	negative	positive	negative	negative	negative	negative	negative	negative	negative	negative	negative	negative
ERR6005155		ERR6005155	702831	Pakistan	South Asia	1b	1b	1b	1b	negative	positive	negative	positive	negative	positive	negative	negative	negative	negative	negative	negative	negative	negative	negative
ERR6005153		ERR6005153	702839	Pakistan	South Asia	1c(7a)	1c(7a)	1c(7a)	1a/1c(7a)	negative	positive	negative	positive	negative	negative	negative	negative	negative	negative	negative	negative	negative	negative	negative
ERR6005150		ERR6005150	702844	Pakistan	South Asia	6	1b	1b	1b	negative	positive	negative	positive	negative	positive	negative	negative	negative	negative	negative	negative	negative	negative	negative
ERR6005154		ERR6005154	702865	Pakistan	South Asia	6	6	6	Shigella/EIEC	negative	positive	negative	negative	negative	negative	negative	negative	negative	negative	negative	negative	negative	negative	negative
ERR6005621	ERR6006379	Merged	702866	Pakistan	South Asia	S. sonnei	EIEC	S. sonnei	S. sonnei	negative	positive	positive	negative	negative	negative	negative	negative	negative	negative	negative	negative	negative	negative	negative
ERR6005152		ERR6005152	702881	Pakistan	South Asia	2a	2a	2a	2a	negative	positive	negative	negative	positive	negative	negative	negative	negative	negative	negative	negative	negative	negative	negative
ERR6005148		ERR6005148	702938	Pakistan	South Asia	6	6	6	Shigella/EIEC	negative	positive	negative	negative	negative	negative	negative	negative	negative	negative	negative	negative	negative	negative	negative
ERR6005622	ERR6006380	Merged	702956	Pakistan	South Asia	S. sonnei	S. sonnei	S. sonnei	S. sonnei	negative	positive	positive	negative	negative	negative	negative	negative	negative	negative	negative	positive	negative	negative	negative
ERR6005158		ERR6005158	702958	Pakistan	South Asia	4a	4av	4av	Shigella/EIEC	negative	positive	negative	negative	negative	negative	negative	negative	negative	negative	negative	negative	negative	negative	negative
ERR6005156		ERR6005156	703001	Pakistan	South Asia	2a	2a	2a	2a	negative	positive	negative	negative	positive	negative	negative	negative	negative	negative	negative	negative	negative	negative	negative
ERR6005159		ERR6005159	703054	Pakistan	South Asia	3a	3a	3a	3a/5b	negative	positive	negative	negative	negative	negative	positive	positive	negative	negative	negative	negative	negative	negative	negative
ERR6005160		ERR6005160	703055	Pakistan	South Asia	3a	3a	3a	3a/5b	negative	positive	negative	negative	negative	negative	positive	positive	negative	negative	negative	negative	negative	negative	negative
ERR6005157		ERR6005157	703087	Pakistan	South Asia	2a	2a	2a	2a	negative	positive	negative	negative	positive	negative	negative	negative	negative	negative	negative	negative	negative	negative	negative
ERR6005161		ERR6005161	703097	Pakistan	South Asia	2a	Novel	2a	2a	negative	positive	negative	negative	positive	negative	negative	negative	negative	negative	negative	negative	negative	negative	negative
ERR6005685		ERR6005685	703119	Pakistan	South Asia	S. sonnei	S. sonnei	S. sonnei	S. sonnei	negative	positive	positive	negative	negative	negative	negative	negative	negative	negative	negative	negative	negative	negative	negative
ERR6005684		ERR6005684	703120	Pakistan	South Asia	S. sonnei	S. sonnei	S. sonnei	S. sonnei	negative	positive	positive	negative	negative	negative	negative	negative	negative	negative	negative	negative	negative	negative	negative
ERR6005295		ERR6005295	703121	Pakistan	South Asia	6	6	6	Shigella/EIEC	negative	positive	negative	negative	negative	negative	negative	negative	negative	negative	negative	negative	negative	negative	negative
ERR6005296		ERR6005296	703122	Pakistan	South Asia	6	6	6	Shigella/EIEC	negative	positive	negative	negative	negative	negative	negative	negative	negative	negative	negative	negative	negative	negative	negative
ERR6005686		ERR6005686	703146	Pakistan	South Asia	S. sonnei	S. sonnei	S. sonnei	S. sonnei	negative	positive	positive	negative	negative	negative	negative	negative	negative	negative	negative	negative	negative	negative	negative
ERR6005683		ERR6005683	703147	Pakistan	South Asia	S. sonnei	S. sonnei	S. sonnei	S. sonnei	negative	positive	positive	negative	negative	negative	negative	negative	negative	negative	negative	negative	negative	negative	negative
ERR6005166		ERR6005166	703177	Pakistan	South Asia	6	6	6	Shigella/EIEC	negative	positive	negative	negative	negative	negative	negative	negative	negative	negative	negative	negative	negative	negative	negative
ERR6005165		ERR6005165	703213	Pakistan	South Asia	6	6	6	Shigella/EIEC	negative	positive	negative	negative	negative	negative	negative	negative	negative	negative	negative	negative	negative	negative	negative
ERR6005623		ERR6005623	703254	Pakistan	South Asia	S. sonnei	S. sonnei	S. sonnei	S. sonnei	negative	positive	positive	negative	negative	negative	negative	negative	negative	negative	negative	negative	negative	negative	negative
ERR6005164		ERR6005164	703272	Pakistan	South Asia	4a	Novel	4av	Shigella/EIEC	negative	positive	negative	negative	negative	negative	negative	negative	negative	negative	negative	negative	negative	negative	negative
ERR6005298		ERR6005298	703277	Pakistan	South Asia	6	6	6	Shigella/EIEC	negative	positive	negative	negative	negative	negative	negative	negative	negative	negative	negative	negative	negative	negative	negative
ERR6005297		ERR6005297	703280	Pakistan	South Asia	6	6	6	Shigella/EIEC	negative	positive	negative	negative	negative	negative	negative	negative	negative	negative	negative	negative	negative	negative	negative
ERR6005687	ERR6006382	Merged	703320	Pakistan	South Asia	S. sonnei	S. sonnei	S. sonnei	S. sonnei	negative	positive	positive	negative	negative	negative	negative	negative	negative	negative	negative	negative	negative	negative	negative
ERR6005688		ERR6005688	703332	Pakistan	South Asia	S. sonnei	S. sonnei	S. sonnei	S. sonnei	negative	positive	positive	negative	negative	negative	negative	negative	negative	negative	negative	negative	negative	negative	negative
ERR6005304		ERR6005304	703363	Pakistan	South Asia	6	6	6	Shigella/EIEC	negative	positive	negative	negative	negative	negative	negative	negative	negative	negative	negative	negative	negative	negative	negative
ERR6005302		ERR6005302	703439	Pakistan	South Asia	2a	2a	2a	2a	negative	positive	negative	negative	positive	negative	negative	negative	negative	negative	negative	negative	negative	negative	negative
ERR6005299		ERR6005299	703452	Pakistan	South Asia	6	6	6	Shigella/EIEC	negative	positive	negative	negative	negative	negative	negative	negative	negative	negative	negative	negative	negative	negative	negative
ERR6005301		ERR6005301	703463	Pakistan	South Asia	3a	3a	3a	3a/5b	negative	positive	negative	negative	negative	negative	positive	positive	negative	negative	negative	negative	negative	negative	negative
ERR6005305		ERR6005305	703499	Pakistan	South Asia	1b	1b	1b	1b	negative	positive	negative	positive	negative	positive	negative	negative	negative	negative	negative	negative	negative	negative	negative
ERR6005303		ERR6005303	703539	Pakistan	South Asia	6	6	6	Shigella/EIEC	negative	positive	negative	negative	negative	negative	negative	negative	negative	negative	negative	negative	negative	negative	negative
ERR6005306		ERR6005306	703548	Pakistan	South Asia	2a	2a	2a	2a	negative	positive	negative	negative	positive	negative	negative	negative	negative	negative	negative	negative	negative	negative	negative
ERR6005307		ERR6005307	703569	Pakistan	South Asia	3a	3a	3a	3a/5b	negative	positive	negative	negative	negative	negative	positive	positive	negative	negative	negative	negative	negative	negative	negative
ERR6005689		ERR6005689	703643	Pakistan	South Asia	S. sonnei	S. sonnei	S. sonnei	S. sonnei	negative	positive	positive	negative	negative	negative	negative	negative	negative	negative	negative	negative	negative	negative	negative
ERR6005309		ERR6005309	703669	Pakistan	South Asia	1c(7a)	1c(7a)	1c(7a)	1a/1c(7a)	negative	positive	negative	positive	negative	negative	negative	negative	negative	negative	negative	negative	negative	negative	negative
ERR6005363	ERR6006383	Merged	703693	Pakistan	South Asia	4a	EIEC	4av	Shigella/EIEC	negative	positive	positive	negative	negative	negative	negative	negative	negative	negative	negative	negative	negative	negative	negative
ERR6005364		ERR6005364	703705	Pakistan	South Asia	1b	1b	1b	1b	negative	positive	negative	positive	negative	positive	negative	negative	negative	negative	negative	negative	negative	negative	negative
ERR6005308		ERR6005308	703714	Pakistan	South Asia	2a	2a	2a	2a	negative	positive	negative	negative	positive	negative	negative	negative	negative	negative	negative	negative	negative	negative	negative
ERR6005310		ERR6005310	703724	Pakistan	South Asia	1b	1b	1b	1b	negative	positive	negative	positive	negative	positive	negative	negative	negative	negative	negative	negative	negative	negative	negative
ERR6005362		ERR6005362	703756	Pakistan	South Asia	1c(7a)	1c(7a)	1c(7a)	1a/1c(7a)	negative	positive	negative	positive	negative	negative	negative	negative	negative	negative	negative	positive	negative	negative	negative
ERR6005371		ERR6005371	703761	Pakistan	South Asia	1b	1b	1b	1b	negative	positive	negative	positive	negative	positive	negative	negative	negative	negative	negative	negative	negative	negative	negative
ERR6005360		ERR6005360	703765	Pakistan	South Asia	6	6	6	Shigella/EIEC	negative	positive	negative	negative	negative	negative	negative	negative	negative	negative	negative	positive	negative	negative	negative
ERR6005359		ERR6005359	703767	Pakistan	South Asia	4a	4av	4av	Shigella/EIEC	negative	positive	negative	negative	negative	negative	negative	negative	negative	negative	negative	negative	negative	negative	negative
ERR6005368	ERR6006384	Merged	703800	Pakistan	South Asia	4a	4av	4av	Shigella/EIEC	negative	positive	negative	negative	negative	negative	negative	negative	negative	negative	negative	negative	negative	negative	negative
ERR6005361	ERR6006385	Merged	703819	Pakistan	South Asia	1b	EIEC	1b	1b	negative	positive	negative	positive	negative	positive	negative	negative	negative	negative	negative	negative	negative	negative	negative
ERR6005738		ERR6005738	703824	Pakistan	South Asia	S. sonnei	S. sonnei	S. sonnei	S. sonnei	negative	positive	positive	negative	negative	negative	negative	negative	negative	negative	negative	negative	negative	negative	negative
ERR6005367		ERR6005367	703875	Pakistan	South Asia	2a	2a	2a	2a	negative	positive	negative	negative	positive	negative	negative	negative	negative	negative	negative	negative	negative	negative	negative
ERR6005369		ERR6005369	703881	Pakistan	South Asia	4a	4av	4av	Shigella/EIEC	negative	positive	negative	negative	negative	negative	negative	negative	negative	negative	negative	negative	negative	negative	negative
ERR6005372	ERR6006388	Merged	703889	Pakistan	South Asia	4a	Novel	4av	Shigella/EIEC	negative	positive	negative	negative	negative	negative	negative	negative	negative	negative	negative	positive	negative	negative	negative
ERR6005373		ERR6005373	703894	Pakistan	South Asia	4a	4av	4av	Shigella/EIEC	negative	positive	negative	negative	negative	negative	negative	negative	negative	negative	negative	negative	negative	negative	negative
ERR6005378	ERR6006389	Merged	703930	Pakistan	South Asia	1b	1b	1b	1b	negative	positive	negative	positive	negative	positive	negative	negative	negative	negative	negative	negative	negative	negative	negative
ERR6005374	ERR6006390	Merged	703963	Pakistan	South Asia	3a	3a	3a	3a/5b	negative	positive	negative	negative	negative	negative	positive	positive	negative	negative	negative	negative	negative	negative	negative
ERR6005375	ERR6006391	Merged	703986	Pakistan	South Asia	1c(7a)	Novel	1c(7a)	1d	negative	positive	negative	positive	negative	negative	negative	positive	negative	negative	negative	negative	negative	negative	negative
ERR6005370		ERR6005370	704000	Pakistan	South Asia	2a	2a	2a	2a	negative	positive	negative	negative	positive	negative	negative	negative	negative	negative	negative	negative	negative	negative	negative
ERR6005380	ERR6006393	Merged	704099	Pakistan	South Asia	3a	Novel	3a	3a/5b	negative	positive	negative	negative	negative	negative	positive	positive	negative	negative	negative	negative	negative	negative	negative
ERR6005379	ERR6006394	Merged	704135	Pakistan	South Asia	4a	4av	4av	Shigella/EIEC	negative	positive	negative	negative	negative	negative	negative	negative	negative	negative	negative	negative	negative	negative	negative
ERR6005739	ERR6006395	Merged	704139	Pakistan	South Asia	S. sonnei	S. sonnei	S. sonnei	S. sonnei	negative	positive	positive	negative	negative	negative	negative	negative	negative	negative	negative	negative	negative	negative	negative
ERR6005740	ERR6006396	Merged	704141	Pakistan	South Asia	S. sonnei	EIEC	S. sonnei	S. sonnei	negative	positive	positive	negative	negative	negative	negative	negative	negative	negative	negative	negative	negative	negative	negative
ERR6005376	ERR6006397	Merged	704148	Pakistan	South Asia	3a	3a	3a	3a/5b	negative	positive	negative	negative	negative	negative	positive	positive	negative	negative	negative	negative	negative	negative	negative
ERR6005741	ERR6006399	Merged	704178	Pakistan	South Asia	S. sonnei	EIEC	S. sonnei	S. sonnei	negative	positive	positive	negative	negative	negative	negative	negative	negative	negative	negative	negative	negative	negative	negative
ERR6005381	ERR6006400	Merged	704259	Pakistan	South Asia	2a	Novel	Unknown	2a	negative	positive	negative	negative	positive	negative	negative	negative	negative	negative	negative	negative	negative	negative	negative
ERR6005442		ERR6005442	100515_II	The Gambia	West Africa	S. sonnei	S. sonnei	S. sonnei	S. sonnei	negative	positive	positive	negative	negative	negative	negative	negative	negative	negative	negative	negative	negative	negative	negative
ERR6005608		ERR6005608	102760_II	The Gambia	West Africa	S. sonnei	S. sonnei	S. sonnei	S. sonnei	negative	positive	positive	negative	negative	negative	negative	negative	negative	negative	negative	negative	negative	negative	negative
ERR6005538		ERR6005538	300225_I	Mozambique	East Africa	S. sonnei	S. sonnei	S. sonnei	S. sonnei	negative	positive	positive	negative	negative	negative	negative	negative	negative	negative	negative	negative	negative	negative	negative
ERR6005459		ERR6005459	401063_I	Kenya	East Africa	S. sonnei	S. sonnei	S. sonnei	S. sonnei	negative	positive	positive	negative	negative	negative	negative	negative	negative	negative	negative	negative	negative	negative	negative
ERR6005464	ERR6006318	Merged	602064_II	Bangladesh	South Asia	S. sonnei	S. sonnei	S. sonnei	Shigella/EIEC	negative	positive	positive	positive	negative	positive	negative	negative	negative	negative	negative	negative	negative	negative	negative
ERR6005563		ERR6005563	602899_II	Bangladesh	South Asia	S. sonnei	S. sonnei	S. sonnei	S. sonnei	negative	positive	positive	negative	negative	negative	negative	negative	negative	negative	negative	negative	negative	negative	negative
ERR6005637		ERR6005637	603759_II	Bangladesh	South Asia	S. sonnei	S. sonnei	S. sonnei	S. sonnei	negative	positive	positive	negative	negative	negative	negative	negative	negative	negative	negative	negative	negative	negative	negative
ERR6005531		ERR6005531	700479_II	Pakistan	South Asia	S. sonnei	S. sonnei	S. sonnei	S. sonnei	negative	positive	positive	negative	negative	negative	negative	negative	negative	negative	negative	negative	negative	negative	negative
ERR6005530		ERR6005530	700482_II	Pakistan	South Asia	S. sonnei	S. sonnei	S. sonnei	S. sonnei	negative	positive	positive	negative	negative	negative	negative	negative	negative	negative	negative	negative	negative	negative	negative
ERR6005537		ERR6005537	700918_II	Pakistan	South Asia	S. sonnei	S. sonnei	non-Shigella/EIEC	S. sonnei	negative	positive	positive	negative	negative	negative	negative	negative	negative	negative	negative	negative	negative	negative	negative
